# Supplementary material for: Pathogen infection and cholesterol deficiency activate the C. elegans p38 immune pathway through a TIR-1/SARM1 phase transition
Source: eLife journal article supplement (doi:10.7554/elife.74206), 2022-01-31
Supplement: data1 [file elife-74206-data1-v2.zip]

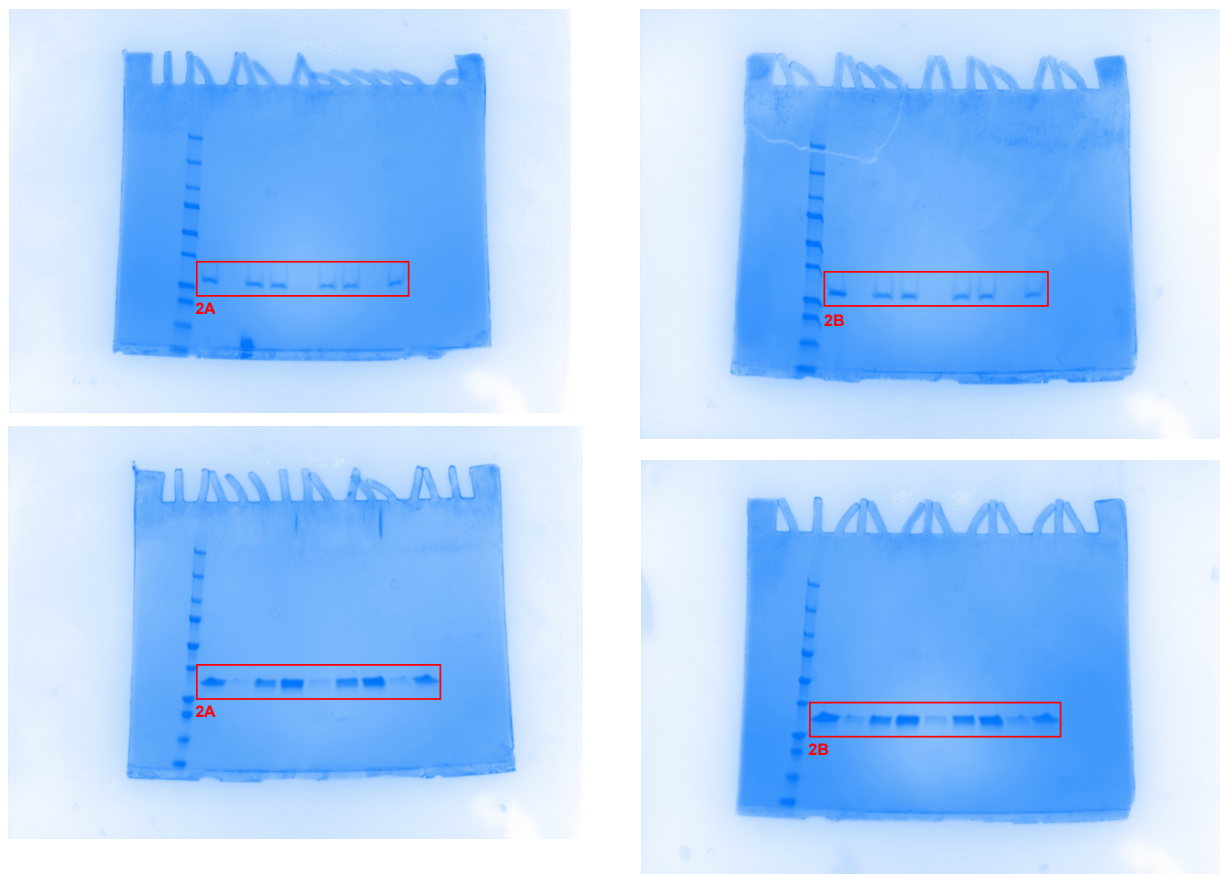

**Fig. 2 - figure supplements 2A and 2B.** (Left top) Precentrifugation control, supernatant, and pelleted fractions of 10  $\mu$ M ceTIR in 25% PEG 3350, where 0, 1, or 2% 1,6-hexanediol was added after precipitate formation. (Left bottom) Precentrifugation control, supernatant, and pelleted fractions of 10  $\mu$ M ceTIR in 500 mM citrate, where 0, 1, or 2% 1,6-hexanediol was added after precipitate formation. (Right top) Precentrifugation control, supernatant, and pelleted fractions of 10  $\mu$ M ceTIR in 25% PEG 3350, where 0, 1, or 2% 1,6-hexanediol was added before precipitate formation. (Right bottom) Precentrifugation control, supernatant, and pelleted fractions of 10  $\mu$ M ceTIR in 500 mM citrate, where 0, 1, or 2% 1,6-hexanediol was added before precipitate formation.
