# Supplementary material for: Pathogen infection and cholesterol deficiency activate the C. elegans p38 immune pathway through a TIR-1/SARM1 phase transition
Source: eLife journal article supplement (doi:10.7554/elife.74206), 2022-01-31
Supplement: data1 [file elife-74206-data1-v2.zip]

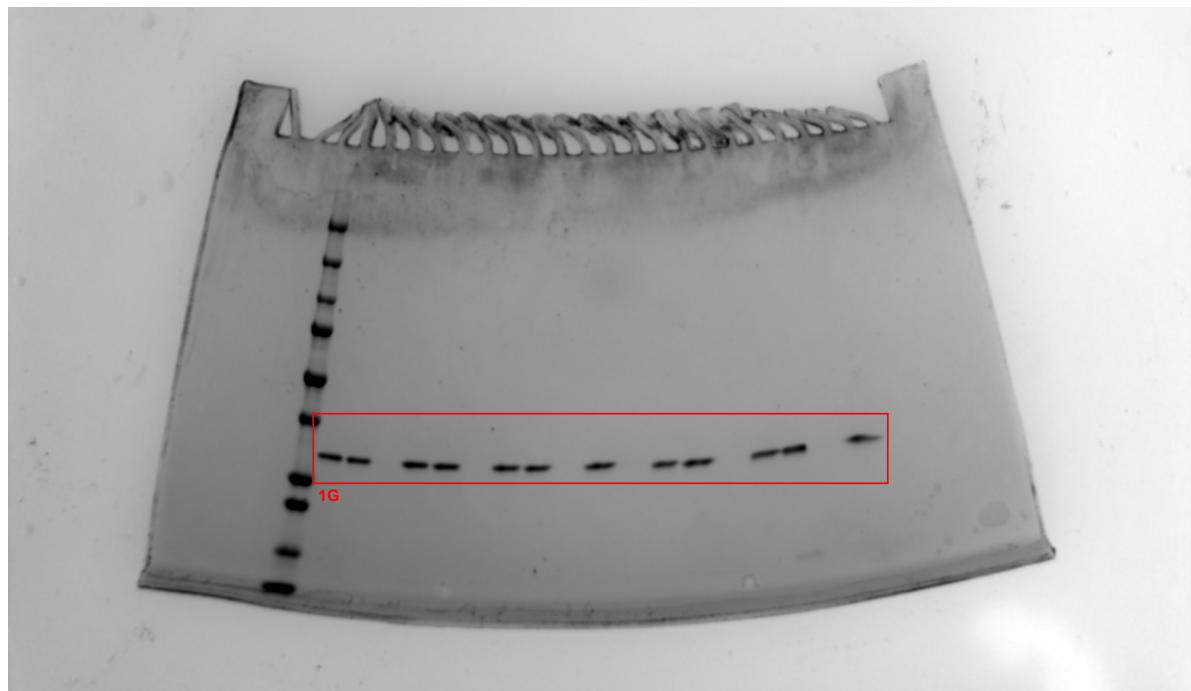

**Figure 2 - figure supplement 1G.** Precentrifugation control, supernatant, and pelleted fractions of 5  $\mu\text{M}$  ceTIR in 0, 125, 250, 500, 750, and 1000 mM citrate.
