# Supplementary material for: Pathogen infection and cholesterol deficiency activate the C. elegans p38 immune pathway through a TIR-1/SARM1 phase transition
Source: eLife journal article supplement (doi:10.7554/elife.74206), 2022-01-31
Supplement: data1 [file elife-74206-data1-v2.zip]

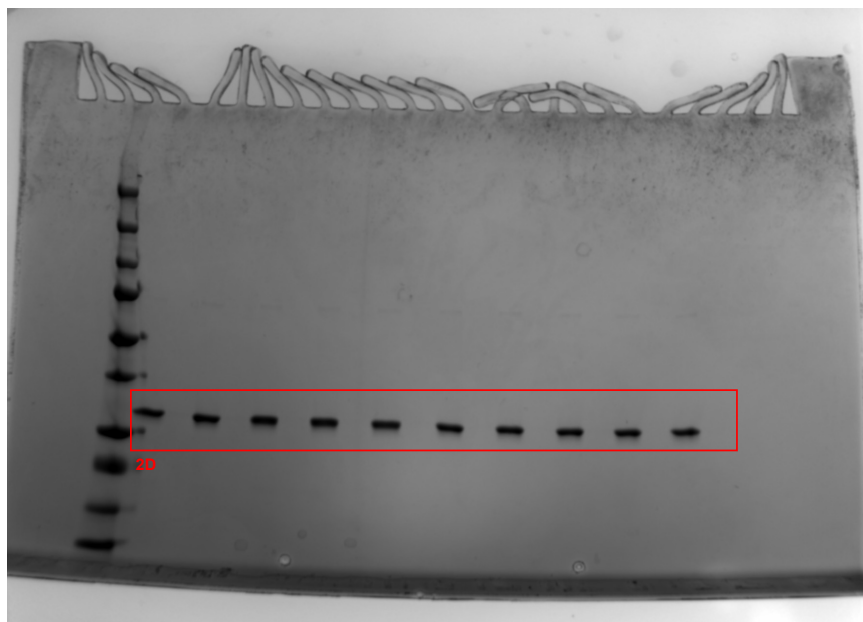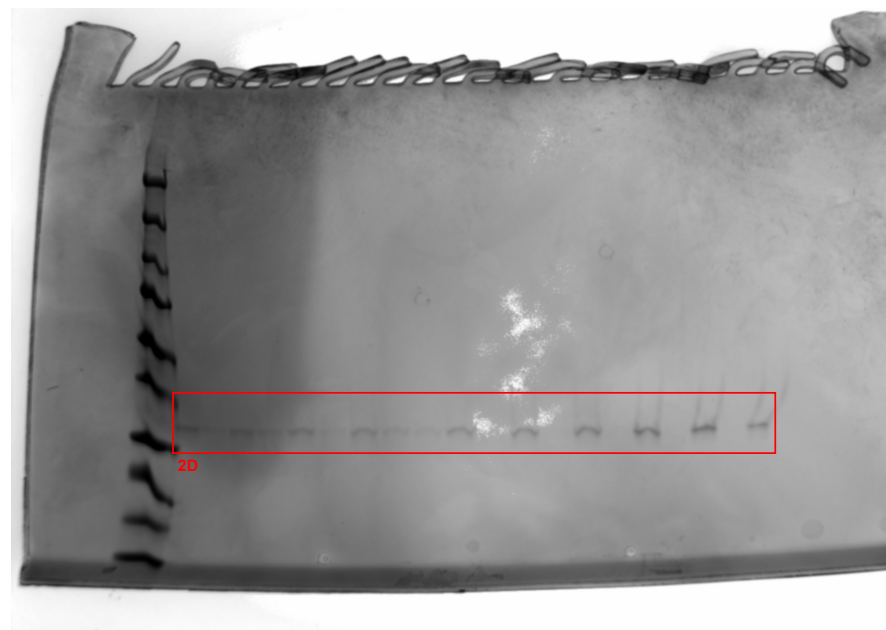

**Fig. 2 - figure supplement 2D** (Left) Supernatant and pellet fractions of 5  $\mu\text{M}$  ceTIR in the absence of 25% PEG 3350, where pH increases from 4.5-9. (Right) Supernatant and pellet fraction of 5  $\mu\text{M}$  ceTIR in the presence of 25% PEG 3350, where pH increases from 4.5-9.
