# Supplementary material for: Pathogen infection and cholesterol deficiency activate the C. elegans p38 immune pathway through a TIR-1/SARM1 phase transition
Source: eLife. 2022 Jan 31;11:e74206. doi: 10.7554/eLife.74206 (PMC8923663; doi:10.7554/eLife.74206)
Supplement: Figure 1—source data 1. [file elife-74206-fig1-data1.xlsx]

## Sheet: Sheet1
Figure 1B. Quantification of the number of TIR-1::wrmScarlet puncta present in the last posterior pair of intestinal epithelial cells.
wild-type uninfected Control RNAi		wild-type P. aeruginosa infected Control RNAi		wild-type uninfected tir-1(RNAi)		wild-type P. aeruginosa infected tir-1(RNAi)
TIR-1::wrmScarlet puncta		TIR-1::wrmScarlet puncta		TIR-1::wrmScarlet puncta		TIR-1::wrmScarlet puncta		two-way ANOVA
1		27		0		1		Tukey's multiple comparisons test	Predicted (LS) mean diff.	95.00% CI of diff.	Below threshold?	Summary	Adjusted P Value
0		3		1		0
0		11		0		3		Control RNAi:Uninfected vs. Control RNAi:P. aeruginosa infected	-9.356	-16.07 to -2.643	Yes	**	0.0043
0		11				1		Control RNAi:Uninfected vs. tir-1(RNAi):P. aeruginosa infected	-1.578	-8.291 to 5.135	No	ns	0.9135
0		8				1		Control RNAi:P. aeruginosa infected vs. tir-1(RNAi):P. aeruginosa infected	7.778	2.104 to 13.45	Yes	**	0.005
		7				1		tir-1(RNAi):Uninfected vs. tir-1(RNAi):P. aeruginosa infected	-1.444	-9.468 to 6.579	No	ns	0.9582
		7				5
		7				2
		5				2		Test details	Predicted (LS) mean 1	Predicted (LS) mean 2	Predicted (LS) mean diff.	SE of diff.	N1	N2	q	DF
								Control RNAi:Uninfected vs. Control RNAi:P. aeruginosa infected	0.2	9.556	-9.356	2.417	5	9	5.473	22
								Control RNAi:Uninfected vs. tir-1(RNAi):P. aeruginosa infected	0.2	1.778	-1.578	2.417	5	9	0.923	22
								Control RNAi:P. aeruginosa infected vs. tir-1(RNAi):P. aeruginosa infected	9.556	1.778	7.778	2.043	9	9	5.384	22
								tir-1(RNAi):Uninfected vs. tir-1(RNAi):P. aeruginosa infected	0.3333	1.778	-1.444	2.889	3	9	0.707	22
