# Supplementary material for: Pathogen infection and cholesterol deficiency activate the C. elegans p38 immune pathway through a TIR-1/SARM1 phase transition
Source: eLife. 2022 Jan 31;11:e74206. doi: 10.7554/eLife.74206 (PMC8923663; doi:10.7554/eLife.74206)
Supplement: Figure 1—source data 2. [file elife-74206-fig1-data2.xlsx]

## Sheet: Sheet1
Figure 1F. Quantification of p38 immunoblot analysis of lysates from the indicated genotypes.
wild-type	tir-1ΔSAM	tir-1 G747P	tir-1 H833A	tir-1 E788A	tir-1(qd4)	nsy-1(ag3)		one-way ANOVA
1.33915	0.268401	0.188333	0.19803	0.203855	0.322984	0.0126545		Dunnett's multiple comparisons test	Mean Diff.	95.00% CI of diff.	Below threshold?	Summary	Adjusted P Value	A-?
1.77743	0.392508	0.302641	0.177256	0.21215	0.182017	0.00954224		wild-type vs. tir-1ΔSAM	1.089	0.6812 to 1.498	Yes	****	<0.0001	B	tir-1ΔSAM
1.08257	0.269849	0.356015	0.312288	0.412546	0.610416	0.113106		wild-type vs. tir-1 G747P	1.117	0.7092 to 1.526	Yes	****	<0.0001	C	tir-1 G747P
								wild-type vs. tir-1 H833A	1.171	0.7623 to 1.579	Yes	****	<0.0001	D	tir-1 H833A
								wild-type vs. tir-1 E788A	1.124	0.7153 to 1.532	Yes	****	<0.0001	E	tir-1 E788A
								wild-type vs. tir-1(qd4)	1.028	0.6197 to 1.436	Yes	****	<0.0001	F	tir-1(qd4)
								wild-type vs. nsy-1(ag3)	1.355	0.9464 to 1.763	Yes	****	<0.0001	G	nsy-1(ag3)
								Test details	Mean 1	Mean 2	Mean Diff.	SE of diff.	n1	n2	q	DF
								wild-type vs. tir-1ΔSAM	1.4	0.3103	1.089	0.1402	3	3	7.773	14
								wild-type vs. tir-1 G747P	1.4	0.2823	1.117	0.1402	3	3	7.972	14
								wild-type vs. tir-1 H833A	1.4	0.2292	1.171	0.1402	3	3	8.351	14
								wild-type vs. tir-1 E788A	1.4	0.2762	1.124	0.1402	3	3	8.016	14
								wild-type vs. tir-1(qd4)	1.4	0.3718	1.028	0.1402	3	3	7.334	14
								wild-type vs. nsy-1(ag3)	1.4	0.0451	1.355	0.1402	3	3	9.665	14
