# Supplementary material for: Pathogen infection and cholesterol deficiency activate the C. elegans p38 immune pathway through a TIR-1/SARM1 phase transition
Source: eLife. 2022 Jan 31;11:e74206. doi: 10.7554/eLife.74206 (PMC8923663; doi:10.7554/eLife.74206)
Supplement: Figure 2—figure supplement 1—source data 1. [file elife-74206-fig2-figsupp1-data1.xlsx]

## Sheet: Sheet1
Figure 2 - figure supplement 1A. Enzyme concentration dependence in presence and absence of either 25% PEG 3350 or 500 mM sodium citrate.
	No additive		25% PEG 3350		500 mM citrate
[ceTIR] (µM)	Mean	SEM	Mean	SEM	Mean	SEM
32.4	0.01649	0.000835	-	-	-	-
30	0.01622	0.001142	-	-	-	-
25	0.01062	0.0003489	-	-	-	-
20	0.005213	0.0002658	-	-	-	-
15	0.00239	0.0001931	0.6779	0.004915	0.3442	0.00262
10	0.001977	0.00055	0.496	0.001388	-	-
7.5	-	-	-	-	0.2136	0.001179
5	0.002911	0.0005452	0.2918	0.001295	0.1541	0.0005389
2.5	-	-	0.1291	0.0009203	0.07665	0.0003459
1	-	-	0.01907	0.001409	0.02791	0.0008952
0.5	-	-	-1.859e-05	0.0007691	-	-
0	0.0003602	0.000198	-	-	0.001817	0.0002265
