# Supplementary material for: Pathogen infection and cholesterol deficiency activate the C. elegans p38 immune pathway through a TIR-1/SARM1 phase transition
Source: eLife. 2022 Jan 31;11:e74206. doi: 10.7554/eLife.74206 (PMC8923663; doi:10.7554/eLife.74206)
Supplement: Figure 2—figure supplement 1—source data 2. [file elife-74206-fig2-figsupp1-data2.xlsx]

## Sheet: Sheet1
Figure 2 - figure supplement 1B. Dose dependency of citrate on the NADase activity of TIR.
[citrate] mM	Velocity (µM/s)
0	0.000284	0.000104
15.625	0.000204	0.000384
31.25	0.00034	0.000725
62.5	0.00025	0
125	0	0
250	0.066707	0.064039
500	0.063578	0.059787
1000	0.09297	0.087482
