# Supplementary material for: Pathogen infection and cholesterol deficiency activate the C. elegans p38 immune pathway through a TIR-1/SARM1 phase transition
Source: eLife. 2022 Jan 31;11:e74206. doi: 10.7554/eLife.74206 (PMC8923663; doi:10.7554/eLife.74206)
Supplement: Figure 2—figure supplement 1—source data 3. [file elife-74206-fig2-figsupp1-data3.xlsx]

## Sheet: Sheet1
Figure 2 - figure supplement 1C. Steady-state kinetic analysis of 2.5 μM TIR incubated in 0-1000 mM sodium citrate.
	0 mM citrate		125 mM citrate		250 mM citrate		500 mM citrate		750 mM citrate		1000 mM citrate
[ENAD] (µM)	Mean	SEM	Mean	SEM	Mean	SEM	Mean	SEM	Mean	SEM	Mean	SEM
4000	0.000621	0.000131425	0	0.00136532	0.001538	0.00197682	0.150983	0.00761951	0.177921	0.0100493	0.166446	0.0102983
2000	0	0.000220702	0	0.000755616	0	0.00097624	0.16354	0.00208184	0.170315	0.00117142	0.182694	0.00935648
1000	0	0.000277709	0	0.00055435	0	0.00211901	0.136518	0.00776969	0.159131	0.00543479	0.165585	0.010245
500	0	0.00039567	0	0.000204049	1.82e-05	0.000119108	0.091351	0.00358413	0.116903	0.00322772	0.115962	0.00604698
250	5.69e-05	2.61016e-05	0	0.000126343	2.29e-05	0.000200162	0.053728	0.00197334	0.071	7.47002e-05	0.06891	0.00242569
125	0.000108	0.000271182	0	0.00026588	0	0.000187988	0.027662	0.00108034	0.041742	0.000589802	0.038963	0.00135955
62.5	0	0.000946295	0	0.000120318	0	4.19149e-05	0.012729	0.000504044	0.019356	0.000343912	0.01853	0.000863419
0	0.000312	4.37345e-06	6.92e-05	6.65722e-05	0	5.61741e-05	0	6.00529e-05	0.000164	0.000185943	0.000208	2.73651e-05
