# Supplementary material for: Pathogen infection and cholesterol deficiency activate the C. elegans p38 immune pathway through a TIR-1/SARM1 phase transition
Source: eLife. 2022 Jan 31;11:e74206. doi: 10.7554/eLife.74206 (PMC8923663; doi:10.7554/eLife.74206)
Supplement: Figure 2—figure supplement 1—source data 4. [file elife-74206-fig2-figsupp1-data4.xlsx]

## Sheet: Sheet1
Figure 2 - figure supplement 1G. NADase activity of TIR protein in each fraction and at each concentration of citrate.
	Precentrifugation		Supernatant		Pellet
0 mM citrate	0.000134	0.00033	0	0	0	0
125 mM citrate	0	0	0	0	0	0.001135
250 mM citrate	0	0	0.000605	0	0.001224	0
500 mM citrate	0.080292	0.076471	0	0	0.044787	0.051544
750 mM citrate	0.091911	0.085614	0.002805	0.001651	0.055072	0.054098
1000 mM citrate	0.097455	0.087893	0.000904	0	0.05474	0.051924
