# Supplementary material for: Pathogen infection and cholesterol deficiency activate the C. elegans p38 immune pathway through a TIR-1/SARM1 phase transition
Source: eLife. 2022 Jan 31;11:e74206. doi: 10.7554/eLife.74206 (PMC8923663; doi:10.7554/eLife.74206)
Supplement: Figure 2—figure supplement 1—source data 5. [file elife-74206-fig2-figsupp1-data5.xlsx]

## Sheet: Sheet1
Figure 2 - figure supplement 1H. Steady-state kinetic analysis of TIR wild-type, oligomerization mutant (TIRG747P, TIRH833A), and catalytic mutants (TIRE788Q and TIRE788A) in 500 mM sodium citrate.
[ENAD] (µM)	WT			G747P			E788A			E788Q			H833A
4000	0.118061	0.124733	0.127333	0	0	0	0	0	0	0	0	0	0	0	0
2000	0.146795	0.151305	0.148216	0	0	0	0	0	0	0	0	0	0	0	0
1000	0.136707	0.128341	0.131967	0	0	0	0	0	0	0	0	0	0	0	0
500	0.090745	0.094302	0.097351	0	0	0	0	0	0	0	0	0	0	0	0
250	0.05545	0.057374	0.057163	0	0	0	0	0	0	0	0	0	0	0	0
125	0.03244	0.032253	0.033565	0	0	0	0	0	0	0	0	0	0	0	0
62.5	0.016598	0.01661	0.016962	0	0	0	0	0	0	0	0	0	0	0	0
0	0.000228	9.92e-05	0.000143	0	0	0	0	0	0	0	0	0	0	0	0
