# Supplementary material for: Pathogen infection and cholesterol deficiency activate the C. elegans p38 immune pathway through a TIR-1/SARM1 phase transition
Source: eLife. 2022 Jan 31;11:e74206. doi: 10.7554/eLife.74206 (PMC8923663; doi:10.7554/eLife.74206)
Supplement: Figure 2—figure supplement 1—source data 6. [file elife-74206-fig2-figsupp1-data6.xlsx]

## Sheet: Sheet1
Figure 2 - figure supplement 1I. Quantification of SDS-PAGE analysis of TIR: wild-type, oligomerization mutant (TIRG747P) and catalytic mutant (TIRE788Q), precipitation in the presence of 500 mM sodium citrate.
WT	G747P	E788Q			Dunnett's multiple comparisons test	Mean Diff.	95.00% CI of diff.	Below threshold?	Summary	Adjusted P Value	A-?
90.1683	78.8838	82.1475			WT vs. G747P	22.4	0.2553 to 44.54	Yes	*	0.0473	B	G747P
74.7308	43.0736	96.4506			WT vs. E788Q	-8.873	-31.02 to 13.27	No	ns	0.5892	C	E788Q
82.3433	64.3002	87.9535
81.6361	53.0231	97.818			Test details	Mean 1	Mean 2	Mean Diff.	SE of diff.	n1	n2	q	DF
					WT vs. G747P	82.22	59.82	22.4	8.254	4	4	2.714	12
					WT vs. E788Q	82.22	91.09	-8.873	8.254	4	4	1.075	12
