# Supplementary material for: Pathogen infection and cholesterol deficiency activate the C. elegans p38 immune pathway through a TIR-1/SARM1 phase transition
Source: eLife. 2022 Jan 31;11:e74206. doi: 10.7554/eLife.74206 (PMC8923663; doi:10.7554/eLife.74206)
Supplement: Figure 2—figure supplement 1—source data 7. [file elife-74206-fig2-figsupp1-data7.xlsx]

## Sheet: Sheet1
Figure 2 - figure supplement 1J. Quantification of SDS-PAGE analysis of TIR: wild-type and catalytic mutant (TIRE788A), precipitation in the presence of 500 mM sodium citrate.
WT	E788A				Unpaired t test
69.8038	95.326				P value	0.0007
65.3796	86.6349				P value summary	***
77.418	92.1456				Significantly different (P < 0.05)?	Yes
72.8852	91.6189				One- or two-tailed P value?	Two-tailed
					t, df	t=6.454, df=6
