# Supplementary material for: Pathogen infection and cholesterol deficiency activate the C. elegans p38 immune pathway through a TIR-1/SARM1 phase transition
Source: eLife. 2022 Jan 31;11:e74206. doi: 10.7554/eLife.74206 (PMC8923663; doi:10.7554/eLife.74206)
Supplement: Figure 2—source data 1. [file elife-74206-fig2-data1.xlsx]

## Sheet: Sheet1
Figure 2A. NADase activity of purified TIR at increasing TIR protein concentrations.
[TIR] (µM)	Velocity (µM/s)
32.4	0.013626	0.019356
30	0.023493	0.008942
25	0.009018	0.01222
20	0.003979	0.006447
15	0.002232	0.002547
10	0.003998	-4.4e-05
5	0.000538	0.00528448
0	0.000508	0.000212
