# Supplementary material for: Pathogen infection and cholesterol deficiency activate the C. elegans p38 immune pathway through a TIR-1/SARM1 phase transition
Source: eLife. 2022 Jan 31;11:e74206. doi: 10.7554/eLife.74206 (PMC8923663; doi:10.7554/eLife.74206)
Supplement: Figure 2—source data 2. [file elife-74206-fig2-data2.xlsx]

## Sheet: Sheet1
Figure 2B. NADase activity of 2.5 μM TIR incubated in the presence of 25% (w/v) of macro- (PEG 8000, PEG 3350 and dextran) and micro- (sucrose and glycerol) viscogens.
PEG 3350	PEG 8000	Dextran	Sucrose	Glycerol	None
0.02485	0.007759	0.003096	0.00014	0.001949	0.000667
0.0162415	0.021627	0.003663	0	0.001403	0.000698
