# Supplementary material for: Pathogen infection and cholesterol deficiency activate the C. elegans p38 immune pathway through a TIR-1/SARM1 phase transition
Source: eLife. 2022 Jan 31;11:e74206. doi: 10.7554/eLife.74206 (PMC8923663; doi:10.7554/eLife.74206)
Supplement: Figure 2—source data 3. [file elife-74206-fig2-data3.xlsx]

## Sheet: Sheet1
Figure 2C. Dose dependency of macroviscogens on the NADase activity of TIR.
PEG %	PEG 8000			PEG 3350			PEG 1500			PEG 400
0	0	0		0	0		0	0		0	0
10	0.001141	0		0.000972	0.000347		0	5.69e-06		0	0
20	0.084995	0.072451		0.106431	0.123759		0	0		0.001915	0.002265
30	0.052691	0.084243		0.092224	0.108848		0	0		0	0
