# Supplementary material for: Pathogen infection and cholesterol deficiency activate the C. elegans p38 immune pathway through a TIR-1/SARM1 phase transition
Source: eLife. 2022 Jan 31;11:e74206. doi: 10.7554/eLife.74206 (PMC8923663; doi:10.7554/eLife.74206)
Supplement: Figure 2—source data 4. [file elife-74206-fig2-data4.xlsx]

## Sheet: Sheet1
Figure 2D. Steady-state kinetic analysis of 2.5 μM TIR incubated in 0-30% (w/v) of PEG 3350.
[ENAD] (µM)	0% PEG 3350		10% PEG 3350		15% PEG 3350		20% PEG 3350		25% PEG 3350		30% PEG 3350
4000	0.000489	0.000752072	0	0	0.007704	0.009477	0.03444	0.044374	0.081193	0.071025	0.099397	0.088165
2000	0	0	0	0	0.007492	0.010649	0.030554	0.024275	0.061148	0.063178	0.095359	0.093166
1000	0	0	0	0	0.002051	0.008825	0.023338	0.020037	0.056785	0.054946	0.082486	0.076748
500	0	0.000222	0.002193	0.000654	0.00481	0.008823	0.015583	0.017191	0.037888	0.035106	0.057205	0.060138
250	8.3e-05	3.08e-05	0.002129	0.00186	0.004002	0.005602	0.00921	0.008835	0.023741	0.023465	0.03737	0.034797
125	0	0.00038	0.004756	0.002536	0.001554	0.002345	0.006072	0.005389	0.012976	0.012748	0.01849	0.01836
62.5	0	0.000357	0	5.07e-05	0.000544	0.001377	0.002198	0.002365	0.007163	0.006609	0.00933	0.008519
0	0.000317	0.000308	0.000208	0.000396	0.000377	0.001656	0.000184	5.63e-05	-3e-05	-9.9e-05	0.000231	0.000274
