# Supplementary material for: Pathogen infection and cholesterol deficiency activate the C. elegans p38 immune pathway through a TIR-1/SARM1 phase transition
Source: eLife. 2022 Jan 31;11:e74206. doi: 10.7554/eLife.74206 (PMC8923663; doi:10.7554/eLife.74206)
Supplement: Figure 2—source data 5. [file elife-74206-fig2-data5.xlsx]

## Sheet: Sheet1
Figure 2H. NADase activity of TIR protein in each fraction and at each concentration of PEG 3350.
	0% PEG 3350		10% PEG 3350		17.5% PEG 3350		25% PEG 3350
Precentrifugation	0.000186	0.000304	0.000266	0.001609	0.047201	0.036013	0.124686	0.123604
Supernatant	0.000412	0.000279	0.001317	0.000147	0.001346	0.000923	0.003386	0.000729
Pellet	9.13e-05	0.000167	0.001577	0.002044	0.028015	0.025494	0.123446	0.064937
