# Supplementary material for: Pathogen infection and cholesterol deficiency activate the C. elegans p38 immune pathway through a TIR-1/SARM1 phase transition
Source: eLife. 2022 Jan 31;11:e74206. doi: 10.7554/eLife.74206 (PMC8923663; doi:10.7554/eLife.74206)
Supplement: Figure 2—source data 6. [file elife-74206-fig2-data6.xlsx]

## Sheet: Sheet1
Figure 2I. Steady-state kinetic analysis of TIR wild-type, oligomerization mutant (TIRG747P, TIRH833A), and catalytic mutants (TIRE788Q and TIRE788A) in 25% PEG 3350.
[ENAD] (µM)	WT			G747P			E788A			E788Q			H833A
2000	0.237124	0.248144	0.24022	0	0	0	0	0	0.000363	0	0	0	0.005519	0.001193	0.005591
1000	0.213392	0.223349	0.209046	0	0.000399	0.000474	0	0	0	0	0	0	0.00334	0	0.005535
500	0.153005	0.14698	0.147939	0	0	0.00085	0	0	0.000788	0	0	0	0.00079	0	0.00456
250	0.09157	0.091379	0.091422	0	0	0	0	0	0	0	0	0	1.6e-05	0.000581	0.001541
125	0.050015	0.050121	0.048369	0.000454	0	0.000554	0	0	0.000301	0	0	0	0.000276	9.38e-05	0.001047
62.5	0.025199	0.025978	0.026142	0	0	0	0	0	0	0	0	0	0.000126	0	0.000348
31.25	0.013613	0.013707	0.01361	0	3.36e-05	0	0	0	0	0	0	-0.00021	0.000127	0	0.000733
0	0	2.76e-05	0	0.000158	8.34e-06	0	2.64e-05	9.91e-05	0	6.85e-05	0.000127	8.73e-06	0.000155	9.12e-05	0.000239
