# Supplementary material for: Pathogen infection and cholesterol deficiency activate the C. elegans p38 immune pathway through a TIR-1/SARM1 phase transition
Source: eLife. 2022 Jan 31;11:e74206. doi: 10.7554/eLife.74206 (PMC8923663; doi:10.7554/eLife.74206)
Supplement: Figure 2—source data 7. [file elife-74206-fig2-data7.xlsx]

## Sheet: Sheet1
Figure 2J. Quantification of SDS-PAGE analysis of TIR: wild-type, oligomerization mutant (TIRG747P) and catalytic mutant (TIRE788Q), precipitation in the presence of 25% PEG 3350.
WT	G747P	E788Q			one-way ANOVA
PEG 3350	PEG 3350	PEG 3350			Dunnett's multiple comparisons test	Mean Diff.	95.00% CI of diff.	Below threshold?	Summary	Adjusted P Value	A-?
99.1052	83.6121	100			WT vs. G747P	25.23	13.57 to 36.89	Yes	***	0.0003	B	G747P
98.2606	63.3973	99.7993			WT vs. E788Q	-1.207	-12.86 to 10.45	No	ns	0.9848	C	E788Q
98.3859	80.9106	98.3323
97.4019	64.3191	99.8487			Test details	Mean 1	Mean 2	Mean Diff.	SE of diff.	n1	n2	q	DF
					WT vs. G747P	98.29	73.06	25.23	4.345	4	4	5.806	12
					WT vs. E788Q	98.29	99.5	-1.207	4.345	4	4	0.2777	12
