# Supplementary material for: Pathogen infection and cholesterol deficiency activate the C. elegans p38 immune pathway through a TIR-1/SARM1 phase transition
Source: eLife. 2022 Jan 31;11:e74206. doi: 10.7554/eLife.74206 (PMC8923663; doi:10.7554/eLife.74206)
Supplement: Figure 2—source data 8. [file elife-74206-fig2-data8.xlsx]

## Sheet: Sheet1
Figure 2K. Quantification of SDS-PAGE analysis of TIR: wild-type and catalytic mutant (TIRE788A), precipitation in the presence of 25% PEG 3350.
WT	E788A				Unpaired t test
69.2197	94.5326				P value	0.3268
88.5811	95.0018				P value summary	ns
99.8647	98.2097				Significantly different (P < 0.05)?	No
95.8443	95.023				One- or two-tailed P value?	Two-tailed
					t, df	t=1.067, df=6
