# Supplementary material for: Pathogen infection and cholesterol deficiency activate the C. elegans p38 immune pathway through a TIR-1/SARM1 phase transition
Source: eLife. 2022 Jan 31;11:e74206. doi: 10.7554/eLife.74206 (PMC8923663; doi:10.7554/eLife.74206)
Supplement: Figure 2—source data 9. [file elife-74206-fig2-data9.xlsx]

## Sheet: Sheet1
Figure 2L. Effect of 1,6-hexanediol on TIR NADase activity.
								Multiple unpaired t tests
	0% 1,6-hexanediol			2% 1,6-hexanediol					Discovery?	P value	Mean of 0% 1,6-hexanediol	Mean of 2% 1,6-hexanediol	Difference	SE of difference	t ratio	df	q value
Pure	6.99714e-05	7.48e-05	8.55e-05	2.55e-05	1.18e-05	3.27e-05		Pure	Yes	0.002219	7.676e-05	2.333e-05	5.342e-05	7.657e-06	6.977	4	0.002241
PEG3350	0.0393648	0.041661	0.043754	0.024208	0.022796	0.023657		PEG3350	Yes	0.000172	0.04159	0.02355	0.01804	0.001332	13.54	4	0.000279
Citrate	0.0350236	0.03704	0.037513	0.013599	0.014534	0.009216		Citrate	Yes	0.000184	0.03653	0.01245	0.02408	0.001808	13.31	4	0.000279
