# Supplementary material for: Pathogen infection and cholesterol deficiency activate the C. elegans p38 immune pathway through a TIR-1/SARM1 phase transition
Source: eLife. 2022 Jan 31;11:e74206. doi: 10.7554/eLife.74206 (PMC8923663; doi:10.7554/eLife.74206)
Supplement: Figure 2—source data 10. [file elife-74206-fig2-data10.xlsx]

## Sheet: Sheet1
Figure 2M. NADase activity of TIR protein incubated with either 25% PEG 3350 or 500 mM citrate before (precentrifugation) and after centrifugation, the supernatant and precipitant fractions.
	PEG 3350				Citrate
Precentrifugation	0.027595	0.024143	-	-	0.009743	0.01007	-	-
Supernatant	0.002259	0.003241	-	-	-	0.00065	0.000353	0.000346
Precipitate+Buffer	0.005314	0.004401	-	-	0.009568	0.008158	-	-
Precipitate+Additive	0.026709	0.02032	-	-	0.011314	0.008832	-	-
