# Supplementary material for: Pathogen infection and cholesterol deficiency activate the C. elegans p38 immune pathway through a TIR-1/SARM1 phase transition
Source: eLife. 2022 Jan 31;11:e74206. doi: 10.7554/eLife.74206 (PMC8923663; doi:10.7554/eLife.74206)
Supplement: Figure 3—source data 1. [file elife-74206-fig3-data1.xlsx]

## Sheet: Sheet1
Figure 3C. qRT-PCR data of the indicated innate immune effector genes in wild-type C. elegans growing in the presence (+5 μg/mL) and absence (+0 μg/mL) of supplemented cholesterol.
Gene	5 μg/mL cholesterol			0 μg/mL cholesterol				T24B8.5			irg-4			irg-5			K08D8.4
T24B8.5	0.988	0.974	0.977	3.197	2.926	3.14		Unpaired t test with Welch's correction			Unpaired t test with Welch's correction			Unpaired t test with Welch's correction			Unpaired t test with Welch's correction
irg-4	1.083	0.995	0.872	2.887	2.835	2.846		P value	0.0015		P value	0.0006		P value	0.003		P value	0.0013
irg-5	1.132	0.959	0.866	3.358	2.823	2.811		P value summary	**		P value summary	***		P value summary	**		P value summary	**
K08D8.4	1.004	0.928	1.009	1.81	1.682	1.632		Significantly different (P < 0.05)?	Yes		Significantly different (P < 0.05)?	Yes		Significantly different (P < 0.05)?	Yes		Significantly different (P < 0.05)?	Yes
lys-2	0.998	0.949	0.993	1.364	1.372	1.314		One- or two-tailed P value?	Two-tailed		One- or two-tailed P value?	Two-tailed		One- or two-tailed P value?	Two-tailed		One- or two-tailed P value?	Two-tailed
								Welch-corrected t, df	t=25.52, df=2.011		Welch-corrected t, df	t=29.63, df=2.266		Welch-corrected t, df	t=10.24, df=2.722		Welch-corrected t, df	t=12.31, df=2.923
