# Supplementary material for: Pathogen infection and cholesterol deficiency activate the C. elegans p38 immune pathway through a TIR-1/SARM1 phase transition
Source: eLife. 2022 Jan 31;11:e74206. doi: 10.7554/eLife.74206 (PMC8923663; doi:10.7554/eLife.74206)
Supplement: Figure 3—source data 2. [file elife-74206-fig3-data2.xlsx]

## Sheet: Sheet1
Figure 3I. qRT-PCR data of T24B8.5 in wild-type and nhr-8(hd117) mutant animals grown on standard nematode growth media (+5 μg/mL cholesterol) in the presence or absence of 0.1% Tergitol, as indicated.
	Control			+0.1% Tergitol
wild-type	1.15	0.876	0.993	0.809	0.794	0.708
nhr-8(hd117)	22.76	22.136	15.26	0.784	0.879	1.117
two-way ANOVA
Tukey's multiple comparisons test	Mean Diff.	95.00% CI of diff.	Below threshold?	Summary	Adjusted P Value
wild-type:Control vs. wild-type:+0.1% Tergitol	0.236	-5.213 to 5.685	No	ns	0.999
wild-type:Control vs. nhr-8(hd117):Control	-19.05	-24.49 to -13.60	Yes	****	<0.0001
wild-type:Control vs. nhr-8(hd117):+0.1% Tergitol	0.07967	-5.369 to 5.529	No	ns	>0.9999
wild-type:+0.1% Tergitol vs. nhr-8(hd117):Control	-19.28	-24.73 to -13.83	Yes	****	<0.0001
wild-type:+0.1% Tergitol vs. nhr-8(hd117):+0.1% Tergitol	-0.1563	-5.605 to 5.293	No	ns	0.9997
nhr-8(hd117):Control vs. nhr-8(hd117):+0.1% Tergitol	19.13	13.68 to 24.57	Yes	****	<0.0001
Test details	Mean 1	Mean 2	Mean Diff.	SE of diff.	N1	N2	q	DF
wild-type:Control vs. wild-type:+0.1% Tergitol	1.006	0.7703	0.236	1.702	3	3	0.1962	8
wild-type:Control vs. nhr-8(hd117):Control	1.006	20.05	-19.05	1.702	3	3	15.83	8
wild-type:Control vs. nhr-8(hd117):+0.1% Tergitol	1.006	0.9267	0.07967	1.702	3	3	0.06621	8
wild-type:+0.1% Tergitol vs. nhr-8(hd117):Control	0.7703	20.05	-19.28	1.702	3	3	16.03	8
wild-type:+0.1% Tergitol vs. nhr-8(hd117):+0.1% Tergitol	0.7703	0.9267	-0.1563	1.702	3	3	0.1299	8
nhr-8(hd117):Control vs. nhr-8(hd117):+0.1% Tergitol	20.05	0.9267	19.13	1.702	3	3	15.9	8
