# Supplementary material for: Pathogen infection and cholesterol deficiency activate the C. elegans p38 immune pathway through a TIR-1/SARM1 phase transition
Source: eLife. 2022 Jan 31;11:e74206. doi: 10.7554/eLife.74206 (PMC8923663; doi:10.7554/eLife.74206)
Supplement: Figure 3—source data 3. [file elife-74206-fig3-data3.xlsx]

## Sheet: Sheet1
Figure 3J. qRT-PCR data of irg-4 in wild-type and nhr-8(hd117) mutant animals grown on standard nematode growth media (+5 μg/mL cholesterol) in the presence or absence of 0.1% Tergitol, as indicated.
	Control			+0.1% Tergitol
wild-type	1.04	1.043	0.922	3.784	2.932	4.088
nhr-8(hd117)	14.079	16.039	12.03	2.826	3.295	4.336
two-way ANOVA
Tukey's multiple comparisons test	Mean Diff.	95.00% CI of diff.	Below threshold?	Summary	Adjusted P Value
wild-type:Control vs. wild-type:+0.1% Tergitol	-2.6	-5.517 to 0.3178	No	ns	0.0818
wild-type:Control vs. nhr-8(hd117):Control	-13.05	-15.97 to -10.13	Yes	****	<0.0001
wild-type:Control vs. nhr-8(hd117):+0.1% Tergitol	-2.484	-5.401 to 0.4334	No	ns	0.0979
wild-type:+0.1% Tergitol vs. nhr-8(hd117):Control	-10.45	-13.37 to -7.531	Yes	****	<0.0001
wild-type:+0.1% Tergitol vs. nhr-8(hd117):+0.1% Tergitol	0.1157	-2.802 to 3.033	No	ns	0.9992
nhr-8(hd117):Control vs. nhr-8(hd117):+0.1% Tergitol	10.56	7.646 to 13.48	Yes	****	<0.0001
Test details	Mean 1	Mean 2	Mean Diff.	SE of diff.	N1	N2	q	DF
wild-type:Control vs. wild-type:+0.1% Tergitol	1.002	3.601	-2.6	0.911	3	3	4.036	8
wild-type:Control vs. nhr-8(hd117):Control	1.002	14.05	-13.05	0.911	3	3	20.25	8
wild-type:Control vs. nhr-8(hd117):+0.1% Tergitol	1.002	3.486	-2.484	0.911	3	3	3.856	8
wild-type:+0.1% Tergitol vs. nhr-8(hd117):Control	3.601	14.05	-10.45	0.911	3	3	16.22	8
wild-type:+0.1% Tergitol vs. nhr-8(hd117):+0.1% Tergitol	3.601	3.486	0.1157	0.911	3	3	0.1796	8
nhr-8(hd117):Control vs. nhr-8(hd117):+0.1% Tergitol	14.05	3.486	10.56	0.911	3	3	16.4	8
