# Supplementary material for: Pathogen infection and cholesterol deficiency activate the C. elegans p38 immune pathway through a TIR-1/SARM1 phase transition
Source: eLife. 2022 Jan 31;11:e74206. doi: 10.7554/eLife.74206 (PMC8923663; doi:10.7554/eLife.74206)
Supplement: Figure 3—source data 4. [file elife-74206-fig3-data4.xlsx]

## Sheet: Sheet1
Figure 3K. qRT-PCR data of irg-5 in wild-type and nhr-8(hd117) mutant animals grown on standard nematode growth media (+5 μg/mL cholesterol) in the presence or absence of 0.1% Tergitol, as indicated.
	Control			+0.1% Tergitol
wild-type	1.179	0.874	0.97	2.201	1.268	1.927
nhr-8(hd117)	7.736	9.186	7.921	0.902	2.668	4.127
two-way ANOVA
Tukey's multiple comparisons test	Mean Diff.	95.00% CI of diff.	Below threshold?	Summary	Adjusted P Value
wild-type:Control vs. wild-type:+0.1% Tergitol	-0.791	-3.232 to 1.650	No	ns	0.7335
wild-type:Control vs. nhr-8(hd117):Control	-7.273	-9.714 to -4.833	Yes	****	<0.0001
wild-type:Control vs. nhr-8(hd117):+0.1% Tergitol	-1.558	-3.999 to 0.8826	No	ns	0.2493
wild-type:+0.1% Tergitol vs. nhr-8(hd117):Control	-6.482	-8.923 to -4.042	Yes	***	0.0001
wild-type:+0.1% Tergitol vs. nhr-8(hd117):+0.1% Tergitol	-0.767	-3.208 to 1.674	No	ns	0.7504
nhr-8(hd117):Control vs. nhr-8(hd117):+0.1% Tergitol	5.715	3.275 to 8.156	Yes	***	0.0003
Test details	Mean 1	Mean 2	Mean Diff.	SE of diff.	N1	N2	q	DF
wild-type:Control vs. wild-type:+0.1% Tergitol	1.008	1.799	-0.791	0.7621	3	3	1.468	8
wild-type:Control vs. nhr-8(hd117):Control	1.008	8.281	-7.273	0.7621	3	3	13.5	8
wild-type:Control vs. nhr-8(hd117):+0.1% Tergitol	1.008	2.566	-1.558	0.7621	3	3	2.891	8
wild-type:+0.1% Tergitol vs. nhr-8(hd117):Control	1.799	8.281	-6.482	0.7621	3	3	12.03	8
wild-type:+0.1% Tergitol vs. nhr-8(hd117):+0.1% Tergitol	1.799	2.566	-0.767	0.7621	3	3	1.423	8
nhr-8(hd117):Control vs. nhr-8(hd117):+0.1% Tergitol	8.281	2.566	5.715	0.7621	3	3	10.61	8
