# Supplementary material for: Pathogen infection and cholesterol deficiency activate the C. elegans p38 immune pathway through a TIR-1/SARM1 phase transition
Source: eLife. 2022 Jan 31;11:e74206. doi: 10.7554/eLife.74206 (PMC8923663; doi:10.7554/eLife.74206)
Supplement: Figure 3—source data 5. [file elife-74206-fig3-data5.xlsx]

## Sheet: Sheet1
Figure 3L. qRT-PCR data of K08D8.4 in wild-type and nhr-8(hd117) mutant animals grown on standard nematode growth media (+5 μg/mL cholesterol) in the presence or absence of 0.1% Tergitol, as indicated.
	Control			+0.1% Tergitol
wild-type	1.083	0.985	0.937	0.646	0.564	0.601
nhr-8(hd117)	3.457	3.492	3.164	0.71	0.842	1.037
two-way ANOVA
Tukey's multiple comparisons test	Mean Diff.	95.00% CI of diff.	Below threshold?	Summary	Adjusted P Value
wild-type:Control vs. wild-type:+0.1% Tergitol	0.398	0.06028 to 0.7357	Yes	*	0.0226
wild-type:Control vs. nhr-8(hd117):Control	-2.369	-2.707 to -2.032	Yes	****	<0.0001
wild-type:Control vs. nhr-8(hd117):+0.1% Tergitol	0.1387	-0.1991 to 0.4764	No	ns	0.5795
wild-type:+0.1% Tergitol vs. nhr-8(hd117):Control	-2.767	-3.105 to -2.430	Yes	****	<0.0001
wild-type:+0.1% Tergitol vs. nhr-8(hd117):+0.1% Tergitol	-0.2593	-0.5971 to 0.07838	No	ns	0.1423
nhr-8(hd117):Control vs. nhr-8(hd117):+0.1% Tergitol	2.508	2.170 to 2.846	Yes	****	<0.0001
Test details	Mean 1	Mean 2	Mean Diff.	SE of diff.	N1	N2	q	DF
wild-type:Control vs. wild-type:+0.1% Tergitol	1.002	0.6037	0.398	0.1055	3	3	5.337	8
wild-type:Control vs. nhr-8(hd117):Control	1.002	3.371	-2.369	0.1055	3	3	31.77	8
wild-type:Control vs. nhr-8(hd117):+0.1% Tergitol	1.002	0.863	0.1387	0.1055	3	3	1.86	8
wild-type:+0.1% Tergitol vs. nhr-8(hd117):Control	0.6037	3.371	-2.767	0.1055	3	3	37.11	8
wild-type:+0.1% Tergitol vs. nhr-8(hd117):+0.1% Tergitol	0.6037	0.863	-0.2593	0.1055	3	3	3.478	8
nhr-8(hd117):Control vs. nhr-8(hd117):+0.1% Tergitol	3.371	0.863	2.508	0.1055	3	3	33.63	8
