# Supplementary material for: Pathogen infection and cholesterol deficiency activate the C. elegans p38 immune pathway through a TIR-1/SARM1 phase transition
Source: eLife. 2022 Jan 31;11:e74206. doi: 10.7554/eLife.74206 (PMC8923663; doi:10.7554/eLife.74206)
Supplement: Figure 3—source data 6. [file elife-74206-fig3-data6.xlsx]

## Sheet: Sheet1
Figure 3O. Colony forming units (CFUs) of P. aeruginosa, isolated from the intestines of animals with the indicated genotypes, quantified after 24 hours of bacterial infection.
wild-type	nhr-8(hd117)		Unpaired t test with Welch's correction
3210	576.923		P value	0.0163
4972.73	838		P value summary	*
3745.45	2810.91		Significantly different (P < 0.05)?	Yes
3427.27	2691.11		One- or two-tailed P value?	Two-tailed
1967.27	221.818		Welch-corrected t, df	t=2.673, df=16.57
1426	580
1820	1914.55
387.273	481.818
1285	386
2861.67	158.182
