# Supplementary material for: Pathogen infection and cholesterol deficiency activate the C. elegans p38 immune pathway through a TIR-1/SARM1 phase transition
Source: eLife. 2022 Jan 31;11:e74206. doi: 10.7554/eLife.74206 (PMC8923663; doi:10.7554/eLife.74206)
Supplement: Figure 4—figure supplement 1—source data 1. [file elife-74206-fig4-figsupp1-data1.xlsx]

## Sheet: Sheet1
Figure 4 – figure supplement 1C. Quantification of T24B8.5p::gfp expression in the indicated conditions.
T24B8.5p::gfp Control RNAi	T24B8.5p::gfp;nhr-8(hd117) Control RNAi	T24B8.5p::gfp;nhr-8(hd117) tir-1(RNAi)	T24B8.5p::gfp;nhr-8(hd117) atf-7(RNAi)		one-way ANOVA
306.308	479.15	290.421	372.964		Tukey's multiple comparisons test	Mean Diff.	95.00% CI of diff.	Below threshold?	Summary	Adjusted P Value
201.482	577.451	174.94	253.745		T24B8.5p::gfp Control RNAi vs. T24B8.5p::gfp;nhr-8(hd117) Control RNAi	-176.9	-224.6 to -129.2	Yes	****	<0.0001	A-B
417.49	507.798	271.832	214.776		T24B8.5p::gfp Control RNAi vs. T24B8.5p::gfp atf-7(RNAi)	6.749	-41.49 to 54.99	No	ns	0.9829	A-C
289.272	505.229	277.754	365.911		T24B8.5p::gfp;nhr-8(hd117) Control RNAi vs. T24B8.5p::gfp atf-7(RNAi)	183.7	137.3 to 230.1	Yes	****	<0.0001	B-C
279.73	433.833	195.164	347.062		T24B8.5p::gfp;nhr-8(hd117) Control RNAi vs. T24B8.5p::gfp tir-1(RNAi)	253.7	207.3 to 300.1	Yes	****	<0.0001	B-D
277.151	482.677	281.074	246.904
199.966	499.777	256.42	279.64		Test details	Mean 1	Mean 2	Mean Diff.	SE of diff.	n1	n2	q	DF
268.268	552.082	236.519	341.756		T24B8.5p::gfp Control RNAi vs. T24B8.5p::gfp;nhr-8(hd117) Control RNAi	320.3	497.2	-176.9	18.15	18	21	13.78	75
233.991	429.91	246.974	233.039		T24B8.5p::gfp Control RNAi vs. T24B8.5p::gfp atf-7(RNAi)	320.3	313.5	6.749	18.36	18	20	0.5199	75
357.462	646.428	265.145	287.262		T24B8.5p::gfp;nhr-8(hd117) Control RNAi vs. T24B8.5p::gfp atf-7(RNAi)	497.2	313.5	183.7	17.66	21	20	14.71	75
412.909	419.391	310.672	406.625		T24B8.5p::gfp;nhr-8(hd117) Control RNAi vs. T24B8.5p::gfp tir-1(RNAi)	497.2	243.5	253.7	17.66	21	20	20.32	75
339.593	510.594	232.312	338.992
326.881	534.186	226.463	284.108
320.195	555.508	240.032	322.72
353.089	408.205	255.872	291.959
404.7	494.306	229.174	360.666
441.635	446.981	173.026	304.837
335.003	413.081	244.332	374.938
	482.264	206.669	275.885
	549.488	255.169	366.922
	512.822
