# Supplementary material for: Pathogen infection and cholesterol deficiency activate the C. elegans p38 immune pathway through a TIR-1/SARM1 phase transition
Source: eLife. 2022 Jan 31;11:e74206. doi: 10.7554/eLife.74206 (PMC8923663; doi:10.7554/eLife.74206)
Supplement: Figure 4—source data 1. [file elife-74206-fig4-data1.xlsx]

## Sheet: Sheet1
Figure 4C. Quantification of p38 immunoblot analysis of lysates from wild-type C. elegans grown on standard nematode growth media in the presence (+5 μg/mL cholesterol) and in the absence (+0 μg/mL cholesterol) of supplemented cholesterol.
5 μg/mL cholesterol	0 μg/mL cholesterol		Unpaired t test with Welch's correction
0.989084	1.37603		P value	<0.0001
0.918572	1.46095		P value summary	****
0.912145	1.35673		Significantly different (P < 0.05)?	Yes
0.830133	1.32956		One- or two-tailed P value?	Two-tailed
			Welch-corrected t, df	t=10.85, df=5.891
