# Supplementary material for: Pathogen infection and cholesterol deficiency activate the C. elegans p38 immune pathway through a TIR-1/SARM1 phase transition
Source: eLife. 2022 Jan 31;11:e74206. doi: 10.7554/eLife.74206 (PMC8923663; doi:10.7554/eLife.74206)
Supplement: Figure 4—source data 2. [file elife-74206-fig4-data2.xlsx]

## Sheet: Sheet1
Figure 4F. Quantification of p38 immunoblot analysis of lysates from the indicated C. elegans mutants.
N2	nhr-8(hd117)	nhr8(ok186)			one-way ANOVA
0.0288663	0.50957	1.00029			Dunnett's T3 multiple comparisons test	Mean Diff.	95.00% CI of diff.	Below threshold?	Summary	Adjusted P Value	A-?
0.105987	0.58688	0.982477			N2 vs. nhr-8(hd117)	-0.4664	-0.6534 to -0.2794	Yes	***	0.0009	B	nhr-8(hd117)
0.0859472	0.64416	0.748545			N2 vs. nhr8(ok186)	-0.6845	-1.473 to 0.1041	Yes	*	0.0366	C	nhr8(ok186)
0.119112	0.464959	0.346541
					Test details	Mean 1	Mean 2	Mean Diff.	SE of diff.	n1	n2	t	DF
					N2 vs. nhr-8(hd117)	0.08498	0.5514	-0.4664	0.04457	4	4	10.46	4.408
					N2 vs. nhr8(ok186)	0.08498	0.7695	-0.6845	0.1535	4	4	4.459	3.103
