# Supplementary material for: Pathogen infection and cholesterol deficiency activate the C. elegans p38 immune pathway through a TIR-1/SARM1 phase transition
Source: eLife. 2022 Jan 31;11:e74206. doi: 10.7554/eLife.74206 (PMC8923663; doi:10.7554/eLife.74206)
Supplement: Figure 4—source data 3. [file elife-74206-fig4-data3.xlsx]

## Sheet: Sheet1
Figure 4H. qRT-PCR data of T24B8.5 in the indicated mutant animals grown on standard nematode growth media (+5 μg/mL cholesterol).
wild-type	nhr-8(hd117)	tir-1(qd4)	tir-1(qd4);nhr-8(hd117)		one-way ANOVA
1.1286	87.5737	0.0605	0.0685		Dunnett's T3 multiple comparisons test	Mean Diff.	95.00% CI of diff.	Below threshold?	Summary	Adjusted P Value
0.912	74.0768	0.0731	0.1023		wild-type vs. nhr-8(hd117)	-63.15	-112.9 to -13.42	Yes	**	0.0083	A-B
1.2284	94.5424	0.0941	0.1046		tir-1(qd4) vs. tir-1(qd4);nhr-8(hd117)	-0.0068	-0.04852 to 0.03492	No	ns	0.936	C-D
0.7909	107.607	0.0651	0.052
1.151	25.697	0.037	0.038		Test details	Mean 1	Mean 2	Mean Diff.	SE of diff.	n1	n2	t	DF
1.048	29.921	0.044	0.044		wild-type vs. nhr-8(hd117)	1.013	64.17	-63.15	13.18	7	7	4.792	6
0.829	29.742	0.037	0.049		tir-1(qd4) vs. tir-1(qd4);nhr-8(hd117)	0.05869	0.06549	-0.0068	0.01312	7	7	0.5184	11.22
