# Supplementary material for: Pathogen infection and cholesterol deficiency activate the C. elegans p38 immune pathway through a TIR-1/SARM1 phase transition
Source: eLife. 2022 Jan 31;11:e74206. doi: 10.7554/eLife.74206 (PMC8923663; doi:10.7554/eLife.74206)
Supplement: Figure 4—source data 4. [file elife-74206-fig4-data4.xlsx]

## Sheet: Sheet1
Figure 4I. qRT-PCR data of irg-4 in the indicated mutant animals grown on standard nematode growth media (+5 μg/mL cholesterol).
wild-type	nhr-8(hd117)	tir-1(qd4)	tir-1(qd4);nhr-8(hd117)		one-way ANOVA
0.7324	13.2165	0.0315	0.0395		Dunnett's T3 multiple comparisons test	Mean Diff.	95.00% CI of diff.	Below threshold?	Summary	Adjusted P Value
1.1374	9.9773	0.0282	0.0398		wild-type vs. nhr-8(hd117)	-17.09	-28.52 to -5.661	Yes	**	0.0037	A-B
1.0687	11.5984	0.0233	0.049		tir-1(qd4) vs. tir-1(qd4);nhr-8(hd117)	0.003357	-0.04262 to 0.04934	No	ns	0.9888	C-D
1.1232	12.7926	0.0256	0.0488
0.989	23.056	0.06	0.043		Test details	Mean 1	Mean 2	Mean Diff.	SE of diff.	n1	n2	t	DF
1.125	26.831	0.109	0.051		wild-type vs. nhr-8(hd117)	1.011	18.1	-17.09	3.028	7	7	5.644	6.004
0.899	29.234	0.069	0.052		tir-1(qd4) vs. tir-1(qd4);nhr-8(hd117)	0.04951	0.04616	0.003357	0.01218	7	7	0.2756	6.331
