# Supplementary material for: Pathogen infection and cholesterol deficiency activate the C. elegans p38 immune pathway through a TIR-1/SARM1 phase transition
Source: eLife. 2022 Jan 31;11:e74206. doi: 10.7554/eLife.74206 (PMC8923663; doi:10.7554/eLife.74206)
Supplement: Figure 4—source data 5. [file elife-74206-fig4-data5.xlsx]

## Sheet: Sheet1
Figure 4J. qRT-PCR data of irg-5 in the indicated mutant animals grown on standard nematode growth media (+5 μg/mL cholesterol).
wild-type	nhr-8(hd117)	tir-1(qd4)	tir-1(qd4);nhr-8(hd117)		one-way ANOVA
0.9502	6.1596	0.022	0.0128		Dunnett's T3 multiple comparisons test	Mean Diff.	95.00% CI of diff.	Below threshold?	Summary	Adjusted P Value
0.8701	6.1001	0.0236	0.0189		wild-type vs. nhr-8(hd117)	-12.31	-24.34 to -0.2849	Yes	*	0.0228	A-B
1.2095	9.5733	0.0189	0.0172		tir-1(qd4) vs. tir-1(qd4);nhr-8(hd117)	0.02343	-0.01873 to 0.06560	No	ns	0.2014	C-D
1.165	14.872	0.072	0.024
1.087	20.585	0.064	0.026		Test details	Mean 1	Mean 2	Mean Diff.	SE of diff.	n1	n2	t	DF
0.79	22.67	0.072	0.033		wild-type vs. nhr-8(hd117)	1.012	13.33	-12.31	2.945	6	6	4.182	5.005
					tir-1(qd4) vs. tir-1(qd4);nhr-8(hd117)	0.04542	0.02198	0.02343	0.01117	6	6	2.098	5.737
