# Supplementary material for: Pathogen infection and cholesterol deficiency activate the C. elegans p38 immune pathway through a TIR-1/SARM1 phase transition
Source: eLife. 2022 Jan 31;11:e74206. doi: 10.7554/eLife.74206 (PMC8923663; doi:10.7554/eLife.74206)
Supplement: Figure 4—source data 6. [file elife-74206-fig4-data6.xlsx]

## Sheet: Sheet1
Figure 4K. qRT-PCR data of K08D8.4 in the indicated mutant animals grown on standard nematode growth media (+5 μg/mL cholesterol).
wild-type	nhr-8(hd117)	tir-1(qd4)	tir-1(qd4);nhr-8(hd117)		one-way ANOVA
1.104	3.011	0.143	0.242		Dunnett's T3 multiple comparisons test	Mean Diff.	95.00% CI of diff.	Below threshold?	Summary	Adjusted P Value
0.932	2.973	0.163	0.251		wild-type vs. nhr-8(hd117)	-2.032	-2.319 to -1.746	Yes	****	<0.0001	A-B
0.972	3.121	0.145	0.333		tir-1(qd4) vs. tir-1(qd4);nhr-8(hd117)	-0.125	-0.3617 to 0.1117	No	ns	0.084	C-D
					Test details	Mean 1	Mean 2	Mean Diff.	SE of diff.	n1	n2	t	DF
					wild-type vs. nhr-8(hd117)	1.003	3.035	-2.032	0.06834	3	3	29.74	3.904
					tir-1(qd4) vs. tir-1(qd4);nhr-8(hd117)	0.1503	0.2753	-0.125	0.02964	3	3	4.217	2.193
