# Supplementary material for: Pathogen infection and cholesterol deficiency activate the C. elegans p38 immune pathway through a TIR-1/SARM1 phase transition
Source: eLife. 2022 Jan 31;11:e74206. doi: 10.7554/eLife.74206 (PMC8923663; doi:10.7554/eLife.74206)
Supplement: Figure 5—source data 1. [file elife-74206-fig5-data1.xlsx]

## Sheet: Sheet1
Figure 5B. Quantification of the number of TIR-1::wrmScarlet puncta present in the last posterior pair of intestinal epithelial cells in the indicated strains and conditions.
wild-type		nhr-8(hd117)		wild-type +0.1% Tergitol		nhr-8(hd117) +0.1% Tergitol		wild-type tir-1(RNAi)		nhr-8(hd117) tir-1(RNAi)
TIR-1::wrmScarlet puncta		TIR-1::wrmScarlet puncta		TIR-1::wrmScarlet puncta		TIR-1::wrmScarlet puncta		TIR-1::wrmScarlet puncta		TIR-1::wrmScarlet puncta		two-way ANOVA
2		17		1		0		1		0		Tukey's multiple comparisons test	Predicted (LS) mean diff.	95.00% CI of diff.	Below threshold?	Summary	Adjusted P Value
1		35		3		1		1		1
1		11		1		1		2		0		wild-type:Control vs. nhr-8(hd117):Control	-7.966	-12.02 to -3.917	Yes	****	<0.0001
1		6		1		0		2		1		nhr-8(hd117):Control vs. nhr-8(hd117):0.1% tergitol	8.075	3.849 to 12.30	Yes	****	<0.0001
3		9		2		1		1		0		nhr-8(hd117):Control vs. nhr-8(hd117):tir-1(RNAi)	8.787	4.065 to 13.51	Yes	****	<0.0001
1		9		2		0		0		0
0		2		4		1		0		1
3		1		1		0		0		0		Test details	Predicted (LS) mean 1	Predicted (LS) mean 2	Predicted (LS) mean diff.	SE of diff.	N1	N2	q	DF
4		3		2		1		0		0
0		2		0		0		0		1		wild-type:Control vs. nhr-8(hd117):Control	1.154	9.12	-7.966	1.396	26	25	8.068	111
0		3		4		0		0		0		nhr-8(hd117):Control vs. nhr-8(hd117):0.1% tergitol	9.12	1.045	8.075	1.457	25	22	7.836	111
2		2		7		0		0		0		nhr-8(hd117):Control vs. nhr-8(hd117):tir-1(RNAi)	9.12	0.3333	8.787	1.628	25	15	7.633	111
0		5		1		4				1
1		4		1		1				0
0		45		4		6				0
0		18		1		0
0		8		0		4
0		10				1
1		6				0
0		6				1
0		6				0
1		4				1
1		7
0		8
1		1
7
