# Supplementary material for: Pathogen infection and cholesterol deficiency activate the C. elegans p38 immune pathway through a TIR-1/SARM1 phase transition
Source: eLife. 2022 Jan 31;11:e74206. doi: 10.7554/eLife.74206 (PMC8923663; doi:10.7554/eLife.74206)
Supplement: Figure 5—source data 2. [file elife-74206-fig5-data2.xlsx]

## Sheet: Sheet1
Figure 5E. qRT-PCR data of T24B8.5 in wild-type and mutant animals of the indicated genotypes grown on standard nematode growth media (+5 μg/mL cholesterol).
Sample	Control RNAi			nhr-8(RNAi)
T24B8.5p::gfp tir-1 wild-type	1.1996	0.822	1.0142	2.4327	2.5444	2.3301
T24B8.5p::gfp tir-1 ΔSAM	0.1161	0.0887	0.11	0.0276	0.0356	0.026
T24B8.5p::gfp tir-1 G747P	0.2027	0.1477	0.1415	0.0964	0.0924	0.1287
T24B8.5p::gfp tir-1 H833A	0.1307	0.1284	0.1253	0.0636	0.0751	0.0783
T24B8.5p::gfp tir-1 E788A	0.131	0.1295	0.1017	0.0483	0.053	0.0451
tir-1(qd4)	0.0689	0.0832	0.0641	0.0254	0.0342	0.0294
nsy-1(ag3)	0.0316	0.0281	0.0387	0.0223	0.0172	0.0233
pmk-1(km25)	0.0112	0.0142	0.0161	0.0176	0.0206	0.0188
two-way ANOVA
Šídák's multiple comparisons test	Mean Diff.	95.00% CI of diff.	Below threshold?	Summary	Adjusted P Value
Control RNAi - nhr-8(RNAi)
T24B8.5p::gfp tir-1 wild-type	-1.424	-1.556 to -1.291	Yes	****	<0.0001
T24B8.5p::gfp tir-1 ΔSAM	0.0752	-0.05723 to 0.2076	No	ns	0.5966
T24B8.5p::gfp tir-1 G747P	0.05813	-0.07430 to 0.1906	No	ns	0.8473
T24B8.5p::gfp tir-1 H833A	0.0558	-0.07663 to 0.1882	No	ns	0.8736
T24B8.5p::gfp tir-1 E788A	0.07193	-0.06050 to 0.2044	No	ns	0.6493
tir-1(qd4)	0.0424	-0.09003 to 0.1748	No	ns	0.9708
nsy-1(ag3)	0.01187	-0.1206 to 0.1443	No	ns	>0.9999
pmk-1(km25)	-0.005167	-0.1376 to 0.1273	No	ns	>0.9999
Test details	Mean 1	Mean 2	Mean Diff.	SE of diff.	N1	N2	t	DF
Control RNAi - nhr-8(RNAi)
T24B8.5p::gfp tir-1 wild-type	1.012	2.436	-1.424	0.04538	3	3	31.38	32
T24B8.5p::gfp tir-1 ΔSAM	0.1049	0.02973	0.0752	0.04538	3	3	1.657	32
T24B8.5p::gfp tir-1 G747P	0.164	0.1058	0.05813	0.04538	3	3	1.281	32
T24B8.5p::gfp tir-1 H833A	0.1281	0.07233	0.0558	0.04538	3	3	1.23	32
T24B8.5p::gfp tir-1 E788A	0.1207	0.0488	0.07193	0.04538	3	3	1.585	32
tir-1(qd4)	0.07207	0.02967	0.0424	0.04538	3	3	0.9343	32
nsy-1(ag3)	0.0328	0.02093	0.01187	0.04538	3	3	0.2615	32
pmk-1(km25)	0.01383	0.019	-0.005167	0.04538	3	3	0.1139	32
