# Supplementary material for: Pathogen infection and cholesterol deficiency activate the C. elegans p38 immune pathway through a TIR-1/SARM1 phase transition
Source: eLife. 2022 Jan 31;11:e74206. doi: 10.7554/eLife.74206 (PMC8923663; doi:10.7554/eLife.74206)
Supplement: Figure 5—source data 3. [file elife-74206-fig5-data3.xlsx]

## Sheet: Sheet1
Figure 5F. qRT-PCR data of irg-4 in wild-type and mutant animals of the indicated genotypes grown on standard nematode growth media (+5 μg/mL cholesterol).
Sample	Control RNAi			nhr-8(RNAi)
T24B8.5p::gfp tir-1 wild-type	1.1951	0.9123	0.9172	3.1929	3.0827	2.6852
T24B8.5p::gfp tir-1 ΔSAM	0.1074	0.1102	0.0844	0.0781	0.0749	0.0725
T24B8.5p::gfp tir-1 G747P	0.1764	0.1267	0.1236	0.1015	0.1075	0.1284
T24B8.5p::gfp tir-1 H833A	0.0971	0.1187	0.1235	0.0976	0.093	0.0945
T24B8.5p::gfp tir-1 E788A	0.0685	0.0954	0.0753	0.1127	0.1142	0.1052
tir-1(qd4)	0.091	0.0953	0.0685	0.099	0.1121	0.0805
nsy-1(ag3)	0.0347	0.0396	0.0461	0.0587	0.0577	0.0549
pmk-1(km25)	0.0174	0.014	0.0182	0.0265	0.027	0.0198
two-way ANOVA
Šídák's multiple comparisons test	Mean Diff.	95.00% CI of diff.	Below threshold?	Summary	Adjusted P Value
Control RNAi - nhr-8(RNAi)
T24B8.5p::gfp tir-1 wild-type	-1.979	-2.167 to -1.791	Yes	****	<0.0001
T24B8.5p::gfp tir-1 ΔSAM	0.0255	-0.1626 to 0.2136	No	ns	>0.9999
T24B8.5p::gfp tir-1 G747P	0.02977	-0.1584 to 0.2179	No	ns	0.9998
T24B8.5p::gfp tir-1 H833A	0.01807	-0.1701 to 0.2062	No	ns	>0.9999
T24B8.5p::gfp tir-1 E788A	-0.03097	-0.2191 to 0.1572	No	ns	0.9997
tir-1(qd4)	-0.01227	-0.2004 to 0.1759	No	ns	>0.9999
nsy-1(ag3)	-0.01697	-0.2051 to 0.1712	No	ns	>0.9999
pmk-1(km25)	-0.0079	-0.1960 to 0.1802	No	ns	>0.9999
Test details	Mean 1	Mean 2	Mean Diff.	SE of diff.	N1	N2	t	DF
Control RNAi - nhr-8(RNAi)
T24B8.5p::gfp tir-1 wild-type	1.008	2.987	-1.979	0.06447	3	3	30.69	32
T24B8.5p::gfp tir-1 ΔSAM	0.1007	0.07517	0.0255	0.06447	3	3	0.3955	32
T24B8.5p::gfp tir-1 G747P	0.1422	0.1125	0.02977	0.06447	3	3	0.4617	32
T24B8.5p::gfp tir-1 H833A	0.1131	0.09503	0.01807	0.06447	3	3	0.2802	32
T24B8.5p::gfp tir-1 E788A	0.07973	0.1107	-0.03097	0.06447	3	3	0.4803	32
tir-1(qd4)	0.08493	0.0972	-0.01227	0.06447	3	3	0.1903	32
nsy-1(ag3)	0.04013	0.0571	-0.01697	0.06447	3	3	0.2632	32
pmk-1(km25)	0.01653	0.02443	-0.0079	0.06447	3	3	0.1225	32
