# Supplementary material for: Pathogen infection and cholesterol deficiency activate the C. elegans p38 immune pathway through a TIR-1/SARM1 phase transition
Source: eLife. 2022 Jan 31;11:e74206. doi: 10.7554/eLife.74206 (PMC8923663; doi:10.7554/eLife.74206)
Supplement: Figure 6—source data 1. [file elife-74206-fig6-data1.xlsx]

## Sheet: Sheet1
Figure 6H. mRNA-seq data for T24B8.5 from the conditions indicated showing scaled reads per base.
								Statistical analysis performed by Sleuth as described in Material and Methods section
	uninfected			P. aeruginosa				Comparison	q-value
wild-type	148.171	203.958	146.099	1074.43	1018.92	1123		wild-type P. aeruginosa infected vs. nhr-8(hd117) P. aeruginosa infected	2.57632e-05
nhr-8(hd117)	3747.74	3954.32	3701.62	2932.58	3585.11	3651.54		nhr-8(hd117) uninfected vs. nhr-8(hd117) P. aeruginosa infected	0.103423
