# Supplementary material for: Pathogen infection and cholesterol deficiency activate the C. elegans p38 immune pathway through a TIR-1/SARM1 phase transition
Source: eLife. 2022 Jan 31;11:e74206. doi: 10.7554/eLife.74206 (PMC8923663; doi:10.7554/eLife.74206)
Supplement: Figure 6—source data 2. [file elife-74206-fig6-data2.xlsx]

## Sheet: Sheet1
Figure 6I. mRNA-seq data for irg-4 from the conditions indicated showing scaled reads per base.
								Statistical analysis performed by Sleuth as described in Material and Methods section
	uninfected			P. aeruginosa				Comparison	q-value
wild-type	170.508	190.833	181.297	2415.92	2377.99	2775.99		wild-type P. aeruginosa infected vs. nhr-8(hd117) P. aeruginosa infected	8.30261e-06
nhr-8(hd117)	7497.2	6716.6	6090.15	13011.3	15899.9	14640.2		nhr-8(hd117) uninfected vs. nhr-8(hd117) P. aeruginosa infected	0.000517045
