# Supplementary material for: Pathogen infection and cholesterol deficiency activate the C. elegans p38 immune pathway through a TIR-1/SARM1 phase transition
Source: eLife. 2022 Jan 31;11:e74206. doi: 10.7554/eLife.74206 (PMC8923663; doi:10.7554/eLife.74206)
Supplement: Figure 6—source data 3. [file elife-74206-fig6-data3.xlsx]

## Sheet: Sheet1
Figure 6J. mRNA-seq data for irg-5 from the conditions indicated showing scaled reads per base.
								Statistical analysis performed by Sleuth as described in Material and Methods section
	uninfected			P. aeruginosa				Comparison	q-value
wild-type	189.378	177.172	215.046	9547.56	8252.35	10699.7		wild-type P. aeruginosa infected vs. nhr-8(hd117) P. aeruginosa infected	9.35283e-05
nhr-8(hd117)	4442.64	4328.61	4239.61	23290.7	27830.9	24138.3		nhr-8(hd117) uninfected vs. nhr-8(hd117) P. aeruginosa infected	1.52583e-05
