# Supplementary material for: Pathogen infection and cholesterol deficiency activate the C. elegans p38 immune pathway through a TIR-1/SARM1 phase transition
Source: eLife. 2022 Jan 31;11:e74206. doi: 10.7554/eLife.74206 (PMC8923663; doi:10.7554/eLife.74206)
Supplement: Figure 6—source data 4. [file elife-74206-fig6-data4.xlsx]

## Sheet: Sheet1
Figure 6K. mRNA-seq data for K08D8.4 from the conditions indicated showing scaled reads per base.
								Statistical analysis performed by Sleuth as described in Material and Methods section
	uninfected			P. aeruginosa				Comparison	q-value
wild-type	225.684	286.784	291.819	1163.35	1218.8	1194.25		wild-type P. aeruginosa infected vs. nhr-8(hd117) P. aeruginosa infected	1.28303e-05
nhr-8(hd117)	1368.96	1382.66	1383.42	2749.65	2767.73	2759.64		nhr-8(hd117) uninfected vs. nhr-8(hd117) P. aeruginosa infected	2.67241e-05
