# Supplementary material for: Pathogen infection and cholesterol deficiency activate the C. elegans p38 immune pathway through a TIR-1/SARM1 phase transition
Source: eLife. 2022 Jan 31;11:e74206. doi: 10.7554/eLife.74206 (PMC8923663; doi:10.7554/eLife.74206)
Supplement: Supplementary file 1. [file elife-74206-supp1.xlsx]

## Sheet: nhr-8(hd117)
Wormbase ID	qval	log2(nhr-8(hd117)/ wild-type uninfected)
WBGene00007872	0.000143127	9.2156
WBGene00017199	7.49572e-06	8.92012
WBGene00007873	2.83123e-06	8.53389
WBGene00009710	9.72934e-06	8.1715
WBGene00021580	1.88473e-06	7.73893
WBGene00008097	1.76967e-05	7.49292
WBGene00000613	7.80696e-05	7.35867
WBGene00019471	0.000307205	7.16552
WBGene00008631	3.08114e-06	6.97741
WBGene00013900	0.000974303	6.42468
WBGene00010062	1.88473e-06	6.25857
WBGene00006627	5.4299e-06	6.14819
WBGene00008477	4.78889e-06	6.02088
WBGene00006628	2.4368e-06	5.97521
WBGene00021805	4.66351e-05	5.85456
WBGene00008632	0.000335951	5.85303
WBGene00009907	4.08516e-05	5.83029
WBGene00014132	1.88473e-06	5.76146
WBGene00021581	5.77775e-05	5.75867
WBGene00009608	8.01191e-05	5.70349
WBGene00005548	0.000273998	5.69908
WBGene00006534	6.00038e-05	5.60698
WBGene00045457	1.88473e-06	5.60372
WBGene00001158	2.93394e-05	5.60026
WBGene00000731	0.000457997	5.467
WBGene00008891	4.77514e-06	5.43532
WBGene00012682	8.6598e-05	5.41542
WBGene00012081	1.65477e-05	5.35907
WBGene00016785	0.000120203	5.34533
WBGene00014009	9.23761e-06	5.28028
WBGene00011672	1.88473e-06	5.25107
WBGene00008584	8.07391e-07	5.22563
WBGene00000618	0.000256945	5.21639
WBGene00044658	0.000252338	5.18204
WBGene00012025	2.04524e-05	5.1437
WBGene00007232	0.000137524	5.08902
WBGene00001762	5.35458e-05	4.99834
WBGene00009756	7.94476e-05	4.99406
WBGene00011844	1.85267e-06	4.98014
WBGene00012501	8.8774e-05	4.96201
WBGene00009905	8.53836e-05	4.92831
WBGene00019421	0.000114591	4.91019
WBGene00012467	5.78379e-05	4.90383
WBGene00015593	0.00011391	4.87208
WBGene00022891	2.02055e-06	4.85505
WBGene00009914	7.55497e-06	4.85501
WBGene00012027	3.11813e-05	4.85121
WBGene00020691	0.000118294	4.82267
WBGene00001734	0.00527873	4.81348
WBGene00008640	1.45843e-05	4.78894
WBGene00044043	0.00017285	4.68999
WBGene00000783	8.07391e-07	4.63646
WBGene00022816	2.02055e-06	4.5915
WBGene00006429	7.11377e-05	4.58723
WBGene00007231	0.000942487	4.56753
WBGene00019660	8.07391e-07	4.55423
WBGene00009778	3.47907e-05	4.55206
WBGene00000979	3.27924e-05	4.53196
WBGene00011979	2.59925e-06	4.51655
WBGene00000688	0.000516475	4.50212
WBGene00019472	7.31143e-06	4.48362
WBGene00009429	8.3025e-07	4.48355
WBGene00000399	2.07874e-06	4.46935
WBGene00044280	1.70973e-05	4.45685
WBGene00021583	1.88473e-06	4.45453
WBGene00021517	8.0689e-06	4.45323
WBGene00001063	6.01065e-05	4.43471
WBGene00010157	0.000998627	4.43096
WBGene00012028	9.03117e-05	4.43032
WBGene00000737	0.00102809	4.41826
WBGene00018295	0.00260552	4.35382
WBGene00017154	1.71788e-05	4.34185
WBGene00021865	0.00150064	4.33254
WBGene00015605	5.51004e-06	4.32249
WBGene00013493	0.00173649	4.27315
WBGene00008850	2.5352e-06	4.27065
WBGene00002118	0.00100929	4.26221
WBGene00005551	0.000125851	4.2539
WBGene00000402	2.81683e-06	4.18117
WBGene00016686	0.000311748	4.17316
WBGene00010125	8.07391e-07	4.16555
WBGene00011321	1.83117e-05	4.12396
WBGene00009835	1.28113e-05	4.12124
WBGene00012026	0.000313058	4.11358
WBGene00012256	6.39174e-06	4.10715
WBGene00019212	4.41777e-06	4.101
WBGene00012648	3.11714e-06	4.05578
WBGene00000749	2.10501e-05	4.05566
WBGene00185116	0.00108118	4.0518
WBGene00007479	1.88473e-06	4.04954
WBGene00189995	0.000110619	4.04304
WBGene00044381	0.000114413	4.04288
WBGene00044458	0.00204067	4.02823
WBGene00012261	4.66174e-06	4.02798
WBGene00016422	3.54236e-06	4.02417
WBGene00015932	2.09995e-06	4.0152
WBGene00008807	3.42154e-05	4.00891
WBGene00009094	2.83123e-06	3.95111
WBGene00020465	0.000374175	3.94391
WBGene00001069	2.77358e-06	3.93372
WBGene00008292	0.0024339	3.93152
WBGene00021587	9.80543e-05	3.92925
WBGene00000702	1.24487e-05	3.92123
WBGene00000624	0.000352022	3.9111
WBGene00235110	0.00161995	3.90644
WBGene00019348	2.13604e-05	3.90612
WBGene00009849	0.000319637	3.88792
WBGene00018971	1.91141e-06	3.86834
WBGene00017225	0.000890472	3.86103
WBGene00012186	3.30799e-06	3.85065
WBGene00000623	3.26991e-05	3.84487
WBGene00302993	2.60825e-05	3.84332
WBGene00016502	0.000320118	3.83915
WBGene00010893	0.000413393	3.83318
WBGene00011107	1.58546e-06	3.82994
WBGene00001071	1.88473e-06	3.82908
WBGene00006956	1.79672e-05	3.81021
WBGene00008301	0.000107175	3.79511
WBGene00010835	1.61506e-05	3.7948
WBGene00012257	1.37146e-05	3.79132
WBGene00022024	1.52561e-05	3.78589
WBGene00012255	1.90126e-05	3.75371
WBGene00001107	0.000179385	3.74188
WBGene00018601	0.00019822	3.74188
WBGene00009108	0.00278462	3.74077
WBGene00001065	1.18944e-05	3.73854
WBGene00016369	0.000474014	3.72149
WBGene00001070	6.72012e-06	3.71995
WBGene00001072	1.88473e-06	3.71483
WBGene00015879	3.64574e-05	3.71305
WBGene00001068	8.1785e-06	3.70544
WBGene00015720	0.00204762	3.70269
WBGene00008633	0.00386465	3.70032
WBGene00007440	3.92492e-06	3.69464
WBGene00044382	0.000240493	3.69448
WBGene00011952	4.66351e-05	3.68996
WBGene00020242	7.61371e-05	3.68292
WBGene00015795	8.0689e-06	3.66156
WBGene00022274	2.09995e-06	3.65553
WBGene00015911	0.00023984	3.63918
WBGene00011161	0.000294402	3.62883
WBGene00004224	8.35229e-06	3.62565
WBGene00020083	2.87398e-05	3.61534
WBGene00003663	0.000524131	3.61308
WBGene00009423	0.00926058	3.60868
WBGene00018997	0.000712284	3.60625
WBGene00005659	0.00137306	3.6057
WBGene00050939	4.26766e-05	3.6022
WBGene00008602	1.88473e-06	3.60129
WBGene00020550	8.46434e-06	3.59898
WBGene00219208	6.82928e-05	3.59296
WBGene00010033	0.000305066	3.58607
WBGene00020760	5.51004e-06	3.57966
WBGene00019404	4.00572e-05	3.57294
WBGene00012046	0.000120213	3.56396
WBGene00011673	0.000889766	3.53942
WBGene00003092	4.71573e-06	3.53748
WBGene00022103	2.48599e-05	3.53574
WBGene00009303	0.000368668	3.52789
WBGene00015019	0.00018405	3.52254
WBGene00002282	1.93095e-06	3.5206
WBGene00005550	0.000292454	3.51322
WBGene00005657	2.37531e-05	3.51237
WBGene00020700	0.000154154	3.51047
WBGene00012540	8.82848e-05	3.50934
WBGene00009926	2.77358e-06	3.5058
WBGene00014173	1.87633e-05	3.50227
WBGene00011674	0.000973406	3.50084
WBGene00007938	4.01721e-06	3.4938
WBGene00050875	2.3849e-05	3.49013
WBGene00012649	0.0004151	3.48853
WBGene00021494	0.00629916	3.4845
WBGene00023483	0.000973648	3.48145
WBGene00019520	5.51004e-06	3.47695
WBGene00022033	2.72279e-05	3.47692
WBGene00009345	0.00083778	3.47384
WBGene00001064	3.00236e-06	3.46525
WBGene00019148	1.33544e-05	3.46124
WBGene00016773	5.35458e-05	3.45997
WBGene00014189	0.000257972	3.45574
WBGene00017960	0.00218678	3.45329
WBGene00011744	9.54757e-05	3.45182
WBGene00195003	0.000729922	3.44902
WBGene00018630	1.11305e-05	3.44882
WBGene00009311	5.25581e-06	3.43421
WBGene00000631	2.2594e-05	3.42513
WBGene00012032	1.88945e-06	3.42324
WBGene00012271	0.000149871	3.42248
WBGene00020881	0.00035312	3.41793
WBGene00013637	0.00331207	3.41643
WBGene00304201	0.000729056	3.41087
WBGene00009371	1.95103e-05	3.41075
WBGene00005586	0.00039996	3.40603
WBGene00005969	0.000377702	3.40603
WBGene00001432	2.88236e-05	3.404
WBGene00012791	6.47954e-06	3.39537
WBGene00020080	0.000206556	3.3941
WBGene00019901	1.60905e-05	3.38745
WBGene00019855	2.75767e-06	3.38282
WBGene00194916	0.00242511	3.37782
WBGene00000015	0.000119464	3.37475
WBGene00003702	1.26963e-05	3.37317
WBGene00206354	2.28957e-05	3.37061
WBGene00012959	3.63944e-05	3.36357
WBGene00013846	4.51831e-06	3.34927
WBGene00006366	4.25988e-06	3.34325
WBGene00018039	0.000109727	3.34143
WBGene00015781	2.74412e-06	3.34038
WBGene00006948	1.22474e-05	3.33139
WBGene00021963	1.97631e-05	3.32927
WBGene00007361	0.000521697	3.32731
WBGene00011025	0.000707303	3.31695
WBGene00012635	8.11872e-05	3.31599
WBGene00004219	4.84127e-06	3.31543
WBGene00006544	0.000189793	3.30852
WBGene00008905	0.000319181	3.30716
WBGene00138721	3.33366e-05	3.30466
WBGene00018414	0.000945568	3.30368
WBGene00303081	6.80995e-06	3.30186
WBGene00302974	3.11714e-06	3.29555
WBGene00044183	0.00362829	3.29287
WBGene00012939	6.99918e-06	3.28778
WBGene00007992	0.00380858	3.28646
WBGene00017937	4.31942e-06	3.28013
WBGene00007177	6.65884e-06	3.26929
WBGene00003968	7.55497e-06	3.26698
WBGene00016052	0.0004592	3.2666
WBGene00008712	0.000137142	3.26619
WBGene00018547	7.55497e-06	3.26617
WBGene00016136	7.55381e-05	3.26606
WBGene00007833	8.07391e-07	3.26402
WBGene00017469	0.00167741	3.26292
WBGene00011548	1.28323e-05	3.26014
WBGene00010285	1.4172e-05	3.25211
WBGene00044352	0.00040112	3.24431
WBGene00020329	9.22977e-05	3.23818
WBGene00014183	1.54625e-06	3.23769
WBGene00016329	4.71573e-06	3.23408
WBGene00018624	0.000448325	3.23283
WBGene00011894	0.000124316	3.2325
WBGene00008486	1.93095e-06	3.2321
WBGene00012518	9.93551e-05	3.22945
WBGene00007530	2.81683e-06	3.22874
WBGene00021582	1.29192e-05	3.22857
WBGene00011698	0.00277357	3.22778
WBGene00019235	0.0012101	3.22317
WBGene00008988	3.19542e-06	3.2214
WBGene00235268	3.31421e-06	3.21736
WBGene00000272	0.00793992	3.21618
WBGene00000522	8.07391e-07	3.21226
WBGene00016180	2.09995e-06	3.21024
WBGene00007097	1.39211e-06	3.20356
WBGene00000521	0.000864112	3.20137
WBGene00013646	0.000582752	3.19635
WBGene00017018	4.36235e-05	3.19563
WBGene00006947	8.0477e-06	3.19349
WBGene00008490	0.00129933	3.18546
WBGene00018102	0.00104897	3.17718
WBGene00000928	3.21408e-05	3.17061
WBGene00020532	0.000355056	3.16727
WBGene00018215	2.74412e-06	3.16051
WBGene00005653	0.00091792	3.1593
WBGene00008964	1.63399e-05	3.15832
WBGene00008698	0.00154061	3.15483
WBGene00008290	0.000165473	3.15252
WBGene00015496	0.000137524	3.15104
WBGene00000372	0.00163934	3.14642
WBGene00010673	2.59925e-06	3.14489
WBGene00003664	5.3138e-06	3.14466
WBGene00000620	0.00149051	3.14455
WBGene00008875	1.6366e-05	3.14243
WBGene00010423	0.00169679	3.14133
WBGene00011175	2.91418e-05	3.14061
WBGene00009805	5.90276e-05	3.14055
WBGene00044618	1.76932e-05	3.1332
WBGene00010108	0.000621771	3.13239
WBGene00138725	0.00273758	3.12904
WBGene00019908	5.66122e-05	3.12719
WBGene00008180	7.83126e-05	3.12668
WBGene00022611	7.44622e-06	3.1228
WBGene00021518	8.3025e-07	3.11494
WBGene00009908	0.000744021	3.11167
WBGene00008605	2.11615e-06	3.10646
WBGene00018535	0.000141536	3.10521
WBGene00011018	0.00144065	3.10508
WBGene00009261	3.54236e-06	3.10497
WBGene00018034	0.000965351	3.10109
WBGene00012628	1.21387e-05	3.09918
WBGene00004264	2.02055e-06	3.09856
WBGene00007875	1.39211e-06	3.09793
WBGene00007560	2.49156e-05	3.09294
WBGene00016000	0.00110944	3.09209
WBGene00044623	1.97167e-06	3.07866
WBGene00044292	0.000778537	3.07657
WBGene00044548	0.000720202	3.07501
WBGene00015721	0.00101425	3.07332
WBGene00009438	7.96402e-05	3.06829
WBGene00005661	0.00121262	3.06111
WBGene00019272	5.22089e-06	3.05974
WBGene00019154	5.51004e-06	3.05918
WBGene00000557	5.38257e-05	3.05682
WBGene00008681	1.88473e-06	3.05426
WBGene00011024	0.00098795	3.05377
WBGene00003888	3.55584e-05	3.05007
WBGene00019285	9.71904e-06	3.0475
WBGene00017716	3.78141e-06	3.04627
WBGene00014184	3.33997e-05	3.04286
WBGene00003703	7.52655e-05	3.0421
WBGene00195144	0.00187499	3.04094
WBGene00016467	0.00577241	3.04002
WBGene00022591	1.37917e-05	3.03839
WBGene00001691	2.33552e-06	3.03478
WBGene00013849	1.33544e-05	3.03462
WBGene00002827	8.1785e-06	3.03445
WBGene00001690	1.88473e-06	3.03232
WBGene00010124	1.39211e-06	3.0315
WBGene00014136	1.53538e-06	3.03074
WBGene00006163	0.00231234	3.02322
WBGene00017535	2.19887e-05	3.02319
WBGene00018741	0.000120533	3.02291
WBGene00007407	0.0040316	3.02176
WBGene00001547	1.92954e-05	3.0188
WBGene00045416	0.00024473	3.01774
WBGene00007829	0.00147291	3.01538
WBGene00013130	0.000512668	3.01524
WBGene00010968	3.66909e-05	3.01489
WBGene00020702	3.64347e-05	3.01446
WBGene00018965	2.98025e-06	3.00703
WBGene00018844	0.00164603	3.00469
WBGene00007141	0.000165339	3.00284
WBGene00195051	6.79972e-05	3.00215
WBGene00003473	0.000128021	3.00105
WBGene00014182	8.30146e-06	3.00054
WBGene00014188	8.30146e-06	3.00054
WBGene00022616	0.00158653	2.99927
WBGene00010127	0.000202548	2.99493
WBGene00021176	0.00165873	2.99355
WBGene00021389	1.88317e-05	2.9909
WBGene00220261	7.13167e-05	2.98592
WBGene00016921	2.41274e-05	2.98463
WBGene00001724	4.74655e-06	2.98056
WBGene00006666	1.06389e-05	2.97827
WBGene00012163	0.000125851	2.97695
WBGene00044212	0.00943072	2.96988
WBGene00007174	3.92492e-06	2.96858
WBGene00255469	0.000925545	2.96572
WBGene00013585	9.45201e-06	2.96391
WBGene00017577	6.39174e-06	2.9595
WBGene00013891	3.00878e-06	2.95525
WBGene00020590	0.000153206	2.95478
WBGene00012023	0.00128934	2.95472
WBGene00013901	8.84715e-06	2.95026
WBGene00008577	1.67535e-05	2.93197
WBGene00018418	2.88625e-06	2.93158
WBGene00008762	6.99918e-06	2.93108
WBGene00022577	5.15863e-05	2.92933
WBGene00008621	3.66578e-05	2.9292
WBGene00009281	0.00584045	2.92559
WBGene00018133	9.53882e-05	2.92554
WBGene00018040	6.31595e-05	2.9186
WBGene00017819	0.000683157	2.91669
WBGene00008150	4.71573e-06	2.91413
WBGene00284849	0.000480944	2.91386
WBGene00001059	1.88473e-06	2.91147
WBGene00020250	0.000204936	2.90771
WBGene00000014	0.00114038	2.90707
WBGene00008093	0.000294655	2.90133
WBGene00044530	8.0477e-06	2.89606
WBGene00020239	0.000871653	2.89407
WBGene00011384	0.00197808	2.89339
WBGene00020704	2.38378e-05	2.89299
WBGene00020365	1.22474e-05	2.89168
WBGene00015300	1.3103e-05	2.89155
WBGene00017991	4.01721e-06	2.89078
WBGene00019661	3.42154e-05	2.88705
WBGene00001770	2.14341e-06	2.88303
WBGene00021529	4.2339e-05	2.88264
WBGene00000251	2.59925e-06	2.88163
WBGene00022504	4.41777e-06	2.87916
WBGene00018640	2.07874e-06	2.8785
WBGene00044631	0.000147796	2.87048
WBGene00044723	2.84596e-05	2.86723
WBGene00009133	3.56417e-06	2.86477
WBGene00022415	1.35967e-05	2.86391
WBGene00015259	0.000101714	2.86159
WBGene00020194	3.10556e-05	2.85579
WBGene00004233	2.81203e-05	2.85228
WBGene00017212	0.000120714	2.85065
WBGene00021931	4.52449e-06	2.84916
WBGene00016805	1.3627e-05	2.84556
WBGene00017764	6.80417e-06	2.84451
WBGene00017190	0.00175711	2.84386
WBGene00008277	1.67029e-05	2.84378
WBGene00017998	1.39211e-06	2.84089
WBGene00021519	9.71301e-05	2.8325
WBGene00004397	9.56197e-06	2.83123
WBGene00010205	0.000240541	2.83048
WBGene00011515	0.00146068	2.82941
WBGene00010573	2.51141e-06	2.82602
WBGene00009791	6.12404e-05	2.8242
WBGene00006464	8.06067e-06	2.8239
WBGene00018755	7.55497e-06	2.81997
WBGene00011665	3.73434e-05	2.81984
WBGene00013820	0.00323884	2.81858
WBGene00008906	0.00224031	2.81811
WBGene00000397	2.4368e-06	2.81284
WBGene00010738	1.88473e-06	2.81066
WBGene00020325	4.91242e-05	2.80195
WBGene00016671	5.51177e-05	2.80016
WBGene00012199	4.74655e-06	2.79987
WBGene00006097	0.000285798	2.79624
WBGene00002393	4.91626e-05	2.79621
WBGene00017524	0.000865053	2.79475
WBGene00011882	0.00157176	2.78957
WBGene00012917	2.12994e-06	2.78952
WBGene00011801	8.3637e-06	2.78888
WBGene00020648	0.000235705	2.78829
WBGene00016022	7.55497e-06	2.78591
WBGene00044571	0.00326594	2.78536
WBGene00018289	0.00088376	2.7837
WBGene00016247	1.37146e-05	2.7832
WBGene00009279	0.000725308	2.78207
WBGene00015841	3.96971e-05	2.78039
WBGene00012961	2.59925e-06	2.7775
WBGene00019021	6.00038e-05	2.77702
WBGene00018211	2.89609e-05	2.77682
WBGene00086560	0.00313109	2.76798
WBGene00015646	8.07391e-07	2.76671
WBGene00015523	0.000521199	2.76618
WBGene00045379	0.000137533	2.76484
WBGene00019564	9.25689e-05	2.76372
WBGene00019549	0.00148463	2.76088
WBGene00009724	1.65079e-05	2.75874
WBGene00045401	0.00166606	2.75658
WBGene00017307	5.0473e-06	2.75339
WBGene00017666	0.000144267	2.75316
WBGene00017226	3.11289e-05	2.75215
WBGene00008507	0.0022019	2.75183
WBGene00008630	0.00186951	2.75176
WBGene00020483	0.000448325	2.74701
WBGene00004231	1.86628e-05	2.73977
WBGene00022845	8.05733e-05	2.73923
WBGene00019744	8.61087e-06	2.73873
WBGene00004120	1.88473e-06	2.73691
WBGene00004229	1.14837e-05	2.7366
WBGene00015298	4.64518e-06	2.73467
WBGene00007163	0.00345067	2.73443
WBGene00269425	0.00349407	2.73348
WBGene00003534	1.18364e-05	2.73337
WBGene00043297	0.00101828	2.73284
WBGene00010102	0.00560585	2.73111
WBGene00008199	3.00878e-06	2.73097
WBGene00015622	8.35832e-05	2.7301
WBGene00021796	3.11714e-06	2.72531
WBGene00019524	0.00194979	2.71697
WBGene00010442	1.90141e-05	2.71653
WBGene00044024	0.000305765	2.71491
WBGene00004176	0.00284576	2.71365
WBGene00044697	0.000537309	2.71209
WBGene00016845	4.88223e-06	2.706
WBGene00011950	0.00586138	2.70384
WBGene00007552	5.13962e-06	2.70367
WBGene00000252	2.24949e-06	2.70355
WBGene00255420	0.00294343	2.70351
WBGene00013264	0.000551843	2.70342
WBGene00017416	1.18963e-05	2.70335
WBGene00023501	0.00167923	2.70285
WBGene00005703	0.0072503	2.70244
WBGene00009318	7.55645e-05	2.69962
WBGene00000679	0.000466565	2.69863
WBGene00001891	0.00865354	2.6981
WBGene00000665	0.000209284	2.69671
WBGene00020241	0.00343382	2.69477
WBGene00005085	0.0016922	2.6937
WBGene00017200	0.00344295	2.69209
WBGene00018256	1.75723e-05	2.69152
WBGene00001716	3.94938e-06	2.69148
WBGene00012921	7.15688e-05	2.68928
WBGene00012346	8.3242e-05	2.68749
WBGene00001714	6.47954e-06	2.68502
WBGene00011517	3.6491e-06	2.683
WBGene00003057	1.3434e-05	2.68137
WBGene00000039	2.02055e-06	2.67711
WBGene00004398	1.33018e-05	2.67556
WBGene00012433	1.93095e-06	2.67131
WBGene00007414	1.88473e-06	2.66629
WBGene00001723	4.79828e-05	2.66517
WBGene00000395	1.57288e-05	2.66396
WBGene00007994	0.000512995	2.66333
WBGene00004232	2.81683e-06	2.66331
WBGene00019818	2.92411e-05	2.65568
WBGene00007806	0.000119641	2.65534
WBGene00022517	2.25065e-05	2.65528
WBGene00019306	0.0025213	2.65449
WBGene00195179	0.00557228	2.65407
WBGene00015620	9.47906e-05	2.65206
WBGene00015725	0.00350293	2.6509
WBGene00012448	0.00363722	2.65031
WBGene00195214	0.00267276	2.64816
WBGene00004133	1.54625e-06	2.64336
WBGene00044181	0.00142115	2.63801
WBGene00022612	5.67814e-05	2.63476
WBGene00008763	8.98726e-05	2.63467
WBGene00021862	0.00028792	2.62975
WBGene00019318	1.47787e-05	2.62868
WBGene00138711	1.64284e-05	2.62816
WBGene00021436	9.51693e-05	2.62465
WBGene00009343	0.00671689	2.62398
WBGene00009395	9.7014e-05	2.62384
WBGene00018737	1.88473e-06	2.61968
WBGene00044661	3.73434e-05	2.61876
WBGene00021976	0.00222736	2.61481
WBGene00019866	0.00214979	2.61325
WBGene00001700	0.000912263	2.60842
WBGene00077490	0.000136318	2.60629
WBGene00010321	5.20856e-06	2.60464
WBGene00021504	0.00338156	2.60321
WBGene00005017	2.02055e-06	2.60208
WBGene00000684	4.74674e-06	2.59786
WBGene00022287	3.30799e-06	2.59684
WBGene00008448	1.46243e-05	2.59612
WBGene00021178	1.33489e-05	2.59322
WBGene00020699	0.000849304	2.59293
WBGene00001591	3.54236e-06	2.59164
WBGene00015135	5.34787e-05	2.58943
WBGene00008509	2.29845e-05	2.58719
WBGene00004998	1.69011e-05	2.58351
WBGene00011508	0.00384044	2.58339
WBGene00013852	2.57921e-06	2.58119
WBGene00007264	1.22784e-05	2.58038
WBGene00044617	0.000170388	2.57909
WBGene00020587	3.88283e-05	2.57909
WBGene00001079	8.79756e-06	2.57876
WBGene00016064	1.18364e-05	2.57802
WBGene00020863	0.00213433	2.5747
WBGene00008105	0.000927235	2.57206
WBGene00020014	4.87343e-05	2.57122
WBGene00017755	0.00309592	2.56939
WBGene00000606	1.28252e-05	2.56668
WBGene00010528	0.00363722	2.56617
WBGene00001506	9.45944e-06	2.56284
WBGene00011539	0.00197658	2.56162
WBGene00017814	4.49781e-06	2.56154
WBGene00003525	1.20514e-05	2.55973
WBGene00022236	0.000249984	2.55911
WBGene00003533	5.36354e-06	2.55689
WBGene00045269	2.79943e-05	2.55526
WBGene00009806	4.60355e-05	2.55486
WBGene00007420	1.80345e-05	2.55268
WBGene00018057	0.00292896	2.5525
WBGene00022627	1.20674e-05	2.5519
WBGene00010714	6.78152e-06	2.55167
WBGene00006187	0.00402926	2.55062
WBGene00007425	1.24544e-05	2.54731
WBGene00004134	1.54625e-06	2.54674
WBGene00011831	7.19478e-06	2.54426
WBGene00017060	1.28182e-05	2.54421
WBGene00012863	0.000602887	2.54186
WBGene00022160	9.41043e-06	2.53883
WBGene00011800	3.06212e-05	2.53882
WBGene00005016	1.59336e-05	2.53815
WBGene00000633	0.00605925	2.53719
WBGene00011278	8.05705e-06	2.53202
WBGene00007325	1.30945e-05	2.53137
WBGene00021339	3.32662e-05	2.53043
WBGene00009889	6.86519e-06	2.53001
WBGene00013898	7.39343e-06	2.52901
WBGene00017594	7.74361e-06	2.52878
WBGene00013173	5.3138e-06	2.52794
WBGene00001892	0.000481545	2.52059
WBGene00019486	0.000216575	2.52003
WBGene00001820	2.29258e-05	2.51928
WBGene00021850	1.62579e-05	2.51827
WBGene00002274	4.30798e-06	2.51732
WBGene00011077	8.68633e-05	2.51325
WBGene00013965	2.77329e-05	2.5088
WBGene00004210	6.47954e-06	2.50834
WBGene00008376	2.09661e-05	2.50702
WBGene00012429	7.55497e-06	2.50654
WBGene00008511	6.98002e-05	2.50642
WBGene00000902	4.6448e-05	2.50353
WBGene00011393	1.88473e-06	2.50256
WBGene00018738	0.000222516	2.50148
WBGene00017794	0.000141698	2.50131
WBGene00009891	0.00307806	2.50071
WBGene00007800	0.00195787	2.49705
WBGene00020281	2.10773e-05	2.49472
WBGene00020855	1.05228e-05	2.49323
WBGene00010345	8.84715e-06	2.4879
WBGene00004127	2.12994e-06	2.48732
WBGene00007869	7.71445e-05	2.48685
WBGene00005269	0.00442744	2.48359
WBGene00021121	0.000493156	2.48168
WBGene00016319	8.52453e-06	2.48067
WBGene00005003	9.21675e-06	2.47948
WBGene00020846	2.81683e-06	2.47756
WBGene00018299	0.000274827	2.47495
WBGene00017228	0.00429408	2.47231
WBGene00004223	0.00398302	2.47009
WBGene00022283	5.19112e-06	2.46899
WBGene00011385	0.0031029	2.46894
WBGene00017151	2.54121e-05	2.46875
WBGene00022142	7.71445e-05	2.46432
WBGene00013294	0.00320626	2.46323
WBGene00000853	0.00105641	2.46296
WBGene00000705	8.61148e-05	2.46186
WBGene00001500	8.82453e-05	2.46066
WBGene00021496	0.000566626	2.46054
WBGene00044059	0.00349503	2.45554
WBGene00020141	0.00233078	2.45394
WBGene00018803	8.02019e-05	2.45341
WBGene00007868	5.76031e-05	2.44971
WBGene00005018	1.63399e-05	2.44746
WBGene00001711	0.00027908	2.44544
WBGene00018646	0.000340459	2.44145
WBGene00011078	0.000171439	2.44066
WBGene00016386	0.00135158	2.43754
WBGene00008963	2.21837e-05	2.43747
WBGene00019668	0.00416228	2.43526
WBGene00008680	0.00886714	2.43325
WBGene00011624	0.000142921	2.43277
WBGene00021326	3.92492e-06	2.4304
WBGene00021590	6.99918e-06	2.42992
WBGene00206512	0.00412775	2.42414
WBGene00009229	0.000335331	2.42322
WBGene00009964	8.84715e-06	2.42255
WBGene00000893	4.88223e-06	2.41944
WBGene00013171	1.76967e-05	2.41596
WBGene00018571	0.00111737	2.41588
WBGene00019640	0.000171292	2.41534
WBGene00009653	4.51831e-06	2.41183
WBGene00015910	0.000398919	2.41013
WBGene00000493	1.10867e-05	2.40706
WBGene00016132	0.000257257	2.40681
WBGene00001893	0.000652448	2.40493
WBGene00001895	0.000652448	2.40493
WBGene00001925	0.000652448	2.40493
WBGene00001927	0.000652448	2.40493
WBGene00044796	0.000155238	2.40458
WBGene00002983	1.88473e-06	2.40116
WBGene00013609	0.000280599	2.40096
WBGene00006620	1.29192e-05	2.40053
WBGene00044630	1.83881e-05	2.40016
WBGene00008727	4.66711e-05	2.39817
WBGene00008615	0.000287462	2.39778
WBGene00011572	0.00110968	2.39756
WBGene00017420	0.000111091	2.39491
WBGene00015631	7.86839e-05	2.39368
WBGene00018573	1.60174e-05	2.3909
WBGene00044163	8.93011e-06	2.38996
WBGene00006952	7.55497e-06	2.38989
WBGene00044349	0.000876437	2.38876
WBGene00001430	2.37375e-05	2.38801
WBGene00016242	0.000174507	2.38554
WBGene00020626	1.39668e-05	2.37843
WBGene00010747	9.12462e-06	2.37798
WBGene00009904	1.21167e-05	2.37738
WBGene00008726	7.58758e-06	2.37594
WBGene00008449	5.81899e-06	2.37477
WBGene00021095	6.39174e-06	2.37441
WBGene00017839	0.000112949	2.37369
WBGene00011530	2.47348e-05	2.37246
WBGene00000082	5.81713e-06	2.36914
WBGene00004811	0.000483879	2.36656
WBGene00010658	7.55497e-06	2.36212
WBGene00018706	8.40308e-06	2.36062
WBGene00194658	0.00422564	2.35721
WBGene00007949	0.000385373	2.35689
WBGene00004236	0.000125945	2.35659
WBGene00044662	0.00100411	2.35556
WBGene00003623	1.42801e-05	2.3548
WBGene00020484	0.000459948	2.34978
WBGene00013060	0.00552062	2.34688
WBGene00018377	0.00475433	2.34537
WBGene00007964	2.41045e-06	2.34049
WBGene00010267	6.47954e-06	2.33743
WBGene00003547	6.77463e-05	2.3362
WBGene00007925	5.59186e-06	2.3347
WBGene00007891	0.00281132	2.33015
WBGene00010032	0.00116933	2.32816
WBGene00008647	0.00290595	2.32533
WBGene00021526	0.00138999	2.32403
WBGene00045411	0.000972291	2.32008
WBGene00001698	0.00670663	2.3175
WBGene00010791	0.00537105	2.31551
WBGene00018675	0.000343741	2.31463
WBGene00006950	4.94146e-05	2.31404
WBGene00001894	0.000805164	2.31387
WBGene00001896	0.000805164	2.31387
WBGene00001926	0.000805164	2.31387
WBGene00001928	0.000805164	2.31387
WBGene00004230	4.77514e-06	2.31068
WBGene00044109	0.000163677	2.30649
WBGene00016106	1.88473e-06	2.30625
WBGene00015103	9.45944e-06	2.30538
WBGene00018829	0.00240377	2.30498
WBGene00020232	0.00547023	2.30482
WBGene00015153	7.53087e-05	2.3047
WBGene00017783	0.000136318	2.29743
WBGene00004104	6.62769e-05	2.2973
WBGene00044445	0.00027662	2.29726
WBGene00010184	0.000830337	2.29587
WBGene00003071	4.23302e-06	2.29476
WBGene00017526	0.00601132	2.29458
WBGene00003522	0.000365174	2.29387
WBGene00011762	0.0018141	2.29243
WBGene00012729	0.00229788	2.29207
WBGene00010069	0.000418821	2.28979
WBGene00000655	1.89773e-05	2.28765
WBGene00008655	1.60174e-05	2.28286
WBGene00003689	2.38612e-05	2.28238
WBGene00017267	5.31558e-05	2.28161
WBGene00017270	5.31558e-05	2.28161
WBGene00018556	0.0028197	2.28103
WBGene00018559	0.0028197	2.28103
WBGene00015079	0.000601774	2.28097
WBGene00009720	6.96875e-05	2.28097
WBGene00019919	0.00624391	2.28051
WBGene00006954	2.5968e-05	2.27726
WBGene00010899	3.11727e-06	2.27329
WBGene00017703	3.92492e-06	2.27184
WBGene00018300	1.22506e-05	2.2699
WBGene00014254	0.000190458	2.26535
WBGene00010589	0.00307475	2.26109
WBGene00007465	0.00188148	2.26072
WBGene00020396	2.99598e-05	2.25861
WBGene00011075	0.000262911	2.25729
WBGene00000220	3.13298e-05	2.25416
WBGene00000930	8.0689e-06	2.25365
WBGene00019570	0.00805593	2.25333
WBGene00010327	2.15173e-05	2.25288
WBGene00020882	0.00425298	2.24791
WBGene00004216	9.45944e-06	2.24779
WBGene00007770	0.00714203	2.247
WBGene00008483	5.09262e-05	2.24582
WBGene00009957	2.22194e-05	2.24348
WBGene00018647	0.000266425	2.24334
WBGene00019968	6.31093e-05	2.24298
WBGene00045481	0.00473377	2.2411
WBGene00020240	0.00115516	2.23922
WBGene00009503	3.65375e-05	2.23875
WBGene00009803	7.19478e-06	2.23701
WBGene00011594	1.53619e-05	2.23484
WBGene00007397	0.000113889	2.23482
WBGene00018591	0.000437398	2.23116
WBGene00017840	9.45944e-06	2.23108
WBGene00007916	3.64347e-05	2.2303
WBGene00015442	3.10556e-05	2.22875
WBGene00020972	7.92552e-06	2.2276
WBGene00043049	0.00100482	2.22676
WBGene00018172	7.83459e-05	2.22652
WBGene00001391	1.64622e-05	2.22295
WBGene00044480	0.00316503	2.22197
WBGene00011757	1.83881e-05	2.21474
WBGene00017359	0.00560107	2.21132
WBGene00020871	0.00749354	2.20998
WBGene00015040	0.000456948	2.20994
WBGene00008644	1.49098e-05	2.20742
WBGene00016164	0.000104574	2.20465
WBGene00016069	0.000174233	2.20373
WBGene00021232	0.00742866	2.20006
WBGene00009218	2.20807e-06	2.1993
WBGene00008929	2.63923e-05	2.19733
WBGene00017052	3.33956e-05	2.19577
WBGene00185095	0.00145354	2.19441
WBGene00020554	1.88473e-06	2.19359
WBGene00009356	8.75752e-05	2.19087
WBGene00012165	0.00063768	2.1894
WBGene00001577	1.73629e-05	2.18876
WBGene00008851	3.64347e-05	2.18523
WBGene00009433	2.84495e-06	2.18386
WBGene00189993	0.00949844	2.18207
WBGene00077697	2.54121e-05	2.18034
WBGene00020741	0.000193114	2.17933
WBGene00016293	0.00201771	2.17925
WBGene00009593	0.0022947	2.17492
WBGene00001701	0.00011783	2.17366
WBGene00010453	4.51831e-06	2.17253
WBGene00010396	1.37917e-05	2.17109
WBGene00019268	1.24045e-05	2.16761
WBGene00015042	0.00163243	2.16704
WBGene00015362	2.45351e-05	2.16533
WBGene00018969	1.88473e-06	2.16472
WBGene00016105	0.000983963	2.16458
WBGene00018472	5.94879e-05	2.16452
WBGene00019550	2.91343e-05	2.16367
WBGene00013592	6.79972e-05	2.16367
WBGene00022440	0.000799843	2.16318
WBGene00018713	8.46763e-05	2.16217
WBGene00009205	2.37742e-05	2.15786
WBGene00219410	0.00273031	2.15719
WBGene00269433	0.000698562	2.15702
WBGene00018176	0.000273047	2.15435
WBGene00021011	0.00026112	2.15059
WBGene00013385	7.7517e-05	2.14786
WBGene00001877	3.41175e-05	2.14647
WBGene00014094	0.000117108	2.14591
WBGene00004221	7.17345e-06	2.14348
WBGene00000745	0.000458618	2.14335
WBGene00018656	0.00010705	2.14005
WBGene00044073	1.37917e-05	2.14002
WBGene00050934	0.00676115	2.13985
WBGene00018227	6.67578e-05	2.13856
WBGene00009997	0.00889074	2.13819
WBGene00007170	3.67983e-06	2.13679
WBGene00044463	0.000146429	2.13402
WBGene00004150	3.49311e-05	2.13252
WBGene00022680	1.13615e-05	2.13161
WBGene00015859	5.90301e-06	2.13118
WBGene00018730	0.000104574	2.12753
WBGene00022018	0.000952308	2.12578
WBGene00044783	0.00845225	2.12196
WBGene00020560	2.09995e-06	2.11779
WBGene00020743	8.727e-05	2.11144
WBGene00007368	3.56417e-06	2.11065
WBGene00015218	1.10773e-05	2.11039
WBGene00018946	0.000795648	2.10749
WBGene00044811	0.000848341	2.1073
WBGene00011468	4.75824e-05	2.10364
WBGene00019761	3.64347e-05	2.10234
WBGene00000746	4.74692e-05	2.10095
WBGene00016996	1.71788e-05	2.10088
WBGene00019234	2.40405e-05	2.10026
WBGene00015335	9.80087e-05	2.09964
WBGene00003769	1.9485e-05	2.09682
WBGene00006955	7.55497e-06	2.09474
WBGene00017510	0.000129264	2.0932
WBGene00017963	0.00399705	2.09266
WBGene00021915	0.000307015	2.09116
WBGene00018572	2.66567e-05	2.08865
WBGene00013636	1.51594e-05	2.08706
WBGene00017560	9.00019e-06	2.08305
WBGene00003104	1.1493e-05	2.08253
WBGene00001570	3.52757e-06	2.07824
WBGene00012777	3.03122e-05	2.07792
WBGene00001707	9.59039e-05	2.07551
WBGene00013058	4.13817e-05	2.07547
WBGene00011104	0.000343433	2.07542
WBGene00008816	0.00619842	2.07259
WBGene00001671	0.00224572	2.07233
WBGene00008987	9.76777e-06	2.06792
WBGene00009573	4.66711e-05	2.06783
WBGene00018725	0.000178892	2.06739
WBGene00015947	0.000123218	2.06515
WBGene00006680	5.75102e-05	2.06061
WBGene00013352	3.48309e-06	2.06014
WBGene00013835	3.49686e-05	2.05922
WBGene00019198	7.02157e-05	2.05864
WBGene00007996	1.69011e-05	2.05673
WBGene00021772	0.000197058	2.055
WBGene00013573	0.00422611	2.05192
WBGene00016133	2.1611e-06	2.05094
WBGene00175027	0.000183411	2.05026
WBGene00011095	4.01721e-06	2.0496
WBGene00018283	2.48599e-05	2.04905
WBGene00017483	7.82966e-06	2.04798
WBGene00045497	0.00138164	2.0452
WBGene00008732	1.63636e-05	2.04031
WBGene00010769	0.000188944	2.03954
WBGene00016379	0.000296131	2.03912
WBGene00018643	4.28159e-05	2.03706
WBGene00013899	6.05491e-05	2.03674
WBGene00012491	0.000141698	2.03528
WBGene00044803	0.000260239	2.03469
WBGene00012728	0.000143056	2.03421
WBGene00010926	0.00257017	2.03345
WBGene00017807	2.212e-05	2.02902
WBGene00016598	1.60174e-05	2.02888
WBGene00195176	3.52297e-05	2.02869
WBGene00008496	5.62311e-05	2.02833
WBGene00007365	1.61256e-05	2.02696
WBGene00004115	5.90301e-06	2.02465
WBGene00009586	0.000327356	2.02241
WBGene00008617	0.0092546	2.01986
WBGene00013847	1.51013e-05	2.01908
WBGene00022179	0.000154727	2.01711
WBGene00013079	3.64347e-05	2.01497
WBGene00001760	0.000132536	2.0135
WBGene00011838	0.000198309	2.01035
WBGene00016276	0.000207012	2.00939
WBGene00044672	2.8352e-05	2.00908
WBGene00195168	0.000532846	2.00855
WBGene00008673	0.00315292	2.00697
WBGene00011328	7.09552e-05	2.00602
WBGene00008027	4.87275e-05	2.00597
WBGene00004017	2.94816e-05	2.0044
WBGene00012086	0.00731894	2.00376
WBGene00019166	2.20892e-06	2.00318
WBGene00018027	0.00254114	2.00156
WBGene00007876	0.00467357	1.99854
WBGene00000639	7.09188e-05	1.998
WBGene00013926	8.84715e-06	1.9973
WBGene00007240	0.0015692	1.99695
WBGene00000497	3.79793e-05	1.99592
WBGene00019593	0.000295244	1.99551
WBGene00012399	0.00109979	1.99449
WBGene00013215	0.000113125	1.99424
WBGene00013119	4.74293e-05	1.99377
WBGene00007372	2.37531e-05	1.9929
WBGene00015759	5.20856e-06	1.99254
WBGene00013450	0.00435864	1.99028
WBGene00022747	3.09518e-05	1.99008
WBGene00045400	0.000169388	1.989
WBGene00003408	3.54236e-06	1.98723
WBGene00005833	0.000311587	1.9863
WBGene00044395	0.000155238	1.98502
WBGene00010501	0.000722223	1.98468
WBGene00011362	0.00107126	1.98464
WBGene00020774	0.000414209	1.98334
WBGene00001719	9.78365e-06	1.98319
WBGene00014135	9.9804e-06	1.98278
WBGene00015268	0.000730608	1.98208
WBGene00206502	0.000418971	1.98193
WBGene00023416	0.000133293	1.98079
WBGene00000503	0.00189262	1.9803
WBGene00011796	1.08819e-05	1.97808
WBGene00020579	2.59925e-06	1.97493
WBGene00013673	0.000292585	1.97418
WBGene00002233	7.5873e-05	1.97274
WBGene00012824	0.000105689	1.97096
WBGene00010291	0.00244576	1.96959
WBGene00010461	0.00109333	1.9683
WBGene00007367	0.00920188	1.96667
WBGene00010330	0.000317298	1.96516
WBGene00011190	1.52969e-05	1.96238
WBGene00021167	1.89373e-05	1.95997
WBGene00022544	0.00824636	1.95953
WBGene00000022	3.57212e-05	1.95841
WBGene00007467	0.00909162	1.95823
WBGene00016625	7.76997e-05	1.95729
WBGene00015878	0.000303433	1.95503
WBGene00013457	1.64622e-05	1.95243
WBGene00022104	0.000141401	1.95186
WBGene00017892	1.64622e-05	1.95137
WBGene00009183	0.000154059	1.94945
WBGene00016484	0.00306457	1.9478
WBGene00018487	5.0473e-06	1.94669
WBGene00045494	0.000970688	1.94558
WBGene00015426	0.00153008	1.94462
WBGene00010505	0.000241266	1.94306
WBGene00268213	0.00615576	1.94219
WBGene00019112	0.00278883	1.94183
WBGene00015884	0.000373282	1.94104
WBGene00000755	3.67314e-05	1.93861
WBGene00012796	1.87633e-05	1.93754
WBGene00020571	0.000117577	1.93444
WBGene00016481	2.69619e-05	1.93335
WBGene00020487	0.00119505	1.93168
WBGene00003096	1.82612e-05	1.93114
WBGene00004048	6.47954e-06	1.9311
WBGene00000212	2.88625e-06	1.92834
WBGene00007694	0.000120582	1.92595
WBGene00011836	1.85891e-05	1.9246
WBGene00013621	0.0096356	1.92145
WBGene00013471	0.00240476	1.92064
WBGene00003089	5.22089e-06	1.92048
WBGene00044446	0.000123092	1.9204
WBGene00021083	5.51004e-06	1.91996
WBGene00020983	0.000332189	1.91883
WBGene00018587	0.00033562	1.91776
WBGene00020134	1.35475e-05	1.91774
WBGene00009432	7.82266e-05	1.91729
WBGene00013960	0.000186586	1.915
WBGene00017484	0.00320643	1.91364
WBGene00003532	0.000126112	1.91013
WBGene00011833	9.30308e-05	1.90761
WBGene00011938	1.69011e-05	1.90615
WBGene00044138	0.00076473	1.90565
WBGene00303364	0.000601943	1.90524
WBGene00018931	3.94414e-05	1.90314
WBGene00018760	0.000337178	1.90286
WBGene00011522	0.000119614	1.90227
WBGene00010752	0.000875624	1.90199
WBGene00009431	3.11714e-06	1.89983
WBGene00011023	0.000697871	1.89727
WBGene00017678	1.98157e-06	1.89578
WBGene00017754	0.000156406	1.89554
WBGene00044533	0.000890867	1.89406
WBGene00003879	6.99918e-06	1.89296
WBGene00012176	0.00330779	1.89218
WBGene00013825	0.0025687	1.89036
WBGene00008500	2.47348e-05	1.88838
WBGene00020130	0.000319415	1.8868
WBGene00010928	0.000215785	1.88621
WBGene00009144	0.00202406	1.88378
WBGene00219294	0.00177831	1.88345
WBGene00002248	3.10556e-05	1.88154
WBGene00015152	0.00128825	1.8801
WBGene00017170	0.00889091	1.8781
WBGene00012144	3.31421e-06	1.87768
WBGene00016817	1.3855e-05	1.87418
WBGene00019101	0.000248166	1.8736
WBGene00001984	2.74925e-05	1.87345
WBGene00002039	4.49781e-06	1.87312
WBGene00019906	0.000197459	1.87001
WBGene00010830	2.01842e-05	1.86983
WBGene00015537	0.00281115	1.86969
WBGene00019779	2.14158e-06	1.8695
WBGene00011098	0.00211429	1.86881
WBGene00018743	5.41479e-05	1.86577
WBGene00021635	3.00236e-06	1.86449
WBGene00003091	2.21282e-06	1.86205
WBGene00010047	5.25581e-06	1.86124
WBGene00013897	0.00124944	1.85315
WBGene00044620	5.51004e-06	1.85282
WBGene00021403	2.63716e-05	1.85179
WBGene00021407	2.63716e-05	1.85179
WBGene00022847	0.000747989	1.84977
WBGene00018731	0.00012821	1.84742
WBGene00007919	0.00012821	1.84338
WBGene00015602	0.000807646	1.84153
WBGene00009541	0.00111952	1.8415
WBGene00020574	0.000754175	1.84131
WBGene00001878	0.00017717	1.83671
WBGene00044297	0.00287477	1.83425
WBGene00018619	0.000183411	1.8335
WBGene00007638	0.00279993	1.83236
WBGene00012945	0.00279993	1.83236
WBGene00016259	9.20158e-05	1.83158
WBGene00012398	0.000298817	1.83068
WBGene00017530	2.79943e-05	1.83053
WBGene00011097	0.000871585	1.82856
WBGene00008492	3.54236e-06	1.82298
WBGene00011830	1.32129e-05	1.82036
WBGene00001817	5.72985e-06	1.81867
WBGene00016984	8.6598e-05	1.81612
WBGene00008616	0.00192866	1.81513
WBGene00012068	0.000793357	1.81371
WBGene00001721	0.00172342	1.81194
WBGene00004155	0.00025638	1.80957
WBGene00000651	0.00308519	1.8073
WBGene00001242	2.212e-05	1.80628
WBGene00020128	8.6413e-06	1.80583
WBGene00018562	6.19579e-05	1.80227
WBGene00001067	6.31093e-05	1.80074
WBGene00022736	1.47078e-05	1.80058
WBGene00219436	3.50275e-05	1.80027
WBGene00008220	2.58371e-05	1.80017
WBGene00017438	6.31629e-06	1.79846
WBGene00015541	2.37531e-05	1.79789
WBGene00020618	0.00569375	1.79678
WBGene00015718	0.00107605	1.79626
WBGene00018707	8.55305e-05	1.79614
WBGene00010684	0.00343878	1.7935
WBGene00013180	6.2353e-05	1.79285
WBGene00002051	0.00303558	1.79154
WBGene00005640	0.0054598	1.79012
WBGene00019843	9.21947e-06	1.79009
WBGene00018260	2.82078e-05	1.78864
WBGene00017277	0.00934301	1.78862
WBGene00009355	0.000111149	1.78733
WBGene00015393	0.000141401	1.78709
WBGene00077489	0.00647284	1.78632
WBGene00022196	7.41797e-06	1.78582
WBGene00006367	5.51004e-06	1.78327
WBGene00006639	0.000201408	1.783
WBGene00009418	0.00271422	1.78281
WBGene00009857	0.000260529	1.78228
WBGene00015692	5.4299e-06	1.78172
WBGene00007153	2.59925e-06	1.7811
WBGene00017329	2.95992e-05	1.78073
WBGene00017308	0.00835887	1.77966
WBGene00001772	5.12213e-05	1.779
WBGene00000882	2.64735e-05	1.77824
WBGene00010010	0.000191743	1.77803
WBGene00001727	0.000715041	1.77761
WBGene00001428	1.72392e-05	1.77729
WBGene00010660	2.51141e-06	1.77613
WBGene00011004	0.00121142	1.77573
WBGene00004855	1.77476e-05	1.77304
WBGene00004013	5.5224e-06	1.77245
WBGene00006643	0.00565525	1.7724
WBGene00008512	2.39153e-05	1.7723
WBGene00009625	0.00239917	1.77158
WBGene00003841	0.00174731	1.7695
WBGene00018354	7.93957e-05	1.76758
WBGene00000697	0.00757891	1.76747
WBGene00019718	0.00163931	1.7672
WBGene00015076	0.000623442	1.76701
WBGene00019213	7.55497e-06	1.76639
WBGene00003388	3.98123e-06	1.76595
WBGene00005078	0.000698694	1.76571
WBGene00000905	0.000156307	1.76005
WBGene00011307	1.95298e-05	1.75984
WBGene00015139	0.000141536	1.75949
WBGene00001074	0.000235201	1.75656
WBGene00194737	0.00488017	1.75592
WBGene00018268	2.37531e-05	1.75556
WBGene00019967	6.95055e-06	1.75487
WBGene00022038	1.43158e-05	1.75325
WBGene00011099	0.00123269	1.75296
WBGene00008152	0.00123041	1.75183
WBGene00018041	0.000339389	1.75075
WBGene00009998	0.00281161	1.74922
WBGene00018645	9.83406e-06	1.74894
WBGene00000683	0.000111149	1.7468
WBGene00005652	0.000112916	1.74611
WBGene00012525	0.000281404	1.74471
WBGene00018385	0.00580802	1.74393
WBGene00001387	1.57999e-05	1.73921
WBGene00004992	0.000336614	1.73846
WBGene00011971	0.00195572	1.73754
WBGene00016407	6.41428e-06	1.73703
WBGene00003915	3.8342e-05	1.73575
WBGene00019236	2.40352e-05	1.73572
WBGene00004092	4.36062e-05	1.73521
WBGene00006470	6.48257e-06	1.73482
WBGene00003542	0.000541805	1.73436
WBGene00045207	0.00285209	1.73364
WBGene00012670	0.000515984	1.73343
WBGene00008390	1.28139e-05	1.73315
WBGene00018702	1.60174e-05	1.73178
WBGene00003889	0.00655262	1.72807
WBGene00013263	7.17345e-06	1.72787
WBGene00009723	1.98272e-05	1.72723
WBGene00017429	6.10778e-06	1.72623
WBGene00000016	5.95306e-05	1.72619
WBGene00011977	7.92552e-06	1.72536
WBGene00007252	2.73595e-05	1.7238
WBGene00206373	2.54121e-05	1.72349
WBGene00016429	0.000108258	1.72298
WBGene00009500	0.00033347	1.72271
WBGene00012381	0.00155854	1.72246
WBGene00001006	4.71573e-06	1.72131
WBGene00019644	3.44874e-05	1.72115
WBGene00012783	1.43146e-05	1.72083
WBGene00012626	0.000956867	1.71887
WBGene00007932	6.46329e-05	1.7167
WBGene00007470	0.00677516	1.71475
WBGene00019659	0.000148417	1.71382
WBGene00077770	1.37917e-05	1.71187
WBGene00194695	0.00283767	1.71177
WBGene00015453	9.9477e-06	1.71171
WBGene00004025	1.10192e-05	1.71018
WBGene00003862	0.00091475	1.7069
WBGene00010759	9.9654e-05	1.70668
WBGene00019839	2.94528e-05	1.70619
WBGene00020620	0.00348841	1.70381
WBGene00014006	4.68923e-06	1.70179
WBGene00014047	0.00123868	1.70111
WBGene00010749	4.23302e-06	1.69818
WBGene00016340	0.00167876	1.69767
WBGene00013749	0.00971471	1.69654
WBGene00011643	6.04496e-05	1.69619
WBGene00007362	6.39757e-05	1.69489
WBGene00016196	2.92493e-05	1.69242
WBGene00000739	0.00017717	1.69238
WBGene00008314	1.70416e-05	1.69153
WBGene00017255	0.00348841	1.69134
WBGene00018750	0.00266826	1.68878
WBGene00017970	8.05705e-06	1.68826
WBGene00015569	0.000156307	1.68805
WBGene00022445	0.000162929	1.68655
WBGene00012396	0.000206616	1.68441
WBGene00004211	0.000343433	1.68308
WBGene00013608	0.00305864	1.68137
WBGene00003847	3.54236e-06	1.68122
WBGene00001476	7.17345e-06	1.68072
WBGene00012596	0.00349294	1.68025
WBGene00001159	1.60174e-05	1.68019
WBGene00017421	0.000118294	1.6791
WBGene00019751	0.000572625	1.67619
WBGene00011999	5.75229e-05	1.67518
WBGene00015933	2.74412e-06	1.67513
WBGene00007836	0.000164198	1.6743
WBGene00007247	0.00442759	1.6682
WBGene00012776	7.02742e-05	1.66686
WBGene00010134	7.71518e-06	1.66604
WBGene00010509	0.000157215	1.66506
WBGene00022327	0.00105331	1.66423
WBGene00009397	2.09995e-06	1.66155
WBGene00015546	0.000623605	1.66134
WBGene00000649	6.8784e-05	1.66105
WBGene00010977	1.60905e-05	1.66077
WBGene00001148	2.74412e-06	1.66076
WBGene00008146	0.00329518	1.6602
WBGene00013197	5.51004e-06	1.65953
WBGene00004225	9.83406e-06	1.65924
WBGene00018682	3.11714e-06	1.65794
WBGene00007460	4.33822e-05	1.65595
WBGene00003553	3.00236e-06	1.65303
WBGene00010222	0.000470528	1.65266
WBGene00011417	0.000111091	1.65227
WBGene00011420	0.000111091	1.65227
WBGene00018353	3.32482e-05	1.64968
WBGene00016976	0.00013969	1.64943
WBGene00009155	0.000375957	1.64774
WBGene00077521	2.86204e-05	1.64721
WBGene00019146	0.000250695	1.64705
WBGene00020034	0.00860136	1.64677
WBGene00001184	2.37531e-05	1.64572
WBGene00003605	0.000185927	1.63983
WBGene00044457	6.47954e-06	1.63712
WBGene00016282	2.54173e-05	1.63637
WBGene00002188	0.000185378	1.63635
WBGene00015645	5.95306e-05	1.63397
WBGene00003640	1.70416e-05	1.63196
WBGene00001768	1.3855e-05	1.6312
WBGene00021917	0.00134788	1.63016
WBGene00003653	6.70272e-05	1.62964
WBGene00020551	1.60174e-05	1.62715
WBGene00006331	1.933e-05	1.62569
WBGene00022843	0.00569101	1.62505
WBGene00019973	7.4174e-05	1.62328
WBGene00008226	0.000148134	1.62327
WBGene00020235	7.55497e-06	1.62263
WBGene00021397	0.000329657	1.62144
WBGene00021641	6.49399e-06	1.62104
WBGene00010917	0.00881738	1.62069
WBGene00010746	0.00944208	1.61962
WBGene00011130	0.00219501	1.61959
WBGene00194915	0.00522681	1.61911
WBGene00015479	3.47221e-05	1.61808
WBGene00020327	0.0038407	1.61647
WBGene00015044	0.000809663	1.61306
WBGene00019525	0.000552332	1.61273
WBGene00044206	5.54344e-05	1.61261
WBGene00019597	8.57428e-05	1.61167
WBGene00194708	8.47635e-05	1.61074
WBGene00044396	2.25065e-05	1.60962
WBGene00007210	1.64622e-05	1.60945
WBGene00000625	0.000693546	1.60882
WBGene00013559	1.2979e-05	1.6078
WBGene00009024	0.00237155	1.60626
WBGene00003995	1.05369e-05	1.6057
WBGene00020703	0.000180208	1.60562
WBGene00012947	4.6703e-05	1.60267
WBGene00194815	0.00344382	1.60192
WBGene00000002	1.22784e-05	1.6018
WBGene00001429	7.55497e-06	1.60156
WBGene00020455	3.32571e-05	1.60148
WBGene00018411	0.00489498	1.60136
WBGene00001089	2.59925e-06	1.59965
WBGene00018921	2.37531e-05	1.59831
WBGene00007322	0.00192517	1.59807
WBGene00019329	9.76777e-06	1.59782
WBGene00001781	0.00193643	1.59642
WBGene00020343	6.08956e-05	1.59629
WBGene00016860	1.10773e-05	1.59587
WBGene00000287	0.00123863	1.59578
WBGene00013837	0.00194249	1.59453
WBGene00001078	3.31972e-05	1.59349
WBGene00019284	5.61584e-05	1.59161
WBGene00020728	0.00172801	1.59135
WBGene00000646	4.51831e-06	1.58943
WBGene00000685	0.000303008	1.58294
WBGene00015900	0.0055127	1.58174
WBGene00045024	0.000326946	1.5806
WBGene00015473	0.007607	1.57904
WBGene00043062	7.55497e-06	1.578
WBGene00015984	0.000807646	1.57798
WBGene00045412	0.00671118	1.57769
WBGene00003710	6.17169e-05	1.57629
WBGene00020911	1.92954e-05	1.56947
WBGene00022423	1.37227e-05	1.56795
WBGene00016877	0.000215414	1.5671
WBGene00003107	2.48599e-05	1.56325
WBGene00011520	0.000785278	1.56254
WBGene00006987	0.000202792	1.5617
WBGene00012451	0.00752438	1.56033
WBGene00016044	0.000769044	1.5576
WBGene00001483	0.000273015	1.55745
WBGene00017068	0.000107175	1.55406
WBGene00019782	0.000771319	1.55326
WBGene00006687	0.00216842	1.54984
WBGene00001118	0.000395052	1.5484
WBGene00017424	0.0028966	1.54728
WBGene00011798	0.00153199	1.54593
WBGene00021158	0.00328842	1.54572
WBGene00009859	0.00211429	1.54551
WBGene00003681	3.7099e-05	1.54528
WBGene00195004	0.000117942	1.54474
WBGene00021213	1.89532e-05	1.54412
WBGene00010457	0.000766036	1.54363
WBGene00219316	2.8352e-05	1.54361
WBGene00206525	0.00212097	1.54316
WBGene00000626	4.98603e-06	1.54251
WBGene00011220	0.00508691	1.54186
WBGene00000615	1.82541e-05	1.54169
WBGene00021309	4.64553e-05	1.54081
WBGene00019859	0.000234102	1.53968
WBGene00000778	0.00110575	1.53925
WBGene00008215	1.43234e-05	1.53922
WBGene00001066	0.000339746	1.53918
WBGene00220250	0.000771064	1.53774
WBGene00012449	0.000843814	1.53754
WBGene00017571	9.30199e-06	1.53723
WBGene00000044	0.00256139	1.53132
WBGene00000990	7.38618e-05	1.53065
WBGene00044797	0.000593758	1.52972
WBGene00010566	0.000120203	1.52928
WBGene00003075	0.000125851	1.52863
WBGene00020379	0.000157874	1.52793
WBGene00021300	0.00219501	1.52718
WBGene00017447	5.36354e-06	1.52717
WBGene00000792	2.75599e-05	1.52394
WBGene00004764	6.9862e-05	1.52344
WBGene00012437	0.00134401	1.52304
WBGene00009060	0.000281131	1.52282
WBGene00001786	8.22576e-05	1.52132
WBGene00010722	0.000203284	1.52013
WBGene00017660	0.000220436	1.52009
WBGene00010750	2.89593e-05	1.51855
WBGene00020663	0.00535972	1.51673
WBGene00018761	0.00688678	1.51596
WBGene00009722	4.11872e-05	1.5159
WBGene00020698	0.00085552	1.51579
WBGene00007154	0.00119961	1.5127
WBGene00015708	0.00577691	1.51173
WBGene00007999	4.94921e-05	1.50959
WBGene00020919	0.000135949	1.50898
WBGene00013312	0.000129677	1.50881
WBGene00020646	5.03143e-05	1.50747
WBGene00015968	8.18849e-05	1.5059
WBGene00010972	0.000664089	1.50584
WBGene00011737	6.85844e-06	1.50577
WBGene00007913	5.50328e-05	1.50459
WBGene00003688	0.000207399	1.50352
WBGene00006807	0.00182886	1.50047
WBGene00020010	0.000442387	1.49963
WBGene00007953	0.00103956	1.49819
WBGene00017959	0.000336032	1.49806
WBGene00009899	7.9088e-06	1.49689
WBGene00284854	0.0038604	1.49661
WBGene00138719	7.64429e-05	1.49539
WBGene00009839	0.00110711	1.49468
WBGene00006923	5.51004e-06	1.49446
WBGene00000401	0.000171019	1.49366
WBGene00044437	0.0043463	1.49346
WBGene00044294	4.55323e-06	1.49322
WBGene00018566	9.24e-05	1.49284
WBGene00001633	5.59905e-05	1.49189
WBGene00015046	0.000192082	1.4898
WBGene00007802	0.0014803	1.48964
WBGene00001045	0.00011369	1.48847
WBGene00001400	0.00259431	1.4879
WBGene00009383	5.09015e-05	1.48765
WBGene00013865	0.00019889	1.48434
WBGene00009490	0.0011956	1.48405
WBGene00015672	0.00105331	1.48293
WBGene00018823	4.50534e-06	1.48138
WBGene00020785	0.00968561	1.47978
WBGene00000711	0.000454669	1.47972
WBGene00000992	1.22506e-05	1.47932
WBGene00007055	3.54315e-06	1.47889
WBGene00008221	0.000481545	1.47683
WBGene00000484	0.00306112	1.47548
WBGene00044568	0.00641235	1.47375
WBGene00016962	5.21249e-05	1.47144
WBGene00013622	0.000765926	1.47011
WBGene00021086	0.00339879	1.46882
WBGene00004394	4.44402e-05	1.46844
WBGene00013969	3.2087e-05	1.46835
WBGene00006852	4.28124e-05	1.46752
WBGene00010742	1.22506e-05	1.46752
WBGene00045246	0.000652448	1.46723
WBGene00008519	0.00098879	1.46671
WBGene00017466	0.00784375	1.46628
WBGene00006865	0.000105388	1.46613
WBGene00013555	0.00138997	1.46185
WBGene00018478	0.00359797	1.46013
WBGene00022106	0.000368668	1.45943
WBGene00007233	0.00124596	1.45816
WBGene00020869	0.000151338	1.45737
WBGene00007317	8.57881e-05	1.45724
WBGene00021247	1.76967e-05	1.45685
WBGene00008091	7.10346e-05	1.45662
WBGene00219325	0.0025602	1.4555
WBGene00010948	7.98995e-05	1.45493
WBGene00003757	0.00341129	1.4541
WBGene00005131	0.00817775	1.44998
WBGene00008652	1.54176e-05	1.4493
WBGene00020426	1.05397e-05	1.44891
WBGene00010597	9.78365e-06	1.44868
WBGene00015400	5.99758e-05	1.44812
WBGene00006869	6.89622e-05	1.44643
WBGene00005644	0.000169388	1.44349
WBGene00007811	8.05705e-06	1.44185
WBGene00001854	1.67037e-05	1.43951
WBGene00016273	0.00110626	1.43925
WBGene00017437	5.80676e-05	1.43886
WBGene00015518	0.000450941	1.4385
WBGene00022180	0.000669108	1.43786
WBGene00013574	0.000452611	1.43651
WBGene00004057	5.04236e-05	1.43519
WBGene00015148	1.58857e-05	1.4338
WBGene00009226	2.26143e-05	1.43295
WBGene00006525	0.00812263	1.43261
WBGene00012462	4.38434e-05	1.43186
WBGene00012222	7.91045e-05	1.42733
WBGene00007835	0.000406628	1.42663
WBGene00018113	2.39974e-05	1.42504
WBGene00009819	0.00467289	1.42203
WBGene00011948	0.00242389	1.42145
WBGene00012825	7.82346e-05	1.42143
WBGene00000932	0.000494019	1.42038
WBGene00015057	8.43987e-06	1.41818
WBGene00007600	2.57255e-05	1.41696
WBGene00000674	0.000501565	1.41595
WBGene00000070	1.69011e-05	1.4153
WBGene00013367	0.00319934	1.4146
WBGene00006882	8.43069e-05	1.41441
WBGene00000748	0.000326725	1.4134
WBGene00000610	0.00225439	1.41305
WBGene00018906	0.00206183	1.41117
WBGene00012629	0.00142908	1.41073
WBGene00016456	7.70296e-05	1.40932
WBGene00009396	4.74655e-06	1.40848
WBGene00008485	0.000141536	1.40736
WBGene00007375	0.00102072	1.406
WBGene00194664	0.0036009	1.40489
WBGene00001556	0.00446172	1.40276
WBGene00044182	0.000714521	1.40218
WBGene00007755	0.000244139	1.40153
WBGene00003100	0.00084959	1.40073
WBGene00016152	0.000193114	1.39987
WBGene00018067	0.00840049	1.39913
WBGene00006418	4.66351e-05	1.39909
WBGene00013949	0.000637178	1.39762
WBGene00010328	8.99651e-05	1.39735
WBGene00006372	1.26368e-05	1.39711
WBGene00016968	0.000260194	1.39686
WBGene00017842	6.46066e-05	1.39609
WBGene00014989	0.00168306	1.39566
WBGene00018809	0.00568388	1.39538
WBGene00011957	0.00730037	1.3949
WBGene00013330	0.00185542	1.39401
WBGene00008132	1.13839e-05	1.39358
WBGene00003591	0.000218175	1.39334
WBGene00020817	0.00257185	1.39169
WBGene00017339	1.63018e-05	1.38978
WBGene00015336	1.89373e-05	1.38593
WBGene00012819	0.000394382	1.3828
WBGene00008177	0.000245126	1.38222
WBGene00012239	0.000120623	1.38126
WBGene00000742	0.000508514	1.38
WBGene00020479	3.84551e-05	1.37999
WBGene00004056	0.000144474	1.37961
WBGene00018383	0.0083842	1.37887
WBGene00011453	0.00198641	1.37885
WBGene00020887	0.000544974	1.37535
WBGene00019756	0.000119387	1.37496
WBGene00021253	7.82966e-06	1.37443
WBGene00011285	0.00360487	1.37249
WBGene00009257	5.08348e-05	1.37194
WBGene00017040	0.00336183	1.37165
WBGene00018502	9.63771e-05	1.37163
WBGene00019832	0.000385018	1.3715
WBGene00001879	0.00218369	1.37071
WBGene00021870	8.40308e-06	1.37013
WBGene00021872	8.15473e-05	1.36999
WBGene00000062	0.00220362	1.36853
WBGene00007801	5.52314e-05	1.36822
WBGene00020118	0.00579718	1.36759
WBGene00004854	1.89552e-05	1.36714
WBGene00006748	0.00294343	1.36568
WBGene00011185	9.92889e-05	1.36475
WBGene00003167	0.0025213	1.36444
WBGene00011850	0.000505166	1.36222
WBGene00022374	0.00267874	1.36066
WBGene00003981	4.67673e-06	1.36038
WBGene00018073	5.81713e-06	1.35832
WBGene00011590	1.08819e-05	1.35831
WBGene00009381	0.00161522	1.35805
WBGene00003001	9.04637e-05	1.3572
WBGene00020368	0.000850482	1.35704
WBGene00018899	0.00363488	1.35634
WBGene00001637	2.74223e-05	1.35558
WBGene00004140	1.28113e-05	1.35519
WBGene00008495	5.87296e-06	1.35476
WBGene00017265	0.000512404	1.35434
WBGene00011760	0.000101265	1.35368
WBGene00003768	0.00062376	1.35357
WBGene00015615	0.000998283	1.35149
WBGene00003523	3.64347e-05	1.3511
WBGene00009750	0.00455382	1.35109
WBGene00008101	3.33366e-05	1.35053
WBGene00011756	2.91343e-05	1.35034
WBGene00008033	6.31093e-05	1.34839
WBGene00012450	0.00272133	1.34743
WBGene00007405	0.000667689	1.34559
WBGene00011763	0.0022019	1.34552
WBGene00000482	1.92954e-05	1.34447
WBGene00009677	6.48892e-05	1.34388
WBGene00017335	7.99045e-05	1.34151
WBGene00022665	1.36256e-05	1.34108
WBGene00015286	0.000363314	1.34082
WBGene00012464	5.6999e-05	1.34028
WBGene00002142	0.000661457	1.34008
WBGene00008047	5.54344e-05	1.33778
WBGene00009804	0.000877651	1.33693
WBGene00010898	0.00629276	1.33668
WBGene00015882	0.000359076	1.33666
WBGene00005936	0.000822116	1.33649
WBGene00012420	0.00607588	1.33506
WBGene00006649	1.57929e-05	1.33504
WBGene00021788	0.0073235	1.33492
WBGene00008746	0.0012814	1.33458
WBGene00011593	0.0021004	1.33293
WBGene00194670	0.00619469	1.33012
WBGene00007214	0.000374003	1.32948
WBGene00003165	0.00028669	1.32677
WBGene00009162	5.79316e-05	1.32657
WBGene00021235	6.46066e-05	1.32655
WBGene00016424	0.000405245	1.32599
WBGene00013387	0.000509906	1.32565
WBGene00001475	0.000342692	1.3245
WBGene00007823	1.89773e-05	1.322
WBGene00001731	0.000221244	1.32195
WBGene00004395	6.08956e-05	1.32187
WBGene00001073	4.74655e-06	1.31958
WBGene00044355	0.000373353	1.3191
WBGene00016556	0.00540703	1.31726
WBGene00012545	1.59475e-05	1.31717
WBGene00019868	8.02019e-05	1.31594
WBGene00009528	5.70154e-05	1.31589
WBGene00021087	0.00793992	1.31559
WBGene00009717	1.35489e-05	1.31405
WBGene00020920	8.01191e-05	1.31391
WBGene00018052	0.000157874	1.31171
WBGene00000968	0.00040112	1.31116
WBGene00012260	0.0017785	1.31073
WBGene00017379	0.00990308	1.31011
WBGene00018297	0.000738245	1.30863
WBGene00009927	0.00451132	1.30762
WBGene00001824	6.08956e-05	1.30736
WBGene00044029	0.000122774	1.30725
WBGene00008599	6.7864e-05	1.30654
WBGene00021249	0.000104574	1.30646
WBGene00021928	4.17917e-05	1.30562
WBGene00020714	0.00715309	1.30555
WBGene00010123	7.30086e-05	1.30325
WBGene00045013	0.00084959	1.30265
WBGene00006657	0.000275798	1.30186
WBGene00019190	0.00229487	1.30176
WBGene00010998	2.58861e-05	1.30109
WBGene00020017	0.000240541	1.29936
WBGene00013982	0.00214419	1.29903
WBGene00011235	4.83402e-05	1.29895
WBGene00015035	0.000120223	1.29878
WBGene00044903	0.00153825	1.29847
WBGene00006467	1.87003e-05	1.29802
WBGene00001715	0.00831235	1.29774
WBGene00006662	8.46763e-05	1.29621
WBGene00077714	0.00131061	1.29521
WBGene00017950	6.39316e-05	1.29503
WBGene00011888	2.71866e-05	1.29461
WBGene00077669	0.00590977	1.29408
WBGene00013049	0.00528826	1.29402
WBGene00007605	8.38369e-06	1.29392
WBGene00010907	0.0010247	1.2937
WBGene00011263	2.84861e-05	1.29344
WBGene00018696	0.00506457	1.29338
WBGene00016677	1.82541e-05	1.29084
WBGene00017947	8.71175e-05	1.29053
WBGene00020707	0.000101088	1.28979
WBGene00010870	6.31944e-05	1.28978
WBGene00016017	0.00720701	1.28948
WBGene00015494	0.000131051	1.28848
WBGene00020045	0.0086946	1.28825
WBGene00009227	0.00582241	1.28752
WBGene00008392	0.00105339	1.28655
WBGene00020672	2.74326e-05	1.28643
WBGene00235330	0.00157793	1.28623
WBGene00016731	0.000380773	1.28494
WBGene00015388	0.000185977	1.28441
WBGene00235133	0.00334058	1.28408
WBGene00006746	0.00022019	1.28322
WBGene00010683	0.00957151	1.28273
WBGene00007483	0.00494586	1.28198
WBGene00017687	7.57446e-05	1.28074
WBGene00023414	0.000343714	1.27979
WBGene00077593	0.00537515	1.27959
WBGene00006897	0.00115418	1.27914
WBGene00010540	1.06389e-05	1.27907
WBGene00018917	0.00217994	1.27824
WBGene00015680	5.51004e-06	1.27734
WBGene00008999	6.31717e-06	1.27672
WBGene00007490	0.00480918	1.2755
WBGene00020849	0.00247909	1.27463
WBGene00017637	0.000321589	1.27329
WBGene00015522	0.00090768	1.27282
WBGene00018195	0.000255731	1.27262
WBGene00007716	0.00110245	1.27108
WBGene00044654	0.00367664	1.27088
WBGene00206530	0.00213574	1.27078
WBGene00018594	3.46049e-05	1.26931
WBGene00015067	5.09015e-05	1.26726
WBGene00000747	0.000234209	1.26657
WBGene00015435	0.00806623	1.26576
WBGene00009466	0.00132224	1.26567
WBGene00011238	0.00247136	1.2651
WBGene00045208	0.000898401	1.26482
WBGene00008309	0.000223347	1.2641
WBGene00021256	0.000252338	1.26342
WBGene00006522	0.00317839	1.26208
WBGene00016094	0.0016751	1.262
WBGene00012940	0.00176809	1.26088
WBGene00018758	4.2485e-05	1.25941
WBGene00017443	0.000329485	1.25827
WBGene00006444	9.31423e-06	1.25795
WBGene00001976	6.08956e-05	1.25643
WBGene00016646	0.00076473	1.25598
WBGene00016649	0.00076473	1.25598
WBGene00016218	2.87832e-05	1.25582
WBGene00002110	3.06451e-05	1.25515
WBGene00022572	0.00247984	1.25493
WBGene00020501	0.00109874	1.25242
WBGene00001207	0.000528028	1.25219
WBGene00044495	0.00205742	1.25218
WBGene00020766	0.000678859	1.25125
WBGene00010647	0.00306457	1.251
WBGene00018910	9.45944e-06	1.24936
WBGene00021224	9.45944e-06	1.24936
WBGene00015647	3.11813e-05	1.24893
WBGene00000862	0.00321342	1.24764
WBGene00006981	0.0014846	1.24749
WBGene00000603	0.00061455	1.24702
WBGene00002987	0.0073719	1.2467
WBGene00006424	8.75752e-05	1.24641
WBGene00007266	0.000256457	1.24614
WBGene00020561	0.000583144	1.24612
WBGene00022519	3.68894e-05	1.24581
WBGene00016783	0.00102249	1.24546
WBGene00007257	0.000235907	1.24537
WBGene00014008	0.000469039	1.24283
WBGene00045397	7.65462e-05	1.24215
WBGene00006873	0.00620771	1.24198
WBGene00011476	9.92503e-05	1.24183
WBGene00011592	0.00106363	1.24048
WBGene00016119	0.000689487	1.24027
WBGene00009304	0.000109054	1.23992
WBGene00020421	0.000235705	1.23834
WBGene00009288	8.35832e-05	1.23769
WBGene00015574	0.000685536	1.23668
WBGene00012124	0.000149871	1.23659
WBGene00016335	5.81713e-06	1.23647
WBGene00007515	0.000475323	1.23609
WBGene00012101	0.000290471	1.23409
WBGene00195068	0.00721285	1.23371
WBGene00194982	0.00945853	1.2323
WBGene00020735	2.59663e-05	1.23174
WBGene00011772	0.000212553	1.23155
WBGene00044303	0.00601603	1.23122
WBGene00003247	1.59475e-05	1.23077
WBGene00000903	8.26684e-05	1.23065
WBGene00007951	0.000262087	1.23056
WBGene00016517	0.00827996	1.22997
WBGene00011070	7.48814e-05	1.22978
WBGene00010851	0.00050402	1.22976
WBGene00006363	0.000136138	1.22962
WBGene00020276	0.00402776	1.22944
WBGene00012302	0.000686747	1.22825
WBGene00006364	5.55117e-05	1.22792
WBGene00007867	2.28957e-05	1.22787
WBGene00044607	0.00109035	1.22678
WBGene00015376	0.00216842	1.22672
WBGene00018704	2.01842e-05	1.22661
WBGene00014099	0.000974564	1.22615
WBGene00014181	0.000222577	1.22473
WBGene00006745	4.64686e-05	1.22371
WBGene00000647	0.000782309	1.2231
WBGene00001880	0.00217748	1.22299
WBGene00016894	1.50369e-05	1.22186
WBGene00018466	0.000237592	1.22185
WBGene00001687	0.000102917	1.2217
WBGene00012952	0.00209142	1.2213
WBGene00003518	3.64419e-05	1.22062
WBGene00003143	9.47173e-05	1.21915
WBGene00019609	9.30308e-05	1.21879
WBGene00007593	9.14594e-06	1.21867
WBGene00021340	3.54776e-05	1.21852
WBGene00010795	0.000105814	1.21841
WBGene00000599	0.000908249	1.21719
WBGene00009579	0.000707032	1.21688
WBGene00018744	2.27804e-05	1.21623
WBGene00013838	0.000143791	1.21574
WBGene00012750	0.00864652	1.21571
WBGene00003112	0.000572179	1.21524
WBGene00003956	6.31629e-06	1.21383
WBGene00007687	3.77187e-05	1.21368
WBGene00008142	0.0051917	1.21251
WBGene00077525	8.82848e-05	1.21133
WBGene00007228	0.000156406	1.21131
WBGene00015545	0.000147429	1.21123
WBGene00044770	0.000310822	1.21113
WBGene00003736	1.47113e-05	1.20957
WBGene00007366	0.00209669	1.20936
WBGene00009949	0.00283626	1.20809
WBGene00019074	1.77476e-05	1.2075
WBGene00004118	0.000569022	1.20704
WBGene00016355	5.56764e-05	1.20651
WBGene00008666	3.64347e-05	1.2064
WBGene00044681	0.00454514	1.20594
WBGene00020617	6.89706e-05	1.20542
WBGene00011524	4.2339e-05	1.2053
WBGene00194926	0.00267618	1.20522
WBGene00000672	0.000874284	1.20501
WBGene00010594	0.000980021	1.20491
WBGene00015356	1.2979e-05	1.2048
WBGene00017157	0.0033263	1.20297
WBGene00009061	0.00984711	1.20284
WBGene00020878	0.000485757	1.20274
WBGene00018861	0.00593629	1.20238
WBGene00013539	0.00164194	1.20144
WBGene00016506	0.00068745	1.20103
WBGene00015080	0.00229029	1.20048
WBGene00010128	1.0546e-05	1.20005
WBGene00009787	3.17545e-05	1.19946
WBGene00016172	1.9485e-05	1.19868
WBGene00022416	0.00629294	1.1986
WBGene00022073	0.000185977	1.19817
WBGene00018226	6.1545e-05	1.19695
WBGene00000972	0.00145924	1.19682
WBGene00008841	0.000125851	1.1962
WBGene00011727	0.000245138	1.19574
WBGene00017751	0.000295477	1.19556
WBGene00044772	0.00364168	1.1955
WBGene00021052	0.000280888	1.19465
WBGene00006441	0.000687916	1.19401
WBGene00017389	0.00323165	1.19337
WBGene00017309	0.0026637	1.19315
WBGene00022689	0.00287332	1.19291
WBGene00000681	0.00176097	1.19269
WBGene00194746	0.00807584	1.19211
WBGene00011069	0.00041948	1.19206
WBGene00015437	0.00306735	1.1917
WBGene00000485	0.000413718	1.19166
WBGene00018579	0.000141746	1.19115
WBGene00018874	0.000197058	1.19104
WBGene00019150	0.00065441	1.19039
WBGene00011926	0.00147638	1.18939
WBGene00020670	0.00059066	1.18788
WBGene00018430	0.000458117	1.18767
WBGene00007321	0.00221182	1.18683
WBGene00044698	8.38046e-05	1.18627
WBGene00018724	2.13604e-05	1.18567
WBGene00014000	1.98348e-05	1.18499
WBGene00016788	9.7014e-05	1.184
WBGene00000689	0.000105839	1.18382
WBGene00003573	0.000262183	1.18359
WBGene00013683	0.000165418	1.18332
WBGene00008559	0.000134735	1.18316
WBGene00001113	8.52088e-06	1.18272
WBGene00008092	0.000242648	1.18173
WBGene00006743	0.00311476	1.18075
WBGene00001535	0.00114061	1.18056
WBGene00000678	0.000481545	1.17931
WBGene00001204	0.00247252	1.1788
WBGene00000017	0.000198667	1.17803
WBGene00022727	0.000145527	1.17652
WBGene00001613	0.000537986	1.17652
WBGene00008760	0.000363314	1.17607
WBGene00018275	0.00080792	1.17605
WBGene00015510	0.00015402	1.17476
WBGene00008556	0.000339962	1.17394
WBGene00002252	7.55165e-05	1.1729
WBGene00017433	0.00277722	1.17252
WBGene00014198	0.00819114	1.17149
WBGene00005648	7.39097e-05	1.17127
WBGene00003633	0.000136875	1.17098
WBGene00019477	4.49345e-05	1.17091
WBGene00015231	0.00164648	1.17039
WBGene00018056	0.00234275	1.17004
WBGene00001077	7.82966e-06	1.16971
WBGene00010873	0.000264743	1.16957
WBGene00043534	0.000417339	1.16902
WBGene00007044	7.82266e-05	1.16816
WBGene00016865	0.00626271	1.16806
WBGene00007343	2.40352e-05	1.16805
WBGene00000412	0.00686992	1.16697
WBGene00010545	1.85902e-05	1.16544
WBGene00017033	0.00140833	1.165
WBGene00011345	0.000402839	1.1648
WBGene00016219	0.000411881	1.16435
WBGene00007506	9.58176e-05	1.1641
WBGene00018514	0.00148051	1.16405
WBGene00020921	1.2979e-05	1.16356
WBGene00013950	0.00107307	1.16247
WBGene00006717	0.00870169	1.16208
WBGene00007592	0.000141536	1.16204
WBGene00018311	0.000195129	1.16114
WBGene00008100	6.33254e-05	1.1611
WBGene00002269	0.000131726	1.1606
WBGene00011839	0.00028261	1.16049
WBGene00003933	2.89609e-05	1.15998
WBGene00017865	0.000211183	1.15977
WBGene00008513	0.00257017	1.15975
WBGene00005649	0.00385015	1.15975
WBGene00010262	4.06515e-05	1.15912
WBGene00015957	0.000459948	1.1591
WBGene00012585	4.33199e-05	1.15854
WBGene00003746	5.08348e-05	1.15847
WBGene00000858	0.000156253	1.15839
WBGene00018060	3.35392e-05	1.15806
WBGene00015824	0.000131678	1.15768
WBGene00016217	9.45267e-05	1.15715
WBGene00000955	0.000185977	1.15653
WBGene00009852	0.00588003	1.15612
WBGene00020800	0.0096356	1.15602
WBGene00001702	0.000610758	1.1556
WBGene00018958	9.47123e-05	1.15536
WBGene00012624	0.000107777	1.15511
WBGene00003544	0.000603856	1.15492
WBGene00018063	0.00257307	1.15378
WBGene00017381	9.04637e-05	1.15349
WBGene00009840	0.000564783	1.15305
WBGene00010558	0.000230287	1.15153
WBGene00017744	0.000285299	1.15099
WBGene00001636	9.72972e-05	1.15066
WBGene00016097	0.000789236	1.14935
WBGene00007903	0.000127376	1.14919
WBGene00008571	1.08887e-05	1.14848
WBGene00017039	0.0017785	1.14761
WBGene00023491	0.000171551	1.14754
WBGene00022487	0.00365962	1.14743
WBGene00001489	8.06165e-05	1.14678
WBGene00003909	0.00791674	1.14586
WBGene00007569	0.00586521	1.14581
WBGene00020270	0.00622593	1.14483
WBGene00016732	0.000406728	1.14458
WBGene00012404	0.00060324	1.14458
WBGene00044350	0.000595564	1.14454
WBGene00007807	6.17759e-06	1.14376
WBGene00000449	0.00173346	1.14329
WBGene00016906	1.79672e-05	1.14326
WBGene00010296	2.72618e-05	1.14308
WBGene00012322	0.000594485	1.14284
WBGene00016909	0.0040612	1.14265
WBGene00009971	1.21387e-05	1.14239
WBGene00007324	0.000147759	1.14228
WBGene00010931	0.000484921	1.14224
WBGene00019743	0.000246843	1.14205
WBGene00020283	0.000762763	1.13996
WBGene00013416	0.000193428	1.13941
WBGene00003856	0.00400202	1.13854
WBGene00022538	3.992e-05	1.13767
WBGene00020490	8.02019e-05	1.1376
WBGene00018505	0.00170176	1.13681
WBGene00020902	7.35229e-05	1.13598
WBGene00010468	2.48098e-05	1.13525
WBGene00019994	0.000460897	1.1345
WBGene00006063	3.33366e-05	1.13439
WBGene00003482	3.33582e-05	1.13334
WBGene00044468	4.28159e-05	1.13275
WBGene00007725	0.000367918	1.13245
WBGene00016417	0.00079162	1.13244
WBGene00007339	0.000145585	1.1319
WBGene00017692	0.00160833	1.13157
WBGene00018035	0.00023816	1.13071
WBGene00012005	8.1785e-06	1.12807
WBGene00017835	0.000201326	1.12782
WBGene00014153	0.0040916	1.12759
WBGene00011794	0.000152712	1.12731
WBGene00015948	0.00483593	1.12703
WBGene00005655	0.000185977	1.12675
WBGene00009647	0.00297207	1.12599
WBGene00008372	0.000142735	1.12406
WBGene00019184	5.15692e-05	1.12364
WBGene00005654	0.00371907	1.12363
WBGene00006983	0.000410584	1.1235
WBGene00012554	9.45944e-06	1.12338
WBGene00016396	0.00218678	1.12266
WBGene00008494	0.000729056	1.12125
WBGene00010524	8.99651e-05	1.12064
WBGene00015752	7.986e-06	1.12058
WBGene00018729	0.000604686	1.12008
WBGene00004055	9.21941e-05	1.11921
WBGene00009983	0.000829949	1.11787
WBGene00012352	5.65309e-05	1.11709
WBGene00003015	3.64347e-05	1.11642
WBGene00022242	0.0016971	1.11623
WBGene00016037	0.00202404	1.11585
WBGene00018062	0.000592297	1.11555
WBGene00021439	0.00050576	1.11546
WBGene00018732	7.90679e-05	1.11431
WBGene00001612	0.00106182	1.11389
WBGene00015805	0.000213262	1.11355
WBGene00022231	2.38443e-05	1.11321
WBGene00018061	0.000143528	1.11262
WBGene00021084	6.17515e-05	1.11254
WBGene00014065	0.00941942	1.11152
WBGene00016281	0.000818579	1.11133
WBGene00017041	7.83459e-05	1.1102
WBGene00009800	8.6657e-05	1.10995
WBGene00012139	7.07282e-05	1.10916
WBGene00020341	8.26965e-05	1.10901
WBGene00000020	0.000322049	1.1086
WBGene00004122	1.55287e-05	1.10846
WBGene00002273	5.41412e-05	1.10653
WBGene00013534	0.00107307	1.10576
WBGene00001171	0.00018975	1.10575
WBGene00019048	0.00193987	1.10421
WBGene00017417	5.08348e-05	1.10416
WBGene00007071	0.00061232	1.10156
WBGene00001490	5.40697e-05	1.10153
WBGene00018219	0.00469834	1.10149
WBGene00009818	3.84512e-05	1.10082
WBGene00002088	0.000318269	1.1007
WBGene00008542	3.70702e-05	1.10051
WBGene00007691	0.000226279	1.10035
WBGene00021448	3.3342e-05	1.10032
WBGene00021020	6.02367e-05	1.10019
WBGene00021791	0.000245126	1.1
WBGene00006747	0.000750152	1.09885
WBGene00007750	0.000197459	1.09845
WBGene00018976	0.000535155	1.09843
WBGene00012704	8.92254e-05	1.0978
WBGene00020148	0.0013266	1.09728
WBGene00007529	5.67814e-05	1.09682
WBGene00011960	0.00486198	1.0962
WBGene00016184	0.00225607	1.09588
WBGene00015085	0.00164366	1.09575
WBGene00012634	0.00465616	1.09455
WBGene00021039	0.000508695	1.09443
WBGene00022258	0.000253696	1.09435
WBGene00020018	0.000625293	1.09408
WBGene00007482	0.000199852	1.094
WBGene00019844	1.22474e-05	1.09323
WBGene00008849	0.00312325	1.09306
WBGene00001544	0.00425546	1.09246
WBGene00001543	0.000889067	1.09161
WBGene00022848	0.000435335	1.09113
WBGene00000832	6.02367e-05	1.09044
WBGene00014171	8.26684e-05	1.09023
WBGene00020788	4.83323e-05	1.08949
WBGene00020307	5.42953e-05	1.08937
WBGene00019741	0.00187158	1.08884
WBGene00003561	3.95654e-05	1.08754
WBGene00007203	0.00119719	1.08724
WBGene00010288	0.000343486	1.08715
WBGene00021089	0.000625819	1.0869
WBGene00014697	0.000314353	1.08686
WBGene00044569	0.00608215	1.08672
WBGene00009393	3.36411e-05	1.08566
WBGene00002243	0.000474437	1.08479
WBGene00006468	3.73434e-05	1.08396
WBGene00010790	0.000189074	1.08317
WBGene00044330	0.00163232	1.08179
WBGene00017976	0.00275096	1.08103
WBGene00016542	2.86332e-05	1.07908
WBGene00021503	1.21387e-05	1.07685
WBGene00017028	0.000144267	1.07682
WBGene00022649	0.000818579	1.07635
WBGene00013860	7.20209e-05	1.07551
WBGene00020006	0.000236387	1.07537
WBGene00021533	9.51348e-05	1.07504
WBGene00000929	3.88439e-05	1.07503
WBGene00007075	0.000343741	1.07484
WBGene00043988	0.000343741	1.07484
WBGene00020196	0.00883216	1.07478
WBGene00020222	8.57881e-05	1.07467
WBGene00015053	0.00245119	1.07451
WBGene00007073	2.39806e-05	1.07438
WBGene00019290	0.00466147	1.07435
WBGene00003885	0.00258032	1.07311
WBGene00022175	0.000212091	1.07241
WBGene00017463	5.13412e-05	1.07053
WBGene00019667	0.000917954	1.06939
WBGene00012099	0.00152125	1.06902
WBGene00009529	0.00537716	1.06846
WBGene00011383	9.93184e-05	1.06682
WBGene00016751	5.55252e-05	1.06666
WBGene00007139	6.7928e-05	1.06523
WBGene00019060	1.69011e-05	1.06485
WBGene00016883	0.00040112	1.06483
WBGene00020260	0.00247351	1.06482
WBGene00007752	4.54223e-05	1.06397
WBGene00016130	0.00064108	1.06275
WBGene00011112	1.90313e-05	1.06256
WBGene00015117	0.00149535	1.06231
WBGene00000302	0.000386466	1.0623
WBGene00018786	6.93735e-05	1.06141
WBGene00004457	3.09857e-05	1.06065
WBGene00013082	0.000521944	1.05972
WBGene00011768	2.13604e-05	1.05958
WBGene00018763	0.00250234	1.05911
WBGene00021980	0.00391754	1.0587
WBGene00005271	0.00491138	1.05855
WBGene00009326	0.00293778	1.05793
WBGene00011364	7.35229e-05	1.05774
WBGene00020740	0.00015178	1.05746
WBGene00007764	5.67814e-05	1.0562
WBGene00001646	0.00046154	1.05413
WBGene00003568	0.000139785	1.05386
WBGene00001119	0.000173047	1.05375
WBGene00018639	0.000538733	1.05204
WBGene00018402	0.00928877	1.0518
WBGene00003620	0.000181881	1.05169
WBGene00004259	5.69439e-05	1.05141
WBGene00015339	0.0024092	1.05054
WBGene00008570	0.000385373	1.05005
WBGene00011829	0.000163534	1.04989
WBGene00045063	0.00493075	1.04975
WBGene00000477	0.000488057	1.04857
WBGene00011286	0.00573646	1.04792
WBGene00005153	2.54173e-05	1.04678
WBGene00044068	7.83459e-05	1.04645
WBGene00008020	0.000314575	1.04641
[truncated: 1,254 more rows]
