# Supplementary material for: Pathogen infection and cholesterol deficiency activate the C. elegans p38 immune pathway through a TIR-1/SARM1 phase transition
Source: eLife. 2022 Jan 31;11:e74206. doi: 10.7554/eLife.74206 (PMC8923663; doi:10.7554/eLife.74206)
Supplement: Supplementary file 2. [file elife-74206-supp2.xlsx]

## Sheet: nhr-8(ok186)
Wormbase ID	qval	log2(nhr-8(ok186)/ wild-type uninfected)
WBGene00008097	0.000592681	6.45866
WBGene00007873	0.000316128	5.00896
WBGene00019421	0.00175272	4.94567
WBGene00017199	0.00246604	4.13636
WBGene00020700	0.0018649	3.70378
WBGene00045457	0.000131328	3.48007
WBGene00011384	0.00770298	3.44881
WBGene00001158	0.00281492	3.41709
WBGene00012682	0.00844365	3.34651
WBGene00021580	0.000592681	3.26786
WBGene00009710	0.00826863	3.26708
WBGene00006628	0.000408998	3.2379
WBGene00006627	0.00167063	3.12824
WBGene00044280	0.00099239	3.12764
WBGene00010062	0.000675502	3.02898
WBGene00009778	0.00254421	2.93694
WBGene00009914	0.00105342	2.93659
WBGene00019660	2.16085e-05	2.93602
WBGene00012027	0.00469513	2.91435
WBGene00008477	0.001003	2.87421
WBGene00008584	2.16085e-05	2.82231
WBGene00012467	0.00826863	2.73408
WBGene00022891	0.00027156	2.64905
WBGene00021517	0.00161374	2.62617
WBGene00014132	0.000675502	2.59196
WBGene00009835	0.00176477	2.50598
WBGene00011979	0.000545109	2.45386
WBGene00011672	0.000545109	2.41507
WBGene00008602	0.000118692	2.25971
WBGene00007097	7.30506e-05	2.22956
WBGene00010125	0.000104257	2.22584
WBGene00020760	0.00063756	2.14688
WBGene00000783	7.30506e-05	2.10214
WBGene00011801	0.000785645	2.06607
WBGene00018971	0.000288029	1.99655
WBGene00005657	0.00508596	1.96183
WBGene00013847	0.000492281	1.90154
WBGene00017839	0.00473196	1.83726
WBGene00012959	0.00649992	1.83682
WBGene00015932	0.000812098	1.82474
WBGene00008850	0.001003	1.81789
WBGene00003702	0.00215121	1.79914
WBGene00008486	0.000253512	1.76322
WBGene00003092	0.00246604	1.74959
WBGene00021178	0.00141926	1.71408
WBGene00008988	0.000592681	1.69258
WBGene00007875	7.30506e-05	1.67546
WBGene00009429	0.000243613	1.66262
WBGene00007833	0.000104257	1.63906
WBGene00017764	0.00105342	1.63508
WBGene00019146	0.00099239	1.61135
WBGene00001770	0.00113505	1.6029
WBGene00007440	0.00249113	1.58516
WBGene00011844	0.0018649	1.58477
WBGene00018630	0.0052926	1.56147
WBGene00021519	0.00868912	1.55437
WBGene00008220	0.000699384	1.55023
WBGene00000522	7.30506e-05	1.54357
WBGene00206354	0.00672979	1.49915
WBGene00009957	0.00198938	1.49798
WBGene00010899	0.000197341	1.48636
WBGene00021796	0.000592681	1.47594
WBGene00021083	0.000221449	1.4711
WBGene00000082	0.000316128	1.4606
WBGene00002274	0.000399468	1.4435
WBGene00006666	0.00402311	1.4308
WBGene00014136	0.000183791	1.42846
WBGene00017226	0.00757593	1.4123
WBGene00021518	7.30506e-05	1.41105
WBGene00044661	0.00797891	1.40064
WBGene00009641	0.000135777	1.39931
WBGene00011190	0.000828896	1.39779
WBGene00016164	0.00861094	1.35995
WBGene00012525	0.00899295	1.35004
WBGene00012961	0.000253512	1.34356
WBGene00011517	0.00129386	1.32732
WBGene00009397	0.000205521	1.29231
WBGene00019744	0.00180806	1.28765
WBGene00003689	0.0039127	1.28011
WBGene00001591	0.000947641	1.26953
WBGene00017151	0.00605817	1.25866
WBGene00020579	0.000118692	1.24471
WBGene00003091	0.000150561	1.24404
WBGene00007365	0.00198938	1.24076
WBGene00020972	0.00198938	1.21958
WBGene00013898	0.00257971	1.21228
WBGene00016845	0.00521931	1.18163
WBGene00000212	0.000323661	1.16681
WBGene00001506	0.00412488	1.1518
WBGene00016968	0.0039127	1.15107
WBGene00012583	0.00187084	1.14825
WBGene00019967	0.000808053	1.14119
WBGene00011800	0.00992745	1.13561
WBGene00007501	0.00127016	1.13135
WBGene00011330	0.00342995	1.12806
WBGene00013846	0.00844365	1.12079
WBGene00008199	0.000983262	1.11802
WBGene00017947	0.00336566	1.11717
WBGene00019212	0.00876855	1.1148
WBGene00017678	0.000129178	1.1143
WBGene00015362	0.00464817	1.10242
WBGene00010658	0.00249113	1.09514
WBGene00000399	0.00564382	1.07336
WBGene00019166	0.000301311	1.066
WBGene00044672	0.006719	1.0496
WBGene00044073	0.0041814	1.04953
WBGene00013559	0.00176477	1.0451
WBGene00009724	0.00902193	1.03954
WBGene00008449	0.000883112	1.01833
WBGene00017041	0.00240281	1.01509
WBGene00010124	0.00139665	1.01127
WBGene00017892	0.00198938	1.01089
WBGene00001577	0.00471214	1.01089
WBGene00008542	0.00137741	1.00801
WBGene00022816	0.00367375	1.00761
WBGene00011668	0.000736474	-1.02452
WBGene00004986	0.000719781	-1.03737
WBGene00012664	0.006719	-1.06088
WBGene00000111	0.00197812	-1.06613
WBGene00000722	0.00546517	-1.08992
WBGene00014057	0.00412488	-1.09184
WBGene00011076	0.00125599	-1.15964
WBGene00043980	0.00882715	-1.16507
WBGene00015052	0.000675502	-1.19856
WBGene00009877	0.00125599	-1.20315
WBGene00020182	0.000545109	-1.22245
WBGene00009526	0.00486052	-1.22618
WBGene00020516	0.000129178	-1.27141
WBGene00017691	0.00151861	-1.2886
WBGene00004989	0.00065606	-1.30234
WBGene00009237	0.000103064	-1.30527
WBGene00009146	0.00399707	-1.37135
WBGene00015050	0.000182826	-1.37532
WBGene00012251	0.000812098	-1.3827
WBGene00012253	0.00099239	-1.3895
WBGene00001397	0.00761748	-1.44475
WBGene00010969	0.00666223	-1.46639
WBGene00005002	0.00824001	-1.48002
WBGene00044679	0.00876855	-1.50778
WBGene00003093	0.000159004	-1.51041
WBGene00001399	0.00135913	-1.52791
WBGene00003095	0.00473196	-1.56135
WBGene00255598	0.00179203	-1.60397
WBGene00021337	0.00714161	-1.65145
WBGene00021335	0.00454855	-1.70043
WBGene00010499	0.00649992	-1.76431
WBGene00019105	0.000883112	-1.7714
WBGene00021160	4.53995e-05	-1.85521
WBGene00003607	0.000129178	-1.8699
WBGene00016660	0.0041814	-2.00134
WBGene00006520	0.000595389	-2.05579
WBGene00020989	0.000961159	-2.10547
WBGene00004000	4.53995e-05	-2.14486
WBGene00022642	0.000129178	-2.26941
WBGene00017019	0.00917367	-2.40493
WBGene00009487	0.00783726	-2.48008
WBGene00003543	0.00992574	-2.75281
WBGene00016361	0.00452534	-2.88988
WBGene00009644	0.00123775	-2.97995
WBGene00004242	2.16085e-05	-3.08449
WBGene00015848	0.00987708	-3.16254
WBGene00015913	3.73466e-06	-3.30163
WBGene00020439	0.00929011	-3.36702
WBGene00021145	0.00945521	-3.46736
WBGene00009890	0.00809049	-3.48607
WBGene00011277	0.00585308	-3.76996
