# Supplementary material for: Pathogen infection and cholesterol deficiency activate the C. elegans p38 immune pathway through a TIR-1/SARM1 phase transition
Source: eLife. 2022 Jan 31;11:e74206. doi: 10.7554/eLife.74206 (PMC8923663; doi:10.7554/eLife.74206)
Supplement: Supplementary file 3. [file elife-74206-supp3.xlsx]

## Sheet: 0 vs. 5 cholesterol
Wormbase ID	qval	log2(uninfected wild-type 0 μg/ml cholesterol / 5 μg/ml cholesterol)
WBGene00000614	0.0010716	8.21907
WBGene00000613	0.00108682	7.89307
WBGene00000627	4.22896e-05	7.78553
WBGene00000612	1.34223e-05	7.78028
WBGene00000617	4.86786e-05	7.7375
WBGene00000756	0.000664594	7.67249
WBGene00000660	1.5282e-05	7.65664
WBGene00000659	0.000852048	7.61645
WBGene00000593	2.19352e-05	7.5689
WBGene00001729	3.45811e-05	7.5445
WBGene00000628	0.0013996	7.51165
WBGene00000851	0.000196551	7.4303
WBGene00001734	7.14648e-06	7.39192
WBGene00000676	3.90924e-05	7.30703
WBGene00000731	8.44277e-05	7.2585
WBGene00000758	0.000689548	7.12267
WBGene00000688	0.000459815	6.95311
WBGene00001732	7.19294e-05	6.8973
WBGene00001718	2.45201e-06	6.80246
WBGene00000620	8.98134e-06	6.7509
WBGene00000737	0.000403788	6.7425
WBGene00006534	0.000540297	6.67586
WBGene00014173	7.26533e-07	6.48557
WBGene00044547	0.000389837	6.37951
WBGene00206512	3.12184e-05	6.10219
WBGene00000618	6.68521e-06	5.97396
WBGene00020239	4.4056e-05	5.88021
WBGene00044194	7.67163e-06	5.83683
WBGene00271815	5.20831e-06	5.83232
WBGene00008853	4.09504e-05	5.79723
WBGene00000621	2.92424e-06	5.79455
WBGene00002118	3.04932e-06	5.6872
WBGene00235311	1.19243e-05	5.58028
WBGene00086560	0.000960306	5.56475
WBGene00000648	4.74851e-05	5.47267
WBGene00011873	5.15746e-05	5.34179
WBGene00044201	0.000713762	5.33286
WBGene00009778	3.84861e-06	5.30916
WBGene00003473	7.48265e-05	5.29845
WBGene00001696	4.14033e-05	5.25247
WBGene00001728	7.38243e-05	5.24411
WBGene00022713	0.000116892	5.17108
WBGene00003529	9.54555e-06	5.16958
WBGene00195179	5.86494e-05	5.16596
WBGene00007989	0.000322831	5.16509
WBGene00020242	2.45585e-05	5.08373
WBGene00008891	1.40687e-06	5.0739
WBGene00015725	1.12314e-05	5.06793
WBGene00044589	1.85101e-05	5.03407
WBGene00000622	3.90349e-06	5.01728
WBGene00016845	2.99305e-06	4.99724
WBGene00189961	0.000258077	4.93317
WBGene00021964	4.10787e-06	4.92258
WBGene00001063	1.60764e-06	4.88183
WBGene00007682	1.56767e-05	4.85333
WBGene00011874	0.000230116	4.85008
WBGene00018295	6.86045e-05	4.79064
WBGene00001726	3.24089e-05	4.78529
WBGene00021449	2.51945e-05	4.77628
WBGene00021494	7.73623e-05	4.7746
WBGene00015342	0.00125565	4.77286
WBGene00008872	1.86708e-05	4.76135
WBGene00008908	1.87397e-05	4.75231
WBGene00007232	2.82406e-05	4.74237
WBGene00011508	0.000122081	4.7221
WBGene00044293	0.000109185	4.72161
WBGene00021961	2.40726e-05	4.71607
WBGene00015721	2.39462e-05	4.69908
WBGene00050906	2.06407e-05	4.653
WBGene00020241	0.000304305	4.6448
WBGene00017396	2.10937e-05	4.64282
WBGene00000015	7.29816e-05	4.61751
WBGene00001388	8.06004e-05	4.6052
WBGene00004176	2.08035e-05	4.58392
WBGene00044212	8.7997e-05	4.56642
WBGene00018601	2.49281e-05	4.5573
WBGene00019524	0.000100348	4.53275
WBGene00202498	2.87607e-05	4.51094
WBGene00020472	5.23143e-06	4.49471
WBGene00009303	0.000112142	4.46806
WBGene00001762	9.77606e-05	4.45021
WBGene00020700	2.09209e-05	4.4475
WBGene00000682	5.45755e-05	4.40533
WBGene00008396	6.04857e-05	4.40481
WBGene00044193	0.00197094	4.38445
WBGene00004177	4.03347e-05	4.37905
WBGene00020881	0.000886698	4.36889
WBGene00010399	0.000136865	4.34601
WBGene00011584	0.000136865	4.34601
WBGene00008797	0.0006595	4.33633
WBGene00000631	1.65708e-06	4.32437
WBGene00015338	0.000375371	4.30662
WBGene00021496	2.99305e-06	4.30465
WBGene00020882	0.000121811	4.30066
WBGene00271832	8.01729e-05	4.27429
WBGene00017695	5.70939e-05	4.2631
WBGene00017465	0.000186506	4.24779
WBGene00001693	0.00015863	4.22438
WBGene00020326	0.00082407	4.22395
WBGene00003522	9.9718e-06	4.22067
WBGene00004742	4.60289e-05	4.19865
WBGene00001387	4.52451e-06	4.19331
WBGene00000551	0.00722502	4.19113
WBGene00009990	4.91175e-05	4.18042
WBGene00021450	0.00118641	4.17792
WBGene00007876	0.000184017	4.17351
WBGene00016369	0.000151005	4.15508
WBGene00002103	6.43331e-05	4.14305
WBGene00019016	7.06852e-05	4.14175
WBGene00000736	6.78483e-05	4.13204
WBGene00016670	0.000478574	4.12891
WBGene00304201	0.000213242	4.12436
WBGene00077704	0.0006595	4.10029
WBGene00303398	0.000156045	4.09334
WBGene00013637	0.000271839	4.08202
WBGene00015722	0.000105478	4.0735
WBGene00044385	0.000149825	4.05765
WBGene00000697	1.84793e-05	4.05565
WBGene00017228	6.47124e-05	4.04603
WBGene00044658	5.30253e-05	4.04456
WBGene00018034	5.59449e-05	4.04246
WBGene00000665	6.97109e-07	4.03698
WBGene00001698	6.48597e-05	3.99243
WBGene00020561	5.05227e-07	3.96953
WBGene00007231	6.66582e-06	3.9509
WBGene00012783	7.41628e-06	3.9483
WBGene00013900	0.000177534	3.93135
WBGene00235317	7.01877e-05	3.92652
WBGene00016467	0.000249533	3.91425
WBGene00021072	0.000850362	3.90522
WBGene00019570	0.000387057	3.89178
WBGene00010062	8.05004e-06	3.83837
WBGene00044379	0.000426121	3.82238
WBGene00010216	0.000741498	3.81645
WBGene00012448	0.00059506	3.81061
WBGene00009423	0.00542459	3.80776
WBGene00002088	5.15973e-06	3.80647
WBGene00016052	4.20356e-06	3.80562
WBGene00044548	0.00143376	3.74175
WBGene00015720	0.000131037	3.74032
WBGene00008477	1.19778e-06	3.73856
WBGene00010528	0.000852307	3.68951
WBGene00007992	0.000338517	3.67539
WBGene00005833	0.000835681	3.67429
WBGene00014047	2.33493e-06	3.66745
WBGene00010005	0.00013393	3.65232
WBGene00019178	0.000218381	3.63948
WBGene00011698	0.000517678	3.63345
WBGene00010157	3.62718e-06	3.62383
WBGene00017501	3.90349e-06	3.6202
WBGene00001702	2.90458e-06	3.57709
WBGene00219324	0.000615261	3.56672
WBGene00018618	0.000419707	3.56152
WBGene00007765	2.45201e-06	3.55178
WBGene00011672	4.81587e-06	3.54872
WBGene00019331	0.000356881	3.54411
WBGene00007990	0.00491828	3.54145
WBGene00009908	0.000533522	3.53807
WBGene00010746	3.30644e-05	3.52749
WBGene00008059	0.000369288	3.52627
WBGene00013570	0.000369288	3.52627
WBGene00014045	0.000227965	3.52606
WBGene00020871	0.000591885	3.52459
WBGene00020870	0.00205584	3.51042
WBGene00003734	0.00137692	3.50285
WBGene00013961	0.000583428	3.49634
WBGene00008617	0.000197747	3.47228
WBGene00003099	0.00112024	3.4716
WBGene00000560	0.000163152	3.46528
WBGene00044058	0.000287881	3.45995
WBGene00013404	0.00047476	3.44613
WBGene00007873	0.00105253	3.43918
WBGene00020240	0.000105834	3.43569
WBGene00011427	0.00123918	3.42091
WBGene00001735	0.000782311	3.41813
WBGene00015593	0.000246795	3.40679
WBGene00019818	0.00113594	3.40212
WBGene00007872	0.00714151	3.37428
WBGene00021176	0.000111967	3.37243
WBGene00015700	0.00557257	3.36014
WBGene00010253	0.000632793	3.35293
WBGene00004236	6.28341e-05	3.28047
WBGene00017498	4.28712e-06	3.26657
WBGene00012025	0.000326004	3.26427
WBGene00000558	2.29681e-05	3.2198
WBGene00011894	2.44745e-05	3.20487
WBGene00015117	5.56961e-06	3.20136
WBGene00019908	4.5214e-05	3.19537
WBGene00016180	3.51272e-07	3.17845
WBGene00016484	0.000287268	3.16523
WBGene00008615	0.00376253	3.13807
WBGene00206478	0.000353513	3.137
WBGene00015886	0.00577268	3.12496
WBGene00017509	0.0023949	3.11988
WBGene00010124	4.78531e-07	3.11529
WBGene00005659	0.000726974	3.10126
WBGene00006097	0.000264757	3.09108
WBGene00007804	3.38489e-05	3.08762
WBGene00019527	4.50858e-05	3.08409
WBGene00017233	0.00139133	3.07845
WBGene00015708	8.7997e-05	3.07554
WBGene00018619	3.84861e-06	3.07078
WBGene00001820	6.04012e-06	3.0623
WBGene00019113	2.61985e-05	3.05786
WBGene00013646	0.00076734	3.053
WBGene00018643	0.000791035	3.05291
WBGene00002087	5.59804e-06	3.05095
WBGene00009608	0.000176005	3.05074
WBGene00007660	0.00039056	3.04851
WBGene00010614	0.000378381	3.03107
WBGene00000016	4.01069e-05	3.01816
WBGene00008602	9.96315e-05	3.01719
WBGene00009343	0.000507239	3.01359
WBGene00019306	5.22057e-05	3.01177
WBGene00021081	0.000543134	3.00741
WBGene00011833	8.09842e-07	3.0053
WBGene00017265	2.86996e-05	3.00506
WBGene00008616	0.000349397	2.99471
WBGene00011018	0.00040819	2.99019
WBGene00009856	0.000260338	2.98667
WBGene00016660	0.000715464	2.98226
WBGene00018645	5.07323e-06	2.98167
WBGene00007672	0.000951298	2.96433
WBGene00015600	0.00124199	2.96311
WBGene00015879	1.85274e-05	2.95791
WBGene00000749	5.77391e-06	2.95741
WBGene00005832	1.40363e-05	2.95417
WBGene00009963	0.000573119	2.95295
WBGene00005657	2.1892e-05	2.95078
WBGene00011676	2.99305e-06	2.94966
WBGene00018057	0.000622941	2.94744
WBGene00016281	5.73029e-05	2.93255
WBGene00185116	0.00293939	2.92491
WBGene00020691	0.000631684	2.92111
WBGene00009429	4.39557e-06	2.91738
WBGene00015605	0.000168059	2.91639
WBGene00011522	1.02245e-05	2.91588
WBGene00020016	0.000111215	2.91025
WBGene00008323	0.00112126	2.90825
WBGene00019234	7.4167e-06	2.901
WBGene00044014	0.000632159	2.89482
WBGene00012456	0.00161089	2.89303
WBGene00235114	0.00903081	2.88808
WBGene00044901	5.15582e-06	2.87869
WBGene00021731	8.43933e-06	2.86416
WBGene00001666	0.000785661	2.85715
WBGene00001712	0.00031337	2.85343
WBGene00020618	0.000132584	2.85141
WBGene00010754	0.00192492	2.84782
WBGene00006627	0.000581701	2.8477
WBGene00011948	4.99002e-06	2.84456
WBGene00044206	4.81587e-06	2.84396
WBGene00019179	0.000665952	2.83924
WBGene00017960	0.000659299	2.83233
WBGene00015660	7.15647e-07	2.83163
WBGene00011328	1.70653e-05	2.82712
WBGene00010032	5.56813e-05	2.81091
WBGene00020141	0.00040819	2.80695
WBGene00000673	4.86677e-06	2.80271
WBGene00013008	6.05939e-05	2.80012
WBGene00015045	0.00163803	2.79522
WBGene00017839	0.000591391	2.79493
WBGene00018971	6.97109e-07	2.79141
WBGene00018406	0.00231908	2.7904
WBGene00012518	0.00123664	2.78838
WBGene00270320	0.000324813	2.78639
WBGene00044783	0.00230902	2.78574
WBGene00016361	0.000565068	2.78389
WBGene00020880	0.0040629	2.77976
WBGene00001483	1.98392e-05	2.77927
WBGene00009859	0.000606287	2.77608
WBGene00017149	0.000119343	2.77511
WBGene00019970	0.00714151	2.77025
WBGene00012832	0.000378362	2.76802
WBGene00021582	0.000151096	2.76194
WBGene00016863	0.000557605	2.75546
WBGene00018209	0.00279307	2.75235
WBGene00011362	1.36538e-05	2.75071
WBGene00019146	3.09973e-05	2.73951
WBGene00013007	8.91962e-06	2.73754
WBGene00019968	0.000127451	2.73425
WBGene00017331	5.51395e-05	2.73185
WBGene00012921	0.000262135	2.72812
WBGene00006175	0.00147374	2.72711
WBGene00007638	0.000998775	2.72437
WBGene00012945	0.000998775	2.72437
WBGene00019314	0.000101494	2.72417
WBGene00016017	0.0013866	2.72359
WBGene00009061	0.000195337	2.72205
WBGene00003623	1.19778e-06	2.7219
WBGene00012269	0.00436136	2.71965
WBGene00021183	0.000930681	2.71567
WBGene00016417	7.23348e-06	2.71281
WBGene00021529	3.15003e-05	2.69737
WBGene00001068	5.52413e-06	2.6961
WBGene00189956	0.00201719	2.68655
WBGene00009033	0.00389964	2.68458
WBGene00001699	1.52024e-06	2.67711
WBGene00007929	9.74651e-06	2.67484
WBGene00008301	8.69371e-06	2.67201
WBGene00206461	0.00239834	2.65618
WBGene00021580	0.00238303	2.65455
WBGene00000905	1.41346e-06	2.65436
WBGene00010027	0.00218812	2.64586
WBGene00020587	0.000454596	2.64369
WBGene00000662	0.000146112	2.63886
WBGene00044376	0.00250602	2.63117
WBGene00001697	0.00120027	2.62988
WBGene00009863	0.00561081	2.62929
WBGene00016669	0.00132617	2.62882
WBGene00020703	1.1797e-05	2.62819
WBGene00018062	2.89796e-05	2.62478
WBGene00008632	0.0018151	2.62276
WBGene00021297	0.00279399	2.6213
WBGene00016894	6.50974e-07	2.62016
WBGene00008490	0.000148324	2.61877
WBGene00019931	4.89941e-05	2.61403
WBGene00000399	7.69635e-06	2.60756
WBGene00045207	0.000914002	2.60274
WBGene00016659	9.41249e-06	2.60079
WBGene00006163	0.00176609	2.59761
WBGene00015758	0.000180311	2.59433
WBGene00020080	0.000505857	2.58945
WBGene00013489	9.1368e-06	2.58561
WBGene00022816	5.05227e-07	2.58519
WBGene00008816	0.000949779	2.57657
WBGene00001543	5.0961e-05	2.56605
WBGene00014254	0.000976489	2.56083
WBGene00003769	2.45201e-06	2.5554
WBGene00009107	0.00564379	2.55315
WBGene00021517	0.000639051	2.55237
WBGene00009418	0.00133135	2.55061
WBGene00000677	1.58486e-05	2.55009
WBGene00015911	0.00119175	2.55007
WBGene00015706	1.24744e-05	2.53425
WBGene00012648	4.81587e-06	2.52665
WBGene00013060	0.00156707	2.52463
WBGene00011052	0.00264438	2.5228
WBGene00001760	1.51702e-05	2.52206
WBGene00015857	4.6406e-06	2.52155
WBGene00017484	0.00183709	2.5117
WBGene00019855	2.92424e-06	2.51093
WBGene00018696	1.48074e-05	2.50992
WBGene00001107	0.00587909	2.50468
WBGene00018646	0.000409936	2.50091
WBGene00194695	1.42966e-05	2.49876
WBGene00019508	0.00147634	2.49581
WBGene00022013	0.00637033	2.49225
WBGene00022479	0.00525309	2.48865
WBGene00009383	1.7659e-06	2.48788
WBGene00015046	6.97719e-06	2.4871
WBGene00017230	0.00621551	2.48665
WBGene00016109	0.00154434	2.48659
WBGene00012501	0.00251052	2.47867
WBGene00015993	0.000231744	2.47741
WBGene00000439	0.000352809	2.46744
WBGene00007233	0.000305198	2.46665
WBGene00007467	0.00172207	2.46124
WBGene00020232	0.0019049	2.46099
WBGene00021587	0.000320587	2.45792
WBGene00012028	0.00393464	2.4532
WBGene00010125	6.7187e-06	2.45303
WBGene00016483	4.83158e-05	2.45198
WBGene00012649	0.00267837	2.43269
WBGene00008647	0.00458163	2.43129
WBGene00138721	0.000125314	2.42977
WBGene00021491	0.00659106	2.42923
WBGene00009339	0.00453125	2.42848
WBGene00021121	2.98905e-05	2.42828
WBGene00003574	0.00261106	2.42644
WBGene00006632	0.00150957	2.42321
WBGene00008584	4.60494e-06	2.42274
WBGene00007469	0.00321714	2.42023
WBGene00019668	0.00524806	2.41485
WBGene00018345	0.00256093	2.41415
WBGene00003096	6.48311e-07	2.41179
WBGene00005703	0.000332166	2.40612
WBGene00015332	2.50769e-06	2.40157
WBGene00015076	1.0935e-05	2.40147
WBGene00011853	0.00187876	2.40081
WBGene00007867	2.90033e-06	2.38388
WBGene00003767	1.45382e-06	2.38158
WBGene00011095	2.74508e-06	2.37607
WBGene00017154	5.69333e-06	2.36074
WBGene00019388	0.000119537	2.3566
WBGene00269433	0.000139307	2.35606
WBGene00012750	0.000928506	2.35591
WBGene00015918	0.000116508	2.35502
WBGene00017755	0.00037521	2.35004
WBGene00195144	0.000805046	2.33963
WBGene00016295	0.00573626	2.33914
WBGene00018725	8.03251e-05	2.33731
WBGene00022550	0.000495596	2.33322
WBGene00011763	1.00026e-05	2.33166
WBGene00012023	0.00054536	2.33115
WBGene00022339	0.00571255	2.32663
WBGene00011042	6.82979e-05	2.31803
WBGene00015707	0.0014869	2.31203
WBGene00007163	0.00758849	2.30967
WBGene00004144	3.12693e-06	2.30648
WBGene00005654	0.000261089	2.3047
WBGene00022616	7.91317e-05	2.29699
WBGene00004335	0.00192275	2.29582
WBGene00018052	1.04383e-05	2.29558
WBGene00009986	0.00171316	2.29232
WBGene00010033	0.000368649	2.29007
WBGene00077521	5.17784e-06	2.28878
WBGene00000724	0.0031393	2.28874
WBGene00000870	1.56724e-06	2.28749
WBGene00008640	4.52308e-06	2.28543
WBGene00015139	9.72973e-05	2.28052
WBGene00021772	0.000223301	2.27356
WBGene00021236	5.05227e-07	2.27329
WBGene00007439	0.00471119	2.27155
WBGene00000272	0.000488775	2.26875
WBGene00000979	1.62196e-05	2.26834
WBGene00007482	3.21917e-06	2.26741
WBGene00019472	0.000123097	2.26596
WBGene00001715	0.000363152	2.26055
WBGene00015884	0.00164112	2.25824
WBGene00011004	0.00016514	2.25641
WBGene00008963	3.84861e-06	2.25379
WBGene00000017	6.24128e-06	2.25371
WBGene00019485	0.00255524	2.24952
WBGene00012757	0.00231247	2.24854
WBGene00022261	0.00252426	2.24765
WBGene00010931	9.9718e-06	2.24152
WBGene00206530	0.0001286	2.2386
WBGene00000742	6.45296e-05	2.23736
WBGene00018204	0.00317215	2.23201
WBGene00000739	7.01877e-05	2.23147
WBGene00009849	0.00209396	2.2296
WBGene00003605	2.10505e-05	2.22883
WBGene00012176	8.82761e-05	2.22669
WBGene00015268	2.66746e-05	2.22443
WBGene00017569	5.19992e-06	2.22247
WBGene00009895	1.60123e-05	2.21931
WBGene00018459	0.00874786	2.21757
WBGene00000853	2.87949e-05	2.21578
WBGene00021805	0.00952302	2.21495
WBGene00000402	9.00627e-07	2.21455
WBGene00003008	8.2474e-05	2.21156
WBGene00013950	9.01045e-05	2.20674
WBGene00012022	0.00932461	2.20259
WBGene00013079	1.07182e-05	2.20065
WBGene00007240	6.31884e-05	2.19994
WBGene00015042	0.00513775	2.19979
WBGene00010423	0.00246156	2.19703
WBGene00020613	0.00124958	2.19692
WBGene00009620	5.39795e-06	2.18838
WBGene00013673	2.33082e-06	2.18757
WBGene00011950	0.000906767	2.18717
WBGene00020062	0.00132818	2.18585
WBGene00011321	0.000641184	2.18288
WBGene00000903	3.62718e-06	2.1815
WBGene00016855	8.74894e-05	2.18065
WBGene00018219	0.000241995	2.17688
WBGene00050939	1.40331e-05	2.17464
WBGene00009311	1.04626e-06	2.16738
WBGene00008043	2.51018e-05	2.16648
WBGene00010411	0.000144313	2.16617
WBGene00009787	1.76845e-05	2.15848
WBGene00011838	4.66425e-06	2.15843
WBGene00020774	2.35195e-05	2.15811
WBGene00016677	2.1587e-05	2.15747
WBGene00019866	0.00135731	2.15732
WBGene00000606	6.80407e-06	2.1567
WBGene00018786	3.48858e-06	2.15076
WBGene00016996	9.21662e-06	2.15012
WBGene00007471	0.00689549	2.14972
WBGene00044043	0.000680371	2.14887
WBGene00045379	0.000436596	2.14208
WBGene00045411	0.000403938	2.14202
WBGene00268213	0.0010197	2.13762
WBGene00077439	0.000630915	2.13372
WBGene00009710	0.00302036	2.12803
WBGene00017490	1.24663e-06	2.1265
WBGene00017500	1.24663e-06	2.1265
WBGene00044536	0.00145627	2.12596
WBGene00010769	6.06165e-06	2.12168
WBGene00013481	7.54808e-06	2.12124
WBGene00000702	1.26398e-06	2.11826
WBGene00044367	0.00214476	2.11722
WBGene00001158	0.00255375	2.11481
WBGene00008712	1.06521e-05	2.11262
WBGene00012728	3.98983e-06	2.10979
WBGene00017390	0.00158785	2.10973
WBGene00000623	6.74543e-06	2.10949
WBGene00007946	0.000725242	2.10672
WBGene00016521	0.00703873	2.10487
WBGene00015679	0.00134966	2.10098
WBGene00016422	7.96364e-07	2.10046
WBGene00012261	1.38678e-06	2.09819
WBGene00017267	0.000714581	2.09694
WBGene00017270	0.000714581	2.09694
WBGene00003546	0.00053073	2.0923
WBGene00008905	0.000290381	2.09049
WBGene00002827	1.45179e-05	2.08921
WBGene00008292	0.000287459	2.08688
WBGene00016671	4.09222e-05	2.08475
WBGene00011074	9.65556e-05	2.08108
WBGene00012941	0.000135669	2.0791
WBGene00015040	0.000964519	2.07553
WBGene00015298	2.3138e-06	2.07442
WBGene00019549	0.00813698	2.07373
WBGene00004004	1.84424e-05	2.06932
WBGene00016063	0.00660863	2.06755
WBGene00021083	1.61215e-05	2.06389
WBGene00006620	2.01384e-05	2.06351
WBGene00016119	0.0018151	2.06309
WBGene00020878	3.91476e-05	2.06264
WBGene00003528	1.46645e-05	2.06012
WBGene00044461	0.00707779	2.05895
WBGene00003547	0.000213242	2.05891
WBGene00003551	0.000220286	2.0561
WBGene00009371	2.7626e-05	2.05587
WBGene00010453	2.53159e-06	2.05276
WBGene00014046	0.00221673	2.05181
WBGene00235133	0.00228901	2.05178
WBGene00010659	8.69668e-06	2.05058
WBGene00012186	3.68916e-06	2.04901
WBGene00269387	0.00646416	2.04805
WBGene00019212	1.39572e-06	2.04435
WBGene00009804	1.86332e-05	2.0437
WBGene00013753	0.00152352	2.0436
WBGene00003031	0.000119196	2.04317
WBGene00005893	0.00569747	2.03269
WBGene00020379	5.83899e-06	2.02729
WBGene00045481	0.00710652	2.02586
WBGene00017379	0.00473312	2.02452
WBGene00017668	0.00201371	2.02426
WBGene00008762	3.67976e-06	2.02341
WBGene00011844	2.57808e-05	2.02041
WBGene00009926	7.26533e-07	2.02035
WBGene00019652	0.00177696	2.0181
WBGene00000968	2.51916e-05	2.01725
WBGene00000053	0.00411103	2.01564
WBGene00010043	0.000827312	2.01303
WBGene00009773	2.48815e-05	2.01097
WBGene00017698	3.32622e-05	2.0097
WBGene00021862	0.00700723	2.00898
WBGene00001906	0.000163444	2.00531
WBGene00003092	0.000177648	2.0038
WBGene00012729	0.000581988	2.00304
WBGene00012256	6.65718e-07	1.9995
WBGene00014189	8.33495e-05	1.99941
WBGene00015435	0.000138853	1.99813
WBGene00015393	7.91317e-05	1.99751
WBGene00011188	0.00352081	1.99709
WBGene00011675	0.00556798	1.99552
WBGene00017764	7.0073e-05	1.99489
WBGene00077490	0.000110792	1.99448
WBGene00008625	0.00975703	1.99397
WBGene00007770	0.0028824	1.99392
WBGene00043297	0.00294686	1.9935
WBGene00003968	3.13654e-06	1.99005
WBGene00019782	0.000205103	1.9886
WBGene00007479	1.10221e-05	1.98518
WBGene00010775	0.008787	1.98406
WBGene00019265	0.00630996	1.98362
WBGene00004224	3.19672e-05	1.9833
WBGene00003714	0.00276208	1.97702
WBGene00011055	0.000107078	1.9743
WBGene00014009	0.000110921	1.97281
WBGene00013949	0.00196243	1.9699
WBGene00022639	0.00746186	1.96963
WBGene00015878	0.000573119	1.96782
WBGene00002282	1.40687e-06	1.96428
WBGene00008334	5.20073e-05	1.96339
WBGene00020833	0.000509871	1.95391
WBGene00020620	0.000841623	1.94858
WBGene00023501	0.000983979	1.94843
WBGene00021703	0.00378284	1.94763
WBGene00016283	4.71419e-06	1.93788
WBGene00003663	0.000344019	1.93589
WBGene00004811	0.000356116	1.93534
WBGene00021873	0.000426353	1.93293
WBGene00016628	4.6336e-05	1.9319
WBGene00013101	0.000223141	1.93052
WBGene00020063	0.00787682	1.927
WBGene00010202	0.0027658	1.92558
WBGene00012027	0.00482033	1.92458
WBGene00015841	1.79838e-06	1.92388
WBGene00011979	9.36567e-05	1.91979
WBGene00013899	4.63619e-06	1.91783
WBGene00012255	1.39572e-06	1.91412
WBGene00018997	0.000678151	1.91187
WBGene00003573	3.26638e-05	1.90879
WBGene00000920	1.69578e-05	1.90682
WBGene00219423	0.00426569	1.90402
WBGene00007367	0.00513736	1.90162
WBGene00006956	2.3138e-06	1.90098
WBGene00011417	8.93815e-05	1.89972
WBGene00011420	8.93815e-05	1.89972
WBGene00045457	7.1328e-05	1.89879
WBGene00018647	0.000156057	1.89537
WBGene00017060	0.000663796	1.89156
WBGene00018730	1.27339e-05	1.89141
WBGene00004134	7.96364e-07	1.88915
WBGene00021011	7.25629e-05	1.88428
WBGene00219410	0.0011697	1.88263
WBGene00008794	0.00490693	1.8819
WBGene00044350	9.22972e-05	1.88151
WBGene00006366	1.78929e-06	1.88035
WBGene00004092	4.22788e-05	1.87541
WBGene00012628	1.50476e-05	1.87251
WBGene00008279	0.00910609	1.87096
WBGene00004275	0.00568906	1.86897
WBGene00018288	0.000752219	1.86763
WBGene00012635	7.08179e-06	1.86678
WBGene00022024	5.32478e-06	1.86547
WBGene00016481	3.35868e-05	1.86462
WBGene00020501	0.000372207	1.86407
WBGene00018694	1.83615e-05	1.86294
WBGene00001824	3.15125e-06	1.86288
WBGene00006966	0.00409624	1.86263
WBGene00018547	1.43365e-05	1.86022
WBGene00007247	0.00336568	1.85957
WBGene00000624	0.000186393	1.85742
WBGene00006629	0.00114503	1.85723
WBGene00009803	5.30253e-05	1.85689
WBGene00004393	0.000773203	1.85582
WBGene00001065	4.47419e-05	1.85331
WBGene00019101	0.000756875	1.85188
WBGene00013609	0.000586633	1.85115
WBGene00019945	0.00619195	1.85033
WBGene00008176	1.34705e-05	1.84426
WBGene00007321	0.000145498	1.84223
WBGene00045460	0.0080245	1.8407
WBGene00007465	0.00359679	1.83898
WBGene00011424	0.00152895	1.83602
WBGene00002116	0.000102855	1.834
WBGene00018056	3.91476e-05	1.83341
WBGene00014037	0.00592986	1.83258
WBGene00017200	0.00106736	1.82964
WBGene00020465	2.1112e-05	1.82922
WBGene00001768	1.36933e-05	1.82767
WBGene00009835	0.000793193	1.82524
WBGene00000744	0.00849322	1.82457
WBGene00012175	0.00695937	1.8234
WBGene00009077	0.0092111	1.82322
WBGene00011762	2.8184e-05	1.82189
WBGene00011744	8.98409e-05	1.8206
WBGene00010742	4.20566e-06	1.81962
WBGene00011926	0.000302635	1.81954
WBGene00000928	3.38705e-06	1.81867
WBGene00194708	0.000292014	1.81706
WBGene00021583	5.15582e-06	1.81594
WBGene00008739	4.13653e-06	1.81395
WBGene00009255	0.00998608	1.81241
WBGene00001772	4.44942e-05	1.81021
WBGene00011307	7.36479e-06	1.80907
WBGene00001432	4.86786e-05	1.80902
WBGene00302993	1.21177e-05	1.8048
WBGene00000521	5.17088e-05	1.80337
WBGene00020049	5.38688e-05	1.80287
WBGene00194869	0.00715123	1.8026
WBGene00206525	0.00554902	1.79864
WBGene00016645	0.000307736	1.7978
WBGene00194898	0.00641744	1.796
WBGene00003681	2.99305e-06	1.7952
WBGene00001064	6.10774e-06	1.79514
WBGene00015805	3.57565e-05	1.79436
WBGene00009094	1.88496e-06	1.79056
WBGene00015781	2.99305e-06	1.79034
WBGene00020720	0.00026721	1.78989
WBGene00015523	6.05512e-05	1.7897
WBGene00015829	0.00710801	1.78626
WBGene00008879	0.00285214	1.78507
WBGene00013516	0.00010765	1.7828
WBGene00010321	6.31992e-06	1.78225
WBGene00000557	1.85101e-05	1.7813
WBGene00009964	5.95547e-05	1.78057
WBGene00001072	1.82983e-05	1.77985
WBGene00018744	1.24957e-06	1.77973
WBGene00015044	0.00163803	1.77873
WBGene00003544	7.58784e-05	1.77706
WBGene00015647	4.52451e-06	1.77397
WBGene00013130	4.43857e-05	1.77153
WBGene00011285	6.86287e-05	1.7699
WBGene00050934	0.00155449	1.76853
WBGene00019232	1.16093e-05	1.76509
WBGene00189995	0.00794475	1.76495
WBGene00016927	0.000424965	1.76485
WBGene00018732	5.08511e-05	1.76368
WBGene00015759	6.99518e-06	1.76263
WBGene00001500	0.000210629	1.76167
WBGene00007397	0.00010358	1.76001
WBGene00018743	5.70465e-06	1.75806
WBGene00001069	1.45382e-06	1.75737
WBGene00020609	3.1142e-05	1.75576
WBGene00018311	8.52258e-05	1.75563
WBGene00007833	1.09715e-05	1.75546
WBGene00045096	0.00118677	1.75538
WBGene00001071	1.84793e-05	1.75493
WBGene00044617	0.00248511	1.75428
WBGene00013485	6.0043e-05	1.75422
WBGene00010835	6.31058e-06	1.75193
WBGene00019751	9.49004e-06	1.75061
WBGene00013058	0.00014726	1.74808
WBGene00010790	6.41202e-06	1.74106
WBGene00007241	0.0049367	1.74056
WBGene00044534	0.00234311	1.74026
WBGene00045401	0.00117396	1.73954
WBGene00021087	0.000182419	1.73927
WBGene00009108	0.00209412	1.73673
WBGene00021915	0.000158516	1.73547
WBGene00206464	0.000305475	1.73217
WBGene00022146	8.57819e-06	1.73136
WBGene00009586	0.000566233	1.72975
WBGene00002051	0.000909814	1.72924
WBGene00006622	0.000578467	1.72916
WBGene00018005	0.000698675	1.72656
WBGene00003862	0.00544565	1.72552
WBGene00004119	6.80407e-06	1.71827
WBGene00019318	7.30612e-06	1.71758
WBGene00003112	2.70035e-05	1.71671
WBGene00013180	1.33155e-05	1.71509
WBGene00021976	0.00735013	1.71484
WBGene00007894	0.000234944	1.71289
WBGene00018418	2.53159e-06	1.71158
WBGene00020083	2.00735e-05	1.71126
WBGene00005655	4.188e-06	1.71114
WBGene00001070	1.04783e-05	1.70694
WBGene00008628	1.17458e-05	1.7067
WBGene00011286	4.1983e-05	1.70635
WBGene00015602	0.00420416	1.70619
WBGene00005644	0.000115978	1.70223
WBGene00011817	0.000118427	1.69942
WBGene00019268	5.15582e-06	1.69586
WBGene00009805	0.00687411	1.69441
WBGene00009724	1.15792e-05	1.69425
WBGene00021492	0.00315408	1.69409
WBGene00011107	2.55542e-06	1.69148
WBGene00007174	1.03966e-05	1.69002
WBGene00015692	5.53402e-06	1.68891
WBGene00016355	1.2048e-05	1.68798
WBGene00009653	4.66425e-06	1.68664
WBGene00018211	0.000162461	1.68659
WBGene00012257	2.19322e-06	1.68531
WBGene00009541	0.00504566	1.68468
WBGene00022274	8.57408e-05	1.6834
WBGene00013458	2.98544e-06	1.68327
WBGene00003703	0.000673612	1.68291
WBGene00007490	0.00433639	1.68254
WBGene00013975	0.00145059	1.68121
WBGene00007203	0.000156057	1.68058
WBGene00008978	0.000136145	1.67826
WBGene00012688	0.000788169	1.67563
WBGene00013825	0.00897391	1.67516
WBGene00015882	0.000168059	1.66999
WBGene00015795	1.4748e-05	1.66932
WBGene00012398	0.000292249	1.6689
WBGene00021526	0.00291857	1.66885
WBGene00023500	4.29373e-06	1.66874
WBGene00013215	8.98409e-05	1.66767
WBGene00015395	0.00124261	1.66643
WBGene00012939	6.31723e-06	1.66412
WBGene00018755	1.37382e-05	1.6639
WBGene00008021	0.000961266	1.66319
WBGene00019293	0.00116842	1.66284
WBGene00017157	0.000813519	1.66089
WBGene00000246	9.18543e-06	1.6588
WBGene00018803	1.0424e-05	1.65875
WBGene00009692	0.00163395	1.65824
WBGene00018042	0.00373955	1.65684
WBGene00021412	5.22711e-05	1.65642
WBGene00011254	0.000368548	1.65546
WBGene00020368	6.47227e-05	1.65455
WBGene00002246	0.000270318	1.6533
WBGene00013499	1.9147e-05	1.65328
WBGene00021084	1.98012e-06	1.65287
WBGene00013897	0.000945814	1.65157
WBGene00008027	5.13705e-05	1.64958
WBGene00001591	2.17762e-05	1.64504
WBGene00017231	0.00256089	1.64408
WBGene00007460	1.19694e-05	1.64241
WBGene00164973	0.000153044	1.64033
WBGene00044495	0.00272683	1.63946
WBGene00016657	1.51702e-05	1.63788
WBGene00000990	3.57474e-05	1.6376
WBGene00003664	0.000136868	1.63727
WBGene00021339	0.00161948	1.63686
WBGene00022040	0.000718463	1.63673
WBGene00017840	4.12173e-05	1.63587
WBGene00018731	6.81836e-06	1.63504
WBGene00235158	0.000537397	1.63133
WBGene00001481	2.75316e-05	1.63003
WBGene00000908	5.17784e-06	1.62858
WBGene00194916	0.00285574	1.6271
WBGene00017315	0.001422	1.62652
WBGene00000242	0.00725997	1.62551
WBGene00008841	2.90697e-06	1.62533
WBGene00003474	0.000279443	1.62332
WBGene00016407	2.3138e-06	1.62264
WBGene00006965	4.37925e-05	1.62241
WBGene00014793	6.26766e-05	1.61762
WBGene00008033	2.69472e-05	1.61699
WBGene00019994	6.39607e-06	1.61636
WBGene00016349	0.00472792	1.61235
WBGene00007440	4.18014e-05	1.60785
WBGene00007938	1.39572e-06	1.60776
WBGene00001397	5.4972e-06	1.60295
WBGene00012396	0.000170445	1.60235
WBGene00010251	5.83443e-05	1.60184
WBGene00015067	4.03749e-05	1.60004
WBGene00022440	0.00992255	1.59985
WBGene00010738	3.03659e-06	1.59944
WBGene00009826	0.00525891	1.597
WBGene00006539	1.44737e-05	1.59674
WBGene00005653	0.000641526	1.59536
WBGene00007375	0.000147552	1.59465
WBGene00007183	0.00225888	1.59426
WBGene00000056	0.00186046	1.59413
WBGene00022517	7.34444e-05	1.59281
WBGene00012317	8.17872e-06	1.59159
WBGene00011977	1.24619e-05	1.58796
WBGene00004764	1.64353e-05	1.5867
WBGene00010722	1.74166e-05	1.58294
WBGene00009789	0.000126661	1.58222
WBGene00007366	0.000710594	1.5822
WBGene00006666	5.48488e-05	1.58017
WBGene00012118	4.81587e-06	1.57565
WBGene00044280	4.01034e-05	1.57503
WBGene00022103	1.85057e-05	1.57493
WBGene00235164	0.00257908	1.5749
WBGene00012107	0.000398291	1.57382
WBGene00011624	0.000174638	1.57326
WBGene00020869	5.73737e-06	1.57323
WBGene00011070	1.33357e-05	1.57306
WBGene00012185	4.76453e-06	1.57153
WBGene00019520	2.3138e-06	1.57
WBGene00000907	0.000838802	1.56886
WBGene00019029	0.000895601	1.56862
WBGene00015790	1.83915e-05	1.56799
WBGene00011162	0.000204494	1.56644
WBGene00007552	7.16842e-06	1.5663
WBGene00009839	0.00169887	1.56621
WBGene00015260	0.00376995	1.56521
WBGene00007818	0.000290924	1.56488
WBGene00020156	1.09353e-05	1.56448
WBGene00006424	8.73815e-05	1.56253
WBGene00019426	6.57255e-05	1.56192
WBGene00008850	0.00077662	1.56151
WBGene00014006	9.50314e-06	1.56064
WBGene00020737	0.0081126	1.56015
WBGene00018303	3.16228e-06	1.55728
WBGene00003408	1.17023e-05	1.55679
WBGene00008971	0.000471734	1.55425
WBGene00017421	0.000138853	1.55218
WBGene00004157	0.00120027	1.55047
WBGene00016093	0.000289202	1.5486
WBGene00022033	0.000160195	1.54858
WBGene00018576	1.10396e-05	1.54724
WBGene00022611	3.57474e-05	1.5462
WBGene00016419	2.97981e-06	1.54562
WBGene00020704	0.000112394	1.54479
WBGene00010525	3.89648e-05	1.54462
WBGene00018430	0.00070145	1.54147
WBGene00011673	0.00089107	1.53925
WBGene00003168	0.00120491	1.53913
WBGene00008290	0.000684424	1.53907
WBGene00001400	0.000409499	1.53891
WBGene00020566	6.3632e-05	1.53793
WBGene00021963	1.04783e-05	1.53454
WBGene00007951	0.000347074	1.53439
WBGene00050875	7.89785e-05	1.53411
WBGene00019285	3.02611e-06	1.53302
WBGene00016424	6.68151e-05	1.52841
WBGene00010864	0.00278262	1.52786
WBGene00003553	2.3138e-06	1.52649
WBGene00021235	1.37949e-05	1.525
WBGene00010589	0.00285219	1.52492
WBGene00007919	0.000352757	1.52201
WBGene00013820	0.00225	1.51907
WBGene00010936	9.484e-05	1.51747
WBGene00018708	1.16343e-05	1.51744
WBGene00020143	3.23364e-05	1.5154
WBGene00009854	0.000345535	1.51405
WBGene00008010	6.98537e-05	1.51396
WBGene00017535	3.28546e-05	1.51366
WBGene00012152	0.000122106	1.5102
WBGene00018566	1.32767e-05	1.50968
WBGene00044138	0.00479001	1.50958
WBGene00004229	7.59838e-05	1.50793
WBGene00006544	0.00114699	1.50721
WBGene00015019	0.00140193	1.50639
WBGene00016403	0.00431422	1.50453
WBGene00000882	1.63275e-06	1.50397
WBGene00016012	0.00424427	1.50378
WBGene00001163	2.81213e-06	1.50377
WBGene00007723	0.00872672	1.50319
WBGene00017340	3.54366e-06	1.5027
WBGene00015402	0.000341958	1.50191
WBGene00003915	0.000140512	1.5015
WBGene00044796	0.000299997	1.50138
WBGene00206522	0.00125992	1.49935
WBGene00023414	0.000715442	1.49838
WBGene00000729	5.60587e-05	1.4983
WBGene00020741	9.0866e-05	1.49815
WBGene00015259	0.00187022	1.49737
WBGene00013898	1.5334e-05	1.49623
WBGene00017133	0.00519941	1.49322
WBGene00020194	3.7312e-06	1.49197
WBGene00018353	0.000217332	1.49191
WBGene00010068	0.000406209	1.49137
WBGene00044074	0.000608335	1.49038
WBGene00001159	6.96534e-06	1.48918
WBGene00020879	0.00463494	1.48913
WBGene00008180	3.87593e-05	1.48833
WBGene00013492	0.00040979	1.48795
WBGene00044313	0.00602755	1.4872
WBGene00015225	0.00948569	1.48567
WBGene00008335	0.000281364	1.48542
WBGene00006970	2.35282e-05	1.48312
WBGene00000457	0.00233279	1.48212
WBGene00006948	9.28069e-05	1.48151
WBGene00044772	0.00162602	1.48134
WBGene00020573	0.0098409	1.48099
WBGene00009375	0.000350172	1.48058
WBGene00000599	0.000206915	1.4791
WBGene00044331	0.00752525	1.47803
WBGene00005101	0.0045437	1.47683
WBGene00019198	7.47699e-05	1.47571
WBGene00018063	0.00282217	1.47429
WBGene00020697	0.00755322	1.47259
WBGene00009889	2.01116e-05	1.47107
WBGene00009087	0.000292297	1.47082
WBGene00022445	0.000486722	1.4696
WBGene00044661	0.00207536	1.46941
WBGene00008763	0.000128319	1.46838
WBGene00009014	0.00358372	1.46834
WBGene00012585	2.92424e-06	1.46744
WBGene00020817	0.00277459	1.46723
WBGene00011644	0.00374356	1.46671
WBGene00000241	0.00156754	1.4663
WBGene00011251	0.000782311	1.46546
WBGene00019550	3.3129e-05	1.46533
WBGene00045246	6.61199e-05	1.46391
WBGene00017991	1.67195e-05	1.46345
WBGene00017483	4.2576e-06	1.46343
WBGene00018741	2.33014e-05	1.4633
WBGene00013322	0.00287494	1.46292
WBGene00023491	2.56677e-05	1.46141
WBGene00000220	6.72627e-06	1.46111
WBGene00185095	0.00341966	1.46087
WBGene00016700	0.000577546	1.45616
WBGene00000714	0.000222562	1.45614
WBGene00008807	0.000363152	1.45543
WBGene00000111	6.52921e-05	1.45453
WBGene00001133	0.00106075	1.45307
WBGene00011572	0.000707796	1.45298
WBGene00020025	2.12824e-05	1.45292
WBGene00021403	1.56551e-05	1.45233
WBGene00021407	1.56551e-05	1.45233
WBGene00006310	8.75446e-06	1.45228
WBGene00016683	0.000701596	1.45226
WBGene00001707	6.9467e-06	1.45182
WBGene00018041	0.000261502	1.44991
WBGene00020887	0.00027144	1.44862
WBGene00003591	7.28637e-05	1.44654
WBGene00018761	0.00502487	1.44556
WBGene00013515	6.10774e-06	1.44553
WBGene00043049	0.00176394	1.44345
WBGene00000784	4.99002e-06	1.44333
WBGene00009395	7.36776e-05	1.44182
WBGene00021157	0.000612649	1.44113
WBGene00018414	0.00280142	1.43909
WBGene00003001	1.18249e-05	1.43901
WBGene00017510	0.00718369	1.43799
WBGene00021917	0.000310976	1.4366
WBGene00021404	0.00324632	1.43643
WBGene00021408	0.00324632	1.43643
WBGene00009522	0.00791969	1.43641
WBGene00007264	6.59925e-06	1.43609
WBGene00011345	0.000105917	1.43584
WBGene00016532	0.00510028	1.43561
WBGene00004222	5.20831e-06	1.43495
WBGene00002270	0.00505295	1.43346
WBGene00006418	0.000518946	1.43125
WBGene00000412	0.00167394	1.43077
WBGene00006628	0.00471122	1.43056
WBGene00013169	0.000492053	1.43046
WBGene00018760	0.00185351	1.42741
WBGene00009988	0.0014473	1.42515
WBGene00010258	0.00364636	1.42384
WBGene00001078	6.21561e-05	1.42049
WBGene00001434	0.00580675	1.42042
WBGene00004257	1.95885e-05	1.41981
WBGene00020743	6.57255e-05	1.41897
WBGene00008605	5.23143e-06	1.41794
WBGene00019597	8.657e-05	1.4176
WBGene00003995	3.71483e-06	1.41646
WBGene00003731	1.05976e-05	1.41637
WBGene00021245	0.00893243	1.41571
WBGene00005131	0.00172091	1.4145
WBGene00022591	9.36549e-05	1.41395
WBGene00017463	1.29267e-05	1.41389
WBGene00012826	0.00139097	1.41143
WBGene00001210	0.000596926	1.41116
WBGene00009323	2.39462e-05	1.4103
WBGene00044631	0.0017016	1.40872
WBGene00019979	2.05958e-05	1.40773
WBGene00017660	0.00585791	1.40747
WBGene00020855	3.30644e-05	1.40672
WBGene00020386	1.93969e-05	1.4064
WBGene00001898	9.44026e-05	1.40574
WBGene00016097	0.000149364	1.40545
WBGene00020626	1.361e-05	1.40504
WBGene00015053	0.000211172	1.40373
WBGene00015980	0.000176099	1.40365
WBGene00000717	0.000111605	1.40355
WBGene00017711	0.000176893	1.40266
WBGene00017184	8.91103e-06	1.4013
WBGene00020329	0.00150957	1.40059
WBGene00000058	0.00205689	1.40036
WBGene00001477	0.00404375	1.39959
WBGene00001789	0.00196474	1.39946
WBGene00008075	0.00547742	1.39912
WBGene00045208	0.000170278	1.39653
WBGene00021086	0.000565445	1.39589
WBGene00010365	0.00272614	1.39445
WBGene00303024	0.000308827	1.39287
WBGene00020487	0.000891996	1.39037
WBGene00006782	0.00449018	1.38982
WBGene00003606	7.82667e-05	1.38972
WBGene00018055	0.00101809	1.38953
WBGene00007131	0.00634652	1.38882
WBGene00001253	2.14098e-05	1.38762
WBGene00017247	3.06989e-05	1.38671
WBGene00020550	3.57474e-05	1.38659
WBGene00021101	0.00565591	1.38363
WBGene00016454	3.19461e-05	1.38315
WBGene00003965	0.000466995	1.38267
WBGene00001556	0.00769917	1.38183
WBGene00000415	0.000249657	1.38152
WBGene00016094	0.000488775	1.37989
WBGene00017751	4.37413e-05	1.37801
WBGene00018215	2.92424e-06	1.37791
WBGene00017127	6.58922e-05	1.37694
WBGene00007994	0.00129297	1.37451
WBGene00014175	0.000495596	1.37342
WBGene00017420	3.32622e-05	1.37321
WBGene00003237	0.0028195	1.37296
WBGene00007881	0.000147864	1.37242
WBGene00021745	0.00137229	1.37206
WBGene00011548	3.77998e-06	1.3719
WBGene00016805	5.69333e-06	1.36996
WBGene00010262	1.15792e-05	1.36732
WBGene00000038	0.00554532	1.36725
WBGene00007219	3.20118e-05	1.36703
WBGene00008434	0.00174028	1.36655
WBGene00002233	0.000114805	1.36252
WBGene00011798	0.00268048	1.36213
WBGene00011839	0.00235949	1.36208
WBGene00014184	0.000182448	1.36198
WBGene00302974	1.30388e-05	1.36169
WBGene00000969	2.94213e-05	1.35852
WBGene00003969	0.00229057	1.35636
WBGene00007900	0.000510417	1.35612
WBGene00017364	5.89052e-05	1.35601
WBGene00011003	0.00214039	1.35561
WBGene00044698	9.66937e-06	1.3544
WBGene00044082	4.65855e-05	1.35435
WBGene00000963	9.08911e-06	1.35389
WBGene00009325	0.000418102	1.35365
WBGene00013104	1.86905e-05	1.35333
WBGene00015408	0.000539932	1.35268
WBGene00021178	0.000416265	1.35192
WBGene00012170	0.00263921	1.35093
WBGene00008861	0.000135385	1.35004
WBGene00003534	7.03823e-06	1.34999
WBGene00012545	2.86996e-05	1.34869
WBGene00019143	0.000432091	1.3475
WBGene00000503	4.43857e-05	1.34712
WBGene00006807	0.00093834	1.34543
WBGene00003746	1.25227e-05	1.34474
WBGene00007142	9.38809e-05	1.34438
WBGene00004397	2.52776e-05	1.34407
WBGene00021446	7.91317e-05	1.3429
WBGene00020157	0.00374317	1.34205
WBGene00009896	5.30064e-05	1.34096
WBGene00022569	2.05958e-05	1.34074
WBGene00008897	0.000293532	1.33972
WBGene00018590	4.86814e-05	1.3394
WBGene00016329	2.91997e-05	1.33865
WBGene00001439	5.70853e-06	1.33788
WBGene00015171	0.00042855	1.33773
WBGene00220261	5.09358e-05	1.3373
WBGene00012364	5.39795e-06	1.33729
WBGene00010674	0.000397647	1.33723
WBGene00004219	2.80272e-06	1.33587
WBGene00020130	0.000710594	1.33562
WBGene00020702	1.81918e-05	1.33502
WBGene00013607	0.00845077	1.33434
WBGene00015718	0.00305163	1.3336
WBGene00003847	2.33082e-06	1.33108
WBGene00015631	0.000438546	1.3308
WBGene00018468	5.33339e-05	1.33025
WBGene00020617	0.000197585	1.32964
WBGene00003167	0.00706159	1.32956
WBGene00015396	0.00408412	1.32915
WBGene00001751	0.00527534	1.32863
WBGene00012381	0.000171225	1.32851
WBGene00235110	0.00545951	1.32725
WBGene00010940	0.000102059	1.32625
WBGene00010898	0.00591957	1.3252
WBGene00009229	0.000424965	1.32429
WBGene00017309	0.000818262	1.32419
WBGene00012391	0.00274013	1.32347
WBGene00000061	0.00865121	1.32328
WBGene00003071	2.91951e-05	1.32326
WBGene00016840	0.000679016	1.323
WBGene00235268	1.06121e-05	1.32192
WBGene00008142	0.000666765	1.3218
WBGene00010001	6.43331e-05	1.32099
WBGene00011768	2.14755e-05	1.31989
WBGene00008392	0.000944637	1.31947
WBGene00002248	4.26977e-05	1.31936
WBGene00015135	0.00016537	1.31882
WBGene00219208	5.01209e-05	1.31806
WBGene00019476	6.17634e-05	1.31783
WBGene00020616	7.63654e-05	1.31762
WBGene00044725	0.00999352	1.31747
WBGene00017865	0.000136117	1.31576
WBGene00001557	0.00313962	1.31559
WBGene00017018	7.30612e-06	1.315
WBGene00016505	0.000161556	1.31447
WBGene00021085	1.91647e-06	1.31363
WBGene00015474	0.000585401	1.31336
WBGene00018707	0.0012342	1.31254
WBGene00008894	0.000292488	1.312
WBGene00044414	0.0013425	1.31168
WBGene00003530	2.97125e-06	1.31162
WBGene00004210	3.95052e-06	1.31118
WBGene00018939	0.000995653	1.31112
WBGene00003614	6.70751e-05	1.31034
WBGene00008519	0.00726217	1.30984
WBGene00021931	1.60468e-05	1.30901
WBGene00013884	7.14524e-05	1.30866
WBGene00001464	0.000178211	1.30842
WBGene00000482	2.42685e-05	1.30808
WBGene00014200	0.00611303	1.3074
WBGene00006363	8.1533e-05	1.30666
WBGene00018738	2.65013e-05	1.30665
WBGene00007213	0.00301775	1.30568
WBGene00006852	0.000162357	1.30176
WBGene00006743	0.00413756	1.30017
WBGene00017296	0.00660972	1.2995
WBGene00018602	0.000401372	1.29811
WBGene00016748	0.00861998	1.29794
WBGene00011878	0.00306592	1.29781
WBGene00012046	0.000717549	1.2972
WBGene00001391	0.000116875	1.29637
WBGene00007141	0.000956536	1.29591
WBGene00019021	3.08474e-05	1.29482
WBGene00016596	1.9215e-05	1.29462
WBGene00012632	0.000461942	1.29288
WBGene00001079	1.38895e-05	1.29143
WBGene00009891	0.0045502	1.29113
WBGene00018175	0.00116436	1.29079
WBGene00003702	0.000468823	1.29033
WBGene00002393	9.53126e-05	1.2902
WBGene00019960	5.1379e-06	1.28951
WBGene00001059	8.73967e-06	1.28944
WBGene00000523	0.00436293	1.28852
WBGene00007452	0.00917722	1.28784
WBGene00004998	2.58183e-05	1.28656
WBGene00021948	5.43698e-06	1.28549
WBGene00007405	0.000113774	1.28549
WBGene00004227	1.17866e-05	1.28387
WBGene00009750	7.57027e-05	1.28194
WBGene00011453	0.0075261	1.28167
WBGene00019404	0.000332369	1.28106
WBGene00008858	0.00536823	1.281
WBGene00016474	2.64999e-05	1.28049
WBGene00008492	5.85974e-06	1.27836
WBGene00020712	0.00430656	1.27793
WBGene00020811	9.90033e-06	1.27589
WBGene00015560	0.000844384	1.27534
WBGene00006947	4.00861e-06	1.27303
WBGene00009490	0.00370535	1.27259
WBGene00016319	5.09358e-05	1.27194
WBGene00011546	0.0020282	1.26973
WBGene00000395	3.02948e-05	1.26943
WBGene00020317	0.000547302	1.26933
WBGene00017471	1.34405e-05	1.26911
WBGene00008988	0.00198246	1.26874
WBGene00009722	3.03032e-05	1.26791
WBGene00018039	6.23453e-05	1.26781
WBGene00004173	1.29977e-05	1.26694
WBGene00003888	0.000118924	1.26541
WBGene00021435	0.00735793	1.26539
WBGene00006685	9.92117e-05	1.26529
WBGene00017464	8.19867e-05	1.2652
WBGene00011154	0.000190034	1.26345
WBGene00018069	0.00207787	1.26258
WBGene00017577	7.08305e-05	1.26167
WBGene00009791	0.000646148	1.26109
WBGene00010684	0.00423619	1.26061
WBGene00219216	3.45811e-05	1.25914
WBGene00008509	0.000350805	1.25881
WBGene00003143	0.000885601	1.25827
WBGene00015442	0.00143331	1.25818
WBGene00022245	2.3138e-06	1.25812
WBGene00020612	2.51412e-05	1.25752
WBGene00020250	0.000627657	1.25659
WBGene00018720	0.00212172	1.25479
WBGene00017664	0.00329699	1.25352
WBGene00011495	0.000130056	1.25303
WBGene00008583	2.17733e-05	1.25178
WBGene00008495	5.12723e-06	1.24972
WBGene00044811	0.00133447	1.24949
WBGene00016136	0.000464519	1.24824
WBGene00001953	0.000274168	1.24687
WBGene00008987	2.89796e-05	1.24522
WBGene00018702	2.18777e-05	1.2437
WBGene00016107	0.00558328	1.2431
WBGene00019837	0.000175037	1.2417
WBGene00012947	0.00124326	1.24154
WBGene00018466	0.000289912	1.23988
WBGene00015258	0.000155558	1.23782
WBGene00021337	0.000826009	1.23767
WBGene00022231	7.23348e-06	1.23742
WBGene00017363	0.00961559	1.23686
WBGene00011262	5.60899e-05	1.23634
WBGene00016945	0.00571645	1.23629
WBGene00000992	7.55844e-06	1.23625
WBGene00011956	0.000858268	1.23562
WBGene00000039	4.8319e-06	1.23448
WBGene00008579	0.00029025	1.23397
WBGene00004006	5.46322e-05	1.23248
WBGene00009842	0.000263213	1.23184
WBGene00001389	0.000115678	1.23095
WBGene00006682	0.000424965	1.23053
WBGene00009158	1.96586e-05	1.23007
WBGene00011121	0.0087383	1.23001
WBGene00020043	0.00636845	1.22891
WBGene00002987	0.00547371	1.22772
WBGene00018706	8.70862e-06	1.22736
WBGene00019486	0.000412861	1.22642
WBGene00020740	1.85101e-05	1.22615
WBGene00011899	3.5497e-05	1.22551
WBGene00003885	0.00137356	1.22526
WBGene00018268	8.00063e-05	1.22409
WBGene00022612	6.45296e-05	1.22242
WBGene00001377	0.0012613	1.22178
WBGene00235330	0.000649436	1.22132
WBGene00003554	5.34309e-06	1.2201
WBGene00007177	0.000201325	1.21994
WBGene00009261	2.34868e-05	1.21966
WBGene00006441	0.00131054	1.21822
WBGene00009819	0.00605263	1.21801
WBGene00008929	2.47947e-05	1.21772
WBGene00303081	2.45507e-05	1.21765
WBGene00008549	7.34733e-06	1.21736
WBGene00017716	5.70853e-06	1.21735
WBGene00004264	1.80814e-05	1.21692
WBGene00007253	0.00652207	1.21667
WBGene00008032	4.16733e-06	1.21627
WBGene00000478	0.000461218	1.21574
WBGene00009512	0.000535693	1.21549
WBGene00003523	3.87593e-05	1.21503
WBGene00021152	0.00778036	1.21491
WBGene00019092	2.2162e-05	1.21482
WBGene00015464	4.00155e-06	1.21422
WBGene00017226	0.00497063	1.21414
WBGene00009466	0.00573548	1.21369
WBGene00009503	0.000440005	1.21217
WBGene00020714	0.00547353	1.21211
WBGene00044330	5.93965e-05	1.21143
WBGene00004172	7.61615e-06	1.21111
WBGene00016785	0.00564112	1.2103
WBGene00001207	0.000921942	1.20913
WBGene00001854	6.58403e-05	1.20865
WBGene00011190	0.000875807	1.20859
WBGene00003387	0.000541551	1.20833
WBGene00009340	1.79794e-05	1.20723
WBGene00013438	0.000826179	1.20707
WBGene00003653	0.00013515	1.20655
WBGene00003768	7.08179e-06	1.20645
WBGene00001252	0.00672465	1.20538
WBGene00019187	0.00128375	1.20367
WBGene00021980	0.00184695	1.20315
WBGene00017959	0.00229787	1.20232
WBGene00017762	0.000239547	1.20135
WBGene00011238	0.00269107	1.20126
WBGene00008100	0.000700469	1.20076
WBGene00044029	5.46107e-05	1.20076
WBGene00007553	0.00013475	1.19965
WBGene00001730	5.56024e-06	1.19945
WBGene00022073	3.28546e-05	1.19837
WBGene00016504	0.00512135	1.19763
WBGene00010031	0.00374016	1.19724
WBGene00010322	0.00347265	1.19682
WBGene00000526	0.000293053	1.19679
WBGene00017255	0.00392646	1.19676
WBGene00012604	0.000103834	1.19673
WBGene00013329	0.00287481	1.19511
WBGene00004013	1.21177e-05	1.19493
WBGene00004932	0.000329678	1.19422
WBGene00016613	0.00156816	1.19419
WBGene00017745	8.28979e-05	1.19412
WBGene00019904	0.000540152	1.19337
WBGene00006464	0.000738649	1.19288
WBGene00001451	4.83237e-05	1.19179
WBGene00017937	6.23472e-05	1.19083
WBGene00045248	0.00805594	1.19066
WBGene00007925	9.90033e-06	1.19051
WBGene00000062	0.000741549	1.19048
WBGene00000679	0.000360011	1.19
WBGene00023416	0.00119829	1.18942
WBGene00008589	0.000909814	1.18873
WBGene00007875	1.6086e-05	1.18872
WBGene00013588	0.000465279	1.18813
WBGene00013418	0.000115818	1.18728
WBGene00020760	0.000850362	1.18709
WBGene00022154	0.000364886	1.18655
WBGene00018607	0.000303404	1.18591
WBGene00018758	1.23573e-05	1.18508
WBGene00006869	4.01034e-05	1.18379
WBGene00009984	0.000269528	1.18365
WBGene00020532	0.00338554	1.18364
WBGene00017260	0.00420039	1.18341
WBGene00012629	0.00177997	1.18194
WBGene00007365	0.00108331	1.18046
WBGene00012439	2.4382e-05	1.1804
WBGene00008914	0.000138793	1.18014
WBGene00014099	0.00104202	1.17967
WBGene00001987	0.00401038	1.17961
WBGene00007317	0.000290924	1.17961
WBGene00006766	0.000612593	1.17958
WBGene00013802	0.00399626	1.17918
WBGene00003756	5.2801e-05	1.17835
WBGene00015227	0.00093129	1.177
WBGene00003717	0.00824315	1.17648
WBGene00001692	0.000632159	1.17645
WBGene00195176	0.00115096	1.17632
WBGene00006367	1.60825e-05	1.17562
WBGene00020231	0.00668467	1.17387
WBGene00002019	0.00367959	1.17162
WBGene00002020	0.00367959	1.17162
WBGene00003550	0.00431054	1.17133
WBGene00010019	0.00136066	1.17089
WBGene00007071	8.35173e-06	1.16932
WBGene00077693	7.48518e-06	1.16931
WBGene00044411	0.00314745	1.16845
WBGene00003657	0.00127737	1.16622
WBGene00013585	3.37877e-05	1.16592
WBGene00006690	0.00028769	1.16496
WBGene00003017	0.000513713	1.16474
WBGene00010982	0.00092331	1.16472
WBGene00009315	0.000172663	1.16461
WBGene00044623	4.01608e-06	1.16357
WBGene00018965	1.62705e-05	1.16244
WBGene00003909	0.00302036	1.16208
WBGene00000902	7.31904e-05	1.16095
WBGene00001570	3.62509e-06	1.15961
WBGene00022242	0.000220409	1.1583
WBGene00003033	0.000231574	1.15812
WBGene00008234	0.00389532	1.15801
WBGene00000914	2.46373e-05	1.15721
WBGene00017970	7.20743e-06	1.15628
WBGene00003165	0.000172807	1.15465
WBGene00018375	0.000350817	1.15417
WBGene00007353	5.3744e-05	1.15367
WBGene00010506	0.00720241	1.15328
WBGene00012540	8.4392e-05	1.15323
WBGene00002113	6.2258e-05	1.15268
WBGene00019148	0.000100485	1.15203
WBGene00004827	0.000372326	1.15177
WBGene00019329	0.000157166	1.15167
WBGene00269434	0.000615261	1.15111
WBGene00001456	2.01116e-05	1.15074
WBGene00019772	1.41399e-05	1.15057
WBGene00004102	0.00375485	1.15026
WBGene00000783	1.6662e-05	1.14965
WBGene00016463	0.00140203	1.14964
WBGene00017128	9.57389e-05	1.14925
WBGene00008999	3.4175e-06	1.148
WBGene00002110	3.44928e-05	1.14778
WBGene00003111	9.56395e-05	1.14773
WBGene00003100	0.000187836	1.14609
WBGene00001184	1.40331e-05	1.14571
WBGene00003569	0.000698428	1.14551
WBGene00012222	2.87569e-05	1.14515
WBGene00019180	1.489e-05	1.14385
WBGene00010335	0.000441363	1.14383
WBGene00011829	0.000232831	1.14346
WBGene00007153	3.77417e-05	1.14241
WBGene00016064	0.000164351	1.14194
WBGene00020911	2.18985e-05	1.14151
WBGene00012282	0.00457312	1.14133
WBGene00045340	0.00513775	1.14059
WBGene00002039	3.34428e-06	1.13844
WBGene00016932	0.00141137	1.13785
WBGene00020777	0.00419916	1.13751
WBGene00022538	1.92557e-05	1.13738
WBGene00012813	4.84685e-06	1.13675
WBGene00010747	0.000539233	1.13646
WBGene00020611	0.000677935	1.1364
WBGene00011891	3.23719e-06	1.13622
WBGene00018535	0.00636242	1.13605
WBGene00004950	0.000110483	1.13601
WBGene00007214	9.36549e-05	1.13598
WBGene00018060	1.16412e-05	1.13572
WBGene00021080	0.000419856	1.13544
WBGene00194905	0.00536126	1.13524
WBGene00015510	7.07048e-06	1.13493
WBGene00021158	0.000802152	1.13491
WBGene00015158	0.00306347	1.13409
WBGene00013484	0.00309457	1.13359
WBGene00008607	4.76453e-06	1.13355
WBGene00021913	0.00502851	1.13353
WBGene00007486	7.53318e-05	1.13343
WBGene00001172	1.311e-05	1.13256
WBGene00021247	3.73514e-05	1.13204
WBGene00043994	0.000565445	1.1315
WBGene00018269	6.28035e-05	1.1314
WBGene00001962	0.00760886	1.13114
WBGene00015977	0.00787683	1.13104
WBGene00001724	4.68718e-06	1.13101
WBGene00044294	5.60404e-05	1.13086
WBGene00017071	1.18518e-05	1.12978
WBGene00003889	0.00938563	1.12825
WBGene00007835	0.00709807	1.1277
WBGene00015496	0.000156564	1.12732
WBGene00011725	0.00081886	1.12668
WBGene00020648	0.00537532	1.12627
WBGene00019368	0.00448342	1.12626
WBGene00000288	0.000292098	1.12552
WBGene00018133	0.000422939	1.12478
WBGene00000463	0.000270841	1.12436
WBGene00001719	2.50542e-05	1.124
WBGene00006748	0.00198981	1.12279
WBGene00020307	0.000105146	1.12249
WBGene00015574	0.00114174	1.12212
WBGene00001462	3.07774e-05	1.12209
WBGene00016324	0.00684007	1.12176
WBGene00020341	1.9329e-05	1.12047
WBGene00008820	6.01905e-05	1.12022
WBGene00012404	0.000245235	1.11983
WBGene00018472	0.00132153	1.11943
WBGene00003015	8.69668e-06	1.11874
WBGene00003750	0.000148204	1.11703
WBGene00018354	0.00263848	1.11676
WBGene00045250	0.00106489	1.1163
WBGene00016221	0.00139543	1.1161
WBGene00001988	0.00454431	1.11594
WBGene00044530	4.17414e-05	1.1157
WBGene00003482	4.81587e-06	1.11556
WBGene00008593	0.000436849	1.11336
WBGene00010243	0.0073887	1.11331
WBGene00004221	0.000143256	1.11231
WBGene00007053	9.04229e-06	1.11184
WBGene00013312	0.00163628	1.11078
WBGene00001636	0.000119973	1.11072
WBGene00006949	0.0020927	1.11065
WBGene00009958	3.78464e-05	1.10948
WBGene00005078	0.000169657	1.10905
WBGene00007988	0.000303296	1.10897
WBGene00270319	0.000936513	1.10813
WBGene00009624	6.18052e-05	1.10778
WBGene00022063	0.000202113	1.10701
WBGene00004854	5.52673e-05	1.10658
WBGene00006818	0.000349323	1.10637
WBGene00020069	0.00288414	1.10604
WBGene00014101	0.00117359	1.10533
WBGene00017201	0.000520895	1.10502
WBGene00008045	0.00507498	1.10464
WBGene00003998	0.00028746	1.10438
WBGene00019592	0.00131252	1.10435
WBGene00005641	0.000947068	1.1042
WBGene00001457	0.000116425	1.10409
WBGene00022845	0.00163803	1.10386
WBGene00044630	0.000656982	1.10356
WBGene00010972	0.000192771	1.10333
WBGene00017789	2.67258e-05	1.10331
WBGene00000452	0.0021368	1.10293
WBGene00000972	0.00615655	1.10284
WBGene00017307	5.60404e-05	1.10141
WBGene00017983	0.00134983	1.10133
WBGene00010706	0.00202037	1.10132
WBGene00011326	0.000107316	1.10116
WBGene00007055	2.00735e-05	1.1004
WBGene00008840	0.00129297	1.09999
WBGene00014052	9.22863e-05	1.09981
WBGene00015433	4.60308e-05	1.09979
WBGene00017560	8.00421e-05	1.09967
WBGene00012491	0.00023698	1.09938
WBGene00007560	1.58411e-05	1.09896
WBGene00009408	0.000438329	1.09894
WBGene00219373	0.000433381	1.09843
WBGene00008760	0.000230116	1.09761
WBGene00021415	8.5204e-06	1.09672
WBGene00012861	0.000389837	1.09649
WBGene00009406	0.0051818	1.09639
WBGene00006459	0.00410268	1.09629
WBGene00010520	0.00536311	1.09543
WBGene00022131	9.96315e-05	1.09529
WBGene00022893	0.00012374	1.09425
WBGene00000553	3.44465e-05	1.09418
WBGene00119203	0.00152102	1.09403
WBGene00011167	0.00108701	1.09385
WBGene00009848	0.000277328	1.09361
WBGene00021372	0.000248196	1.09358
WBGene00016028	9.96315e-05	1.09319
WBGene00018217	9.36567e-05	1.09201
WBGene00022283	7.63215e-06	1.09196
WBGene00009857	0.00546699	1.09156
WBGene00017659	6.18406e-05	1.09087
WBGene00016069	0.00242391	1.09064
WBGene00022104	0.000507845	1.08853
WBGene00018061	3.2972e-05	1.08828
WBGene00001366	7.40065e-05	1.08784
WBGene00045474	0.00200221	1.0876
WBGene00009855	0.00803581	1.08656
WBGene00011382	0.000329678	1.0864
WBGene00011575	0.000146564	1.08554
WBGene00004773	1.14435e-05	1.08445
WBGene00019128	0.00150027	1.08382
WBGene00022657	0.00339852	1.08337
WBGene00012322	0.000202496	1.08331
WBGene00175031	0.00461643	1.08324
WBGene00015354	1.24048e-05	1.08297
WBGene00001458	1.32767e-05	1.08173
WBGene00017594	0.000426825	1.08054
WBGene00044403	0.0035726	1.07961
WBGene00016429	0.00135335	1.07881
WBGene00014136	3.76864e-05	1.07877
WBGene00003765	9.90033e-06	1.07854
WBGene00044389	0.00291644	1.07785
WBGene00001976	8.53361e-05	1.07713
WBGene00018157	0.00555465	1.07657
WBGene00008483	0.000370443	1.0756
WBGene00012533	0.000293585	1.07507
WBGene00044068	6.61715e-05	1.07408
WBGene00007511	0.00530541	1.07309
WBGene00019547	0.000442518	1.07264
WBGene00012444	2.61985e-05	1.07186
WBGene00001687	0.000309642	1.07172
WBGene00017416	0.000169089	1.07132
WBGene00013159	0.00183602	1.07074
WBGene00004398	0.000318163	1.0699
WBGene00018878	0.00011165	1.06973
WBGene00008522	0.000758122	1.06957
WBGene00009367	0.000126642	1.06914
WBGene00011683	7.29816e-05	1.06893
WBGene00000691	0.00272351	1.06882
WBGene00018571	0.00476099	1.06879
WBGene00009799	0.000308166	1.06859
WBGene00019944	0.00012806	1.06796
WBGene00006747	2.70793e-05	1.0672
WBGene00022592	5.46385e-05	1.06715
WBGene00004911	4.68762e-05	1.06713
WBGene00015620	0.000126428	1.06619
WBGene00003707	0.00148125	1.06487
WBGene00016906	1.261e-05	1.06487
WBGene00006331	8.36441e-05	1.06314
WBGene00018640	1.45862e-05	1.06268
WBGene00009227	0.00903086	1.06248
WBGene00008681	0.00151814	1.062
WBGene00009529	0.00966026	1.06196
WBGene00000743	0.00120027	1.06175
WBGene00021379	0.00264678	1.05968
WBGene00004265	0.00222607	1.05953
WBGene00020451	0.000828762	1.05927
WBGene00001461	4.02062e-05	1.05903
WBGene00007898	0.000260338	1.05819
WBGene00020725	1.57547e-05	1.05783
WBGene00001615	9.42516e-05	1.05766
WBGene00003752	0.000111045	1.05708
WBGene00003939	0.000945814	1.05708
WBGene00016364	0.00815515	1.0561
WBGene00019859	0.00036791	1.05593
WBGene00021039	6.54677e-05	1.05579
WBGene00011471	0.00999647	1.0554
WBGene00206355	0.00892956	1.055
WBGene00009647	0.00150457	1.05483
WBGene00012583	1.58411e-05	1.05362
WBGene00009226	0.00013393	1.05313
WBGene00021451	0.00731007	1.05266
WBGene00010744	5.93891e-05	1.05246
WBGene00013166	0.00301775	1.05168
WBGene00010236	0.000170844	1.04874
WBGene00020215	0.000166924	1.0486
WBGene00003689	0.0014276	1.0483
WBGene00020360	9.56131e-05	1.04789
WBGene00001045	3.94734e-05	1.04785
WBGene00015948	0.00566953	1.04769
WBGene00003091	1.60727e-05	1.04751
WBGene00022577	0.00143214	1.045
WBGene00003640	0.000131046	1.04468
WBGene00020363	0.00214976	1.04428
WBGene00013853	8.48953e-05	1.04317
WBGene00017468	0.000576542	1.04269
WBGene00000901	7.02523e-06	1.04253
WBGene00003368	4.83237e-05	1.04239
WBGene00012704	0.000131228	1.04189
WBGene00022415	3.676e-05	1.04099
WBGene00013119	0.0079109	1.04063
WBGene00018260	0.00271658	1.04041
WBGene00008421	0.00242739	1.03993
WBGene00020007	1.2757e-05	1.03991
WBGene00017637	0.00125083	1.03957
WBGene00007487	0.000816584	1.03908
WBGene00008693	0.00502418	1.03882
WBGene00020335	1.83241e-05	1.0386
WBGene00185014	7.73623e-05	1.03829
WBGene00021095	1.02327e-05	1.03827
WBGene00013882	2.00735e-05	1.03765
WBGene00018788	0.000157437	1.0364
WBGene00013970	0.000109747	1.03606
WBGene00017692	0.000805519	1.03536
WBGene00011708	8.7997e-05	1.03518
WBGene00003618	8.59674e-05	1.0349
WBGene00008735	1.58073e-05	1.0343
WBGene00015285	0.000164718	1.03386
WBGene00007827	0.000587563	1.03353
WBGene00001814	6.05326e-06	1.03282
WBGene00015753	0.000100596	1.03246
WBGene00020559	0.00106959	1.0324
WBGene00008443	5.63146e-05	1.03126
WBGene00006662	0.000198337	1.03071
WBGene00015824	9.24078e-05	1.03054
WBGene00010673	2.01116e-05	1.02974
WBGene00017961	0.00139397	1.02872
WBGene00007191	0.00136614	1.02805
WBGene00015476	8.1533e-05	1.0278
WBGene00044004	0.000239464	1.02682
WBGene00045336	0.00705726	1.02588
WBGene00016976	0.00511732	1.02522
WBGene00007286	0.00802469	1.02381
WBGene00018112	0.00368772	1.02248
WBGene00016920	0.00010082	1.02232
WBGene00006431	0.000387798	1.02179
WBGene00011002	0.00700677	1.02159
WBGene00020319	0.00436186	1.02154
WBGene00019873	0.00157351	1.02075
WBGene00012137	0.00973281	1.02008
WBGene00020854	9.8399e-05	1.01971
WBGene00016396	0.000159089	1.0196
WBGene00017126	2.82406e-05	1.0196
WBGene00284849	0.00416682	1.01905
WBGene00004225	1.84493e-05	1.01797
WBGene00007736	6.86045e-05	1.01778
WBGene00011831	7.73841e-06	1.01686
WBGene00019764	0.00442964	1.01672
WBGene00003687	3.56301e-05	1.01662
WBGene00007604	2.32103e-05	1.0162
WBGene00018737	7.26026e-06	1.01593
WBGene00022106	0.00803057	1.0159
WBGene00009800	4.48237e-05	1.0158
WBGene00020436	0.00025351	1.01523
WBGene00003247	4.93963e-06	1.01462
WBGene00018543	0.00469215	1.01383
WBGene00000610	0.000899622	1.01373
WBGene00017653	0.00208251	1.01254
WBGene00000069	0.00132001	1.01225
WBGene00012032	7.94933e-06	1.01172
WBGene00015921	0.00615717	1.01148
WBGene00009523	0.0045607	1.01107
WBGene00003633	5.78415e-05	1.01087
WBGene00020224	0.00373955	1.01023
WBGene00012634	0.000426579	1.01009
WBGene00006873	0.00679086	1.01008
WBGene00011850	0.000131026	1.00956
WBGene00018191	0.00466326	1.00928
WBGene00003741	0.000510902	1.00896
WBGene00001577	0.000492447	1.00873
WBGene00008449	5.73923e-06	1.00865
WBGene00019870	0.00798415	1.00821
WBGene00020450	0.00431175	1.00809
WBGene00014182	8.99546e-05	1.00809
WBGene00014188	8.99546e-05	1.00809
WBGene00044024	0.00366178	1.00798
WBGene00009716	0.00586434	1.00774
WBGene00000449	0.00348588	1.00746
WBGene00016987	0.000188828	1.00744
WBGene00003675	0.000417003	1.00725
WBGene00015518	0.000152572	1.00688
WBGene00017530	0.000156564	1.00632
WBGene00009904	0.000433735	1.00624
WBGene00006306	0.000123664	1.00608
WBGene00303015	7.31305e-05	1.0055
WBGene00022682	0.00187352	1.0053
WBGene00015286	0.000296921	1.00502
WBGene00009953	0.000241167	1.00411
WBGene00011228	0.00482233	1.00411
WBGene00004140	1.02327e-05	1.0028
WBGene00009700	0.00169315	1.00275
WBGene00004822	0.00113646	1.00247
WBGene00020901	0.00208812	1.00166
WBGene00019355	0.00259158	1.00131
WBGene00006561	0.000109006	1.00127
WBGene00044009	0.00486385	1.00114
WBGene00008985	0.00105207	1.00056
WBGene00013965	1.40331e-05	1.00049
WBGene00002252	0.000409932	1.0003
WBGene00015288	0.00301554	1.00008
WBGene00019348	0.00117997	1.00004
WBGene00010485	7.21992e-05	-1.00093
WBGene00018830	2.19524e-05	-1.00158
WBGene00011819	3.94734e-05	-1.00331
WBGene00006942	7.58204e-06	-1.00346
WBGene00009496	0.00496091	-1.00396
WBGene00044679	0.000928506	-1.00453
WBGene00022775	7.63924e-05	-1.00692
WBGene00002064	0.000218381	-1.00701
WBGene00007963	0.000513659	-1.00914
WBGene00008417	1.5833e-05	-1.00917
WBGene00000797	0.000900507	-1.00936
WBGene00015976	1.33992e-05	-1.00997
WBGene00019757	5.71886e-05	-1.01084
WBGene00011340	9.42362e-05	-1.01192
WBGene00019600	0.000100348	-1.01257
WBGene00013434	4.08774e-05	-1.01296
WBGene00000099	1.8967e-05	-1.01342
WBGene00195068	0.000619791	-1.01349
WBGene00004823	3.20546e-05	-1.01356
WBGene00010109	0.000344246	-1.01456
WBGene00013374	0.00127436	-1.01457
WBGene00009250	0.00492041	-1.01529
WBGene00015172	3.00506e-05	-1.01642
WBGene00013432	0.000269956	-1.01766
WBGene00017869	0.00627017	-1.01793
WBGene00001372	4.84855e-05	-1.01908
WBGene00019801	0.00010659	-1.01928
WBGene00015511	0.000419095	-1.02016
WBGene00016796	0.000436581	-1.02046
WBGene00018229	0.00593435	-1.02128
WBGene00020754	0.00593435	-1.02128
WBGene00021877	0.000182811	-1.02384
WBGene00016955	2.87949e-05	-1.02454
WBGene00015766	2.91244e-05	-1.0267
WBGene00015307	0.00450725	-1.02762
WBGene00000988	0.000211077	-1.03025
WBGene00020598	0.00264205	-1.03091
WBGene00017931	1.21315e-05	-1.03231
WBGene00020597	0.00526172	-1.0324
WBGene00007537	0.000640045	-1.0333
WBGene00022034	1.14688e-05	-1.03351
WBGene00012249	0.000143326	-1.0347
WBGene00008332	0.000269097	-1.03547
WBGene00011319	3.28546e-05	-1.03585
WBGene00002136	3.65938e-05	-1.03788
WBGene00011888	1.8559e-05	-1.03922
WBGene00011066	2.29169e-05	-1.03949
WBGene00000029	8.99478e-05	-1.03981
WBGene00011351	0.000791461	-1.04004
WBGene00009054	0.000146065	-1.04054
WBGene00015210	0.00216497	-1.04092
WBGene00016153	0.000442016	-1.04211
WBGene00008780	1.06423e-05	-1.04325
WBGene00013741	0.00209787	-1.04527
WBGene00021555	1.64389e-05	-1.04536
WBGene00006645	0.00326981	-1.04736
WBGene00001830	6.13066e-05	-1.0476
WBGene00010723	1.39734e-05	-1.05112
WBGene00005019	1.04825e-05	-1.05243
WBGene00004033	7.08699e-06	-1.05274
WBGene00003164	0.000162962	-1.05293
WBGene00015970	7.52507e-05	-1.05338
WBGene00001627	0.000306099	-1.05446
WBGene00000250	5.03463e-05	-1.05485
WBGene00009645	1.24619e-05	-1.05571
WBGene00019540	0.00236775	-1.05701
WBGene00010227	0.00015634	-1.05884
WBGene00012011	9.38767e-05	-1.06027
WBGene00017696	3.32776e-05	-1.06133
WBGene00015850	0.00282217	-1.0619
WBGene00009270	7.2622e-06	-1.06205
WBGene00044492	0.000315254	-1.06278
WBGene00008387	1.34679e-05	-1.06415
WBGene00020738	0.000127759	-1.06486
WBGene00015819	0.000387798	-1.06507
WBGene00014053	0.00156381	-1.06551
WBGene00018192	0.00241634	-1.067
WBGene00020642	0.0077318	-1.06962
WBGene00044235	0.00494364	-1.07008
WBGene00016421	3.03056e-05	-1.07051
WBGene00021649	7.23616e-05	-1.07076
WBGene00020686	0.00402875	-1.07147
WBGene00013747	0.000154103	-1.07148
WBGene00007087	2.30519e-05	-1.07193
WBGene00020103	3.5378e-05	-1.07205
WBGene00001829	2.51945e-05	-1.07456
WBGene00006660	0.000834545	-1.07545
WBGene00007303	0.000266711	-1.07546
WBGene00017358	4.7432e-05	-1.07569
WBGene00022830	5.17784e-06	-1.07713
WBGene00017452	0.00016263	-1.07823
WBGene00014085	5.15385e-05	-1.07977
WBGene00007966	0.000100251	-1.08032
WBGene00020516	6.8712e-06	-1.08074
WBGene00003499	2.60918e-05	-1.08372
WBGene00013141	0.00291858	-1.08399
WBGene00012435	1.14826e-05	-1.08469
WBGene00044337	8.97639e-05	-1.08473
WBGene00044357	8.97639e-05	-1.08473
WBGene00001514	8.55369e-06	-1.08657
WBGene00012487	1.86332e-05	-1.08668
WBGene00016799	6.38807e-06	-1.08691
WBGene00014062	0.000234307	-1.08808
WBGene00012546	0.00010495	-1.08816
WBGene00000974	0.000337726	-1.08821
WBGene00017073	0.00121377	-1.08839
WBGene00016398	1.87397e-05	-1.08914
WBGene00007503	8.1533e-05	-1.09071
WBGene00014124	4.37352e-06	-1.09078
WBGene00000653	0.000137781	-1.09079
WBGene00020375	3.85948e-05	-1.0915
WBGene00019152	7.1891e-05	-1.09212
WBGene00000034	0.000470504	-1.09238
WBGene00020202	0.00157901	-1.09252
WBGene00010367	2.28476e-05	-1.0959
WBGene00017801	0.00010978	-1.09728
WBGene00003372	4.10787e-06	-1.09826
WBGene00018806	3.36253e-05	-1.0985
WBGene00000644	0.000100348	-1.09897
WBGene00012942	0.000277328	-1.09898
WBGene00012715	1.209e-05	-1.09917
WBGene00003590	0.000112051	-1.101
WBGene00020588	3.70354e-05	-1.10263
WBGene00044290	0.000133207	-1.10339
WBGene00007624	1.00026e-05	-1.10342
WBGene00015306	9.65784e-05	-1.10541
WBGene00009413	0.000683511	-1.10751
WBGene00010247	0.00789782	-1.10925
WBGene00015505	0.000131253	-1.10998
WBGene00019030	1.82983e-05	-1.11236
WBGene00010378	0.00510984	-1.11293
WBGene00022532	0.000190753	-1.11391
WBGene00011027	0.00104516	-1.12022
WBGene00015842	5.48094e-05	-1.12232
WBGene00022177	0.000501344	-1.12573
WBGene00001571	1.56551e-05	-1.12729
WBGene00004976	1.81918e-05	-1.12877
WBGene00019997	0.000502144	-1.12932
WBGene00015287	0.000488775	-1.13092
WBGene00011583	0.00318204	-1.13312
WBGene00004141	0.00081886	-1.13516
WBGene00015327	0.000355948	-1.13582
WBGene00022228	0.000380231	-1.13585
WBGene00011184	0.00274681	-1.13604
WBGene00016564	6.65439e-05	-1.13706
WBGene00008812	0.00408386	-1.13725
WBGene00007446	6.70751e-05	-1.13768
WBGene00044204	6.69533e-05	-1.13959
WBGene00001044	8.79279e-05	-1.13982
WBGene00019812	0.00331893	-1.14303
WBGene00017450	0.000263337	-1.14586
WBGene00017269	1.21177e-05	-1.1479
WBGene00016942	8.13814e-06	-1.15067
WBGene00019082	0.00483828	-1.15147
WBGene00010323	0.00203049	-1.15184
WBGene00007611	0.000409932	-1.15271
WBGene00015357	0.000197747	-1.15292
WBGene00022110	5.4573e-05	-1.15302
WBGene00044756	0.00277891	-1.15398
WBGene00011061	1.10396e-05	-1.15401
WBGene00007978	1.56648e-05	-1.1541
WBGene00009355	2.62289e-05	-1.1543
WBGene00012104	1.33533e-05	-1.15523
WBGene00022753	0.000282355	-1.15642
WBGene00022854	1.0553e-05	-1.15755
WBGene00019556	0.00021114	-1.15925
WBGene00011258	0.000159306	-1.15927
WBGene00004985	8.08883e-05	-1.1598
WBGene00008346	3.91476e-05	-1.16003
WBGene00015682	0.00127678	-1.16043
WBGene00016576	0.000130455	-1.16057
WBGene00010637	0.000984141	-1.161
WBGene00022036	1.4033e-05	-1.16119
WBGene00002297	3.69699e-06	-1.16271
WBGene00012401	0.0021784	-1.16278
WBGene00008228	8.15207e-05	-1.16548
WBGene00003839	0.00325277	-1.16596
WBGene00015472	7.17744e-06	-1.16662
WBGene00007735	0.000488775	-1.16719
WBGene00044358	0.00355685	-1.16946
WBGene00017179	3.85948e-05	-1.17008
WBGene00012940	0.00465112	-1.17068
WBGene00000601	0.000160195	-1.17084
WBGene00018016	2.37712e-05	-1.17244
WBGene00014241	0.00152451	-1.1732
WBGene00020435	0.000131026	-1.17544
WBGene00015677	1.51271e-05	-1.17671
WBGene00007445	1.23975e-05	-1.17692
WBGene00020066	0.00693118	-1.17761
WBGene00021010	5.3395e-05	-1.17857
WBGene00006940	9.62585e-06	-1.17944
WBGene00010263	4.66425e-06	-1.18105
WBGene00011788	0.000844873	-1.18285
WBGene00016586	8.12236e-05	-1.18353
WBGene00016259	6.3632e-05	-1.18359
WBGene00006644	0.00117396	-1.18377
WBGene00015229	0.00109626	-1.18553
WBGene00015896	0.000674324	-1.18592
WBGene00000913	7.41628e-06	-1.18653
WBGene00002198	4.91584e-05	-1.18912
WBGene00010542	0.000162362	-1.19093
WBGene00012130	1.0334e-05	-1.1912
WBGene00020802	0.00093129	-1.19267
WBGene00009178	9.4585e-05	-1.19471
WBGene00020053	5.46332e-05	-1.19545
WBGene00011399	4.02336e-06	-1.19673
WBGene00017460	3.0794e-05	-1.19713
WBGene00018652	0.00133821	-1.19754
WBGene00008230	6.2507e-05	-1.19839
WBGene00008185	0.00484043	-1.19871
WBGene00006311	2.33363e-05	-1.20001
WBGene00001386	7.05989e-05	-1.20147
WBGene00012700	3.02948e-05	-1.20152
WBGene00007419	0.0075613	-1.2022
WBGene00022003	0.000145569	-1.20402
WBGene00000683	9.66956e-05	-1.20405
WBGene00020461	1.35857e-05	-1.2047
WBGene00010712	6.05512e-05	-1.20578
WBGene00015095	2.55542e-06	-1.20582
WBGene00000417	0.000112178	-1.20657
WBGene00008961	0.00076798	-1.20734
WBGene00206372	0.00286324	-1.20895
WBGene00010743	0.00322675	-1.20899
WBGene00018337	0.00556507	-1.21116
WBGene00016559	0.000226167	-1.21223
WBGene00008821	0.000848272	-1.21226
WBGene00017393	0.00151251	-1.21425
WBGene00018026	5.62766e-06	-1.21454
WBGene00009649	0.000412652	-1.21481
WBGene00185086	5.04471e-05	-1.21544
WBGene00014163	7.90115e-05	-1.21603
WBGene00194674	4.03022e-05	-1.21662
WBGene00012859	0.00100564	-1.21695
WBGene00009182	2.18777e-05	-1.21715
WBGene00021215	0.000276466	-1.2176
WBGene00006449	0.000243014	-1.2184
WBGene00017545	0.00198512	-1.22085
WBGene00013824	0.000656807	-1.22154
WBGene00009113	2.70484e-05	-1.22189
WBGene00009605	1.79375e-05	-1.22212
WBGene00019132	0.000281521	-1.22237
WBGene00013801	0.000140138	-1.22253
WBGene00014156	0.000383307	-1.22466
WBGene00009221	0.000158702	-1.22649
WBGene00195169	0.00356792	-1.22685
WBGene00013036	0.000350161	-1.22735
WBGene00013158	8.82761e-05	-1.22946
WBGene00022530	0.00125194	-1.22985
WBGene00010859	0.000100348	-1.23057
WBGene00018999	0.000219022	-1.2308
WBGene00011949	7.11868e-05	-1.23156
WBGene00220258	0.00734493	-1.23364
WBGene00018232	7.52127e-05	-1.23757
WBGene00235294	0.00301656	-1.23776
WBGene00021200	0.000162362	-1.23802
WBGene00016339	0.00050526	-1.23976
WBGene00002266	2.1892e-05	-1.24033
WBGene00013116	0.000252912	-1.24246
WBGene00022732	6.02138e-05	-1.24583
WBGene00011988	2.23645e-05	-1.24587
WBGene00004964	0.000640384	-1.24587
WBGene00015390	5.69487e-05	-1.24605
WBGene00001511	4.81587e-06	-1.24727
WBGene00014048	0.000437626	-1.24749
WBGene00004103	0.0065711	-1.24797
WBGene00021382	0.000825165	-1.24814
WBGene00019190	0.00130576	-1.24903
WBGene00018698	2.32378e-05	-1.25069
WBGene00013869	1.18338e-05	-1.25111
WBGene00018471	0.000191906	-1.25187
WBGene00009079	0.000187654	-1.25225
WBGene00006661	0.00119394	-1.25305
WBGene00019335	0.00025039	-1.25307
WBGene00010786	0.000659778	-1.25376
WBGene00012656	0.00241615	-1.25409
WBGene00019834	0.000257172	-1.25618
WBGene00022649	0.000298046	-1.25661
WBGene00021907	0.00676864	-1.25914
WBGene00000625	0.000230839	-1.2597
WBGene00044644	0.00286484	-1.25983
WBGene00002368	7.05028e-06	-1.26068
WBGene00022244	1.29816e-05	-1.26144
WBGene00044501	0.00249249	-1.26191
WBGene00077691	9.36496e-05	-1.26262
WBGene00015291	4.14033e-05	-1.26321
WBGene00010895	0.00144015	-1.26324
WBGene00044188	0.000657199	-1.26501
WBGene00020783	0.000240657	-1.26578
WBGene00010289	1.09159e-05	-1.26641
WBGene00010245	0.00125945	-1.26683
WBGene00018483	4.50846e-06	-1.26805
WBGene00013449	2.13074e-05	-1.2696
WBGene00016287	0.00740962	-1.27191
WBGene00011352	2.92424e-06	-1.27246
WBGene00010763	0.000866516	-1.273
WBGene00009609	0.00301792	-1.27362
WBGene00016765	4.04557e-05	-1.2746
WBGene00021271	0.00452337	-1.27473
[truncated: 1,986 more rows]
