# Supplementary material for: Pathogen infection and cholesterol deficiency activate the C. elegans p38 immune pathway through a TIR-1/SARM1 phase transition
Source: eLife. 2022 Jan 31;11:e74206. doi: 10.7554/eLife.74206 (PMC8923663; doi:10.7554/eLife.74206)
Supplement: Supplementary file 6. [file elife-74206-supp6.xlsx]

## Sheet: Sheet1
qRT-PCR Primers designed for this study
K08D8.4 qRT-PCR FWD	GGATACTAATGGACCAACTACATT
K08D8.4 qRT-PCR REV	TCCATCTTGTCTCCCAAGATAC
Genotyping primers used in this study
nhr-8(hd117) sequencing primer FWD	acaaactattgcgccctttc
nhr-8(hd117) sequencing primer REV	CACGGTCGGAGCAAACctaaa
nhr-8(hd117) sequencing primer Nested	ctcggcacgacaatctttgtt
tir-1(qd4) sequencing primer FWD	CATTGGGTAAATGAGGAAGAG
tir-1(qd4) sequencing primer REV	GCGAAGAGGTTCCCTATA A
tir-1::3xFLAG sequencing primer FWD	GCCAACGTGTAAGTTGTTGAAA
tir-1::3xFLAG sequencing primer REV	TTGAAAGACATTGGGAGTTTGA
tir-1 edit sequencing primer FWD	TCAGGAAATCGGTGCAATCCAAG
tir-1 edit sequencing primer REV	GTCGTTCTGTTCAACTCTCCAGT
crRNA sequences
tir-1 ΔSAM-5'_crRNA	GTTCGCCTCCGAAGCACTCACGG
tir-1 ΔSAM-3’_crRNA	ATTTGAAACCGCAAAACATCCGG
tir-1 G747P_crRNA	GATGTCGATAAGTTGTATGCTGG
tir-1 H833A_crRNA	TAAATGGGTTCACGACTATCAGG
tir-1 E788_crRNA	TTTAAATGATGATAACTGTGAGG
tir-1::3xFLAG_crRNA	AGAAGAGACTTAATTCCGATCGG
ssODN sequences
tir-1ΔSAM	CTCCAGACGAGGTCGCTGCCAAGTTCGCCTCCGAAGCACTCACGGTTATCGGCGAAGAGGACGTGGAAGTTGCAATGCTCTCCAAGCAAATTGA
tir-1 G747P	GGATACAGAGTGTTCATTGATGTCGATAAGTTGTATGCTCCAAAATTCGACAGCTCATTGCTCAAGAACA
tir-1 H833A	TACAAAGTATAATGGTGTTAAATGGGTTGATGACTATCAAGATGCATGTATGGCAAAAGTTGTACGTTTTATTACT
tir-1 E788A	CCAAACAGTTTGGATAGACTTTTAAATGATGATAACTGTGAAGATTGGGTGCACAAAGCTCTGAAATGTGCATTTGAACACCAGAAGAACATTATTC
tir-1::3xFLAG	AGCCTTCTGCATCCACAACTTCAGATCGGAATTCAGGAGACTATAAGGATCACGACGGCGATTACAAAGACCATGACATAGACTACAAAGATGATGATGACAAGTAAgtctcttctttaatcaatacatcaagtgccggttc
Primers used for tir-1::wrmScarlet dsDNA HDR PCR
tir-1::wrmScarlet FWD	GAGAAGGAAAATTCAGCCTTCTGCATCCACAACTTCAGATCGGAATTCAGGAATGGTCAGCAAGGGAGAGGC
tir-1::wrmScarlet REV	ccggcacttgatgtattgattaaagaagagacTTACTTGTAGAGCTCGTCCATTCCT
Primers used for mutation of recombinant tir
tir G747P FWD	GACAAACTGTATGCGCCCAAGTTTGACAGCAGC
tir G747P REV	GCTGCTGTCAAACTTGGGCGCATACAGTTTGTC
tir E788A FWD	GATTGGGTTCACAAAGCGCTGAAGTGCGCG
tir E788A REV	CGCGCACTTCAGCGCTTTGTGAACCCAATC
tir E788Q FWD	GATTGGGTTCACAAACAGCTGAAGTGCGCG
tir E788Q REV	CGCGCACTTCAGCTGTTTGTGAACCCAATC
tir H833A FWD	GTGTGAAGTGGGTTGCCGATTATCAGGACG
tir H833A REV	CGTCCTGATAATCGGCAACCCACTTCACAC
