# Supplementary material for: Pathogen infection and cholesterol deficiency activate the C. elegans p38 immune pathway through a TIR-1/SARM1 phase transition
Source: eLife. 2022 Jan 31;11:e74206. doi: 10.7554/eLife.74206 (PMC8923663; doi:10.7554/eLife.74206)
Supplement: Supplementary file 7. [file elife-74206-supp7.xlsx]

## Sheet: Sheet1
Wormbase ID	qval	log2(pmk-1(km25)/ wild-type uninfected )
WBGene00003058	0.00123843	-12.3606
WBGene00018971	0.000371332	-9.38276
WBGene00015933	0.000399427	-8.57854
WBGene00007872	0.000281377	-7.74301
WBGene00010125	0.00174773	-7.34011
WBGene00007875	0.00628257	-6.23957
WBGene00008584	0.000696449	-5.51483
WBGene00005832	0.00315735	-5.37582
WBGene00010659	0.000371332	-4.93838
WBGene00194658	0.00340208	-4.85658
WBGene00011979	0.00240691	-4.70202
WBGene00015932	0.00943886	-4.66173
WBGene00016773	0.026304	-4.53381
WBGene00009429	0.0115953	-4.38874
WBGene00010108	0.0179021	-4.31732
WBGene00003091	1.0779e-05	-4.27744
WBGene00000558	0.0020542	-4.0785
WBGene00019660	0.00189735	-4.07413
WBGene00044352	0.0203143	-4.01533
WBGene00009488	0.00144378	-3.99828
WBGene00015682	0.00391627	-3.99672
WBGene00001387	0.00381217	-3.87226
WBGene00010658	0.000281377	-3.86007
WBGene00009490	0.0122326	-3.73297
WBGene00007867	0.00166108	-3.7214
WBGene00015660	0.00381217	-3.6709
WBGene00021872	0.000200072	-3.65331
WBGene00050875	0.00655087	-3.65243
WBGene00010411	0.0494859	-3.58137
WBGene00008492	0.000200072	-3.48572
WBGene00013058	0.0248061	-3.42326
WBGene00007989	0.00999823	-3.41402
WBGene00015046	0.000399427	-3.38335
WBGene00010128	0.000399427	-3.35749
WBGene00007833	0.00293326	-3.35374
WBGene00017764	0.0223652	-3.34822
WBGene00019090	0.00199149	-3.28789
WBGene00010745	0.000199167	-3.28676
WBGene00010124	0.000244425	-3.25539
WBGene00014183	0.00790122	-3.25351
WBGene00008676	0.0065417	-3.24172
WBGene00014182	0.00963034	-3.21025
WBGene00014188	0.00963034	-3.21025
WBGene00003664	0.0224652	-3.12308
WBGene00005408	0.0414449	-2.96007
WBGene00017660	0.00744563	-2.95058
WBGene00003768	0.00381217	-2.899
WBGene00009914	0.046692	-2.89548
WBGene00010123	0.000519455	-2.88958
WBGene00018630	0.00192045	-2.88084
WBGene00003763	0.00240691	-2.82642
WBGene00018708	0.00315735	-2.8048
WBGene00012583	0.000310393	-2.79349
WBGene00007873	0.0337405	-2.77104
WBGene00014698	0.0290841	-2.69887
WBGene00011190	0.00192045	-2.68335
WBGene00019738	0.000399427	-2.63662
WBGene00009963	0.0489567	-2.61859
WBGene00014184	0.0204851	-2.6043
WBGene00018647	0.0153307	-2.56182
WBGene00017498	0.00628257	-2.49242
WBGene00011668	0.00981874	-2.46827
WBGene00021581	0.0117669	-2.43896
WBGene00019146	0.0101454	-2.4369
WBGene00014135	0.00249901	-2.34937
WBGene00017501	0.0212589	-2.34267
WBGene00008602	0.00200055	-2.33655
WBGene00021236	0.00401962	-2.20904
WBGene00008493	0.00752195	-2.20491
WBGene00044206	0.0179021	-2.20038
WBGene00017485	0.00851786	-2.17447
WBGene00012886	0.00428167	-2.13732
WBGene00014136	0.000799906	-2.11923
WBGene00019100	0.00166108	-2.10701
WBGene00013074	0.00147295	-2.0884
WBGene00018646	0.0122326	-2.01427
WBGene00003769	0.0185592	-2.00147
WBGene00017490	0.00433079	-1.99688
WBGene00017500	0.00433079	-1.99688
WBGene00007866	0.0369529	-1.97767
WBGene00016845	0.028718	-1.96461
WBGene00021178	0.0105835	-1.93569
WBGene00022725	0.0310215	-1.935
WBGene00007177	0.0095117	-1.93068
WBGene00009397	0.00228875	-1.89238
WBGene00008485	0.0106679	-1.8895
WBGene00008486	0.00484203	-1.83526
WBGene00001158	0.0152009	-1.82988
WBGene00018910	0.00123843	-1.82013
WBGene00021224	0.00123843	-1.82013
WBGene00017678	0.00254654	-1.79614
WBGene00010365	0.0495585	-1.78293
WBGene00012840	0.0036803	-1.73961
WBGene00009964	0.015495	-1.72544
WBGene00017488	0.0394879	-1.72485
WBGene00010931	0.00628257	-1.72365
WBGene00021518	0.000301805	-1.71522
WBGene00019744	0.0101454	-1.70451
WBGene00044073	0.0223652	-1.6934
WBGene00013636	0.0137121	-1.66917
WBGene00014107	0.0229181	-1.65913
WBGene00017484	0.00744563	-1.65512
WBGene00008988	0.0239556	-1.63406
WBGene00001076	0.0277879	-1.60003
WBGene00045096	0.0472353	-1.577
WBGene00021397	0.00670367	-1.56833
WBGene00022590	0.00498796	-1.56428
WBGene00018731	0.00134083	-1.55657
WBGene00015362	0.00714946	-1.54988
WBGene00016052	0.0247231	-1.52018
WBGene00022002	0.00980291	-1.516
WBGene00003957	0.000371302	-1.51444
WBGene00015514	0.000399427	-1.50786
WBGene00000446	0.0494859	-1.47959
WBGene00003605	0.00283106	-1.47222
WBGene00018729	0.0036002	-1.46452
WBGene00008577	0.0234736	-1.45543
WBGene00002110	0.00252566	-1.44036
WBGene00012535	0.0223652	-1.43647
WBGene00016659	0.00182656	-1.43474
WBGene00022645	0.00134083	-1.4265
WBGene00012728	0.0142373	-1.42616
WBGene00017041	0.031116	-1.4185
WBGene00007460	0.0330542	-1.41705
WBGene00008494	0.0424655	-1.41221
WBGene00007153	0.00166108	-1.40782
WBGene00001912	0.0239556	-1.40465
WBGene00003090	0.000418487	-1.40197
WBGene00019404	0.00758294	-1.39903
WBGene00022330	0.0248061	-1.37949
WBGene00014138	0.0122326	-1.37108
WBGene00009396	0.00166108	-1.35826
WBGene00000878	0.00240691	-1.33795
WBGene00000673	0.0208712	-1.31948
WBGene00077692	0.0172311	-1.31376
WBGene00008843	0.0218161	-1.30531
WBGene00001885	0.0463189	-1.29694
WBGene00009394	0.00660485	-1.28693
WBGene00020156	0.0053672	-1.28609
WBGene00015823	0.00144378	-1.27722
WBGene00017291	0.0117669	-1.27443
WBGene00018070	0.0198366	-1.2659
WBGene00044502	0.0219784	-1.26234
WBGene00015759	0.0212663	-1.25577
WBGene00015565	0.00240691	-1.25378
WBGene00000219	0.00428167	-1.25372
WBGene00001736	0.0117669	-1.25176
WBGene00000373	0.00900928	-1.24644
WBGene00000746	0.0351767	-1.23132
WBGene00006038	0.00182656	-1.22707
WBGene00019215	0.0351657	-1.22093
WBGene00009750	0.0288238	-1.20755
WBGene00009431	0.00628257	-1.20659
WBGene00021959	0.00094247	-1.19794
WBGene00022644	0.00049972	-1.19592
WBGene00002269	0.00660485	-1.19196
WBGene00017591	0.00434103	-1.1777
WBGene00009393	0.00340208	-1.17249
WBGene00001933	0.0417244	-1.16754
WBGene00021350	0.00226615	-1.16666
WBGene00014170	0.0180918	-1.16467
WBGene00008495	0.00340208	-1.1624
WBGene00002273	0.00381217	-1.15996
WBGene00018645	0.014558	-1.15397
WBGene00012781	0.00331472	-1.14495
WBGene00010722	0.00999823	-1.14334
WBGene00019759	0.0117669	-1.14061
WBGene00044901	0.027403	-1.1398
WBGene00000778	0.0401673	-1.13785
WBGene00007601	0.00509074	-1.13318
WBGene00012673	0.0400837	-1.13314
WBGene00009377	0.00381217	-1.12598
WBGene00010050	0.003721	-1.12447
WBGene00019327	0.00192045	-1.11975
WBGene00009457	0.0205877	-1.11762
WBGene00003640	0.0107537	-1.11434
WBGene00003959	0.00340208	-1.11279
WBGene00001936	0.0194106	-1.10821
WBGene00009308	0.00147295	-1.10254
WBGene00007807	0.00166108	-1.08974
WBGene00017703	0.0128629	-1.08779
WBGene00004451	0.00166108	-1.0861
WBGene00206502	0.042817	-1.07899
WBGene00000779	0.00340208	-1.07604
WBGene00022754	0.00222994	-1.07088
WBGene00018099	0.0204851	-1.06248
WBGene00021927	0.00805632	-1.05881
WBGene00006529	0.00874979	-1.05277
WBGene00009533	0.0117669	-1.05267
WBGene00010633	0.0137758	-1.05111
WBGene00010556	0.00656536	-1.04496
WBGene00004445	0.00639505	-1.04421
WBGene00012643	0.00278342	-1.04401
WBGene00003080	0.00388319	-1.03715
WBGene00010769	0.0190292	-1.0298
WBGene00023450	0.0132227	-1.02857
WBGene00012158	0.00553513	-1.02757
WBGene00000218	0.00660485	-1.02467
WBGene00009729	0.00999823	-1.02407
WBGene00016435	0.00381217	-1.02289
WBGene00004952	0.0119093	-1.02188
WBGene00021486	0.00166108	-1.01542
WBGene00018218	0.0141161	-1.01442
WBGene00004418	0.00428167	-1.01376
WBGene00003530	0.00200055	-1.01335
WBGene00013000	0.0179021	-1.01211
WBGene00004478	0.00260571	-1.01005
WBGene00019194	0.032616	-1.01001
WBGene00000783	0.0141896	-1.00808
WBGene00019565	0.0412642	-1.00557
WBGene00002059	0.00340208	-1.00547
WBGene00044746	0.00825006	-1.00542
