# Supplementary figures and images for: Pathogen infection and cholesterol deficiency activate the C. elegans p38 immune pathway through a TIR-1/SARM1 phase transition
Source: eLife journal article supplement (doi:10.7554/elife.74206), 2022-01-31

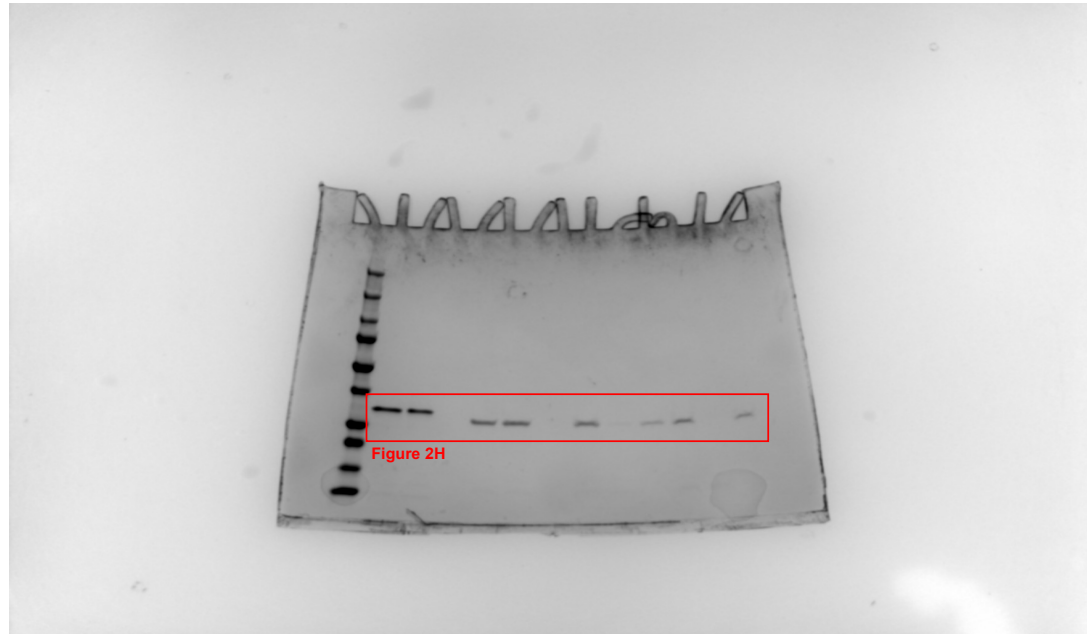

**Figure 2H.** Precentrifugation control, supernatant, and pelleted fractions of 5  $\mu$ M ceTIR in 0, 10, 17.5, or 25% PEG 3350.

Supplement: data2 [file elife-74206-data2-v2.zip]
